# Supplementary material
Source: Royal Society of Chemistry journal article supplement (doi:10.1039/d6tc01255h)
Supplement: d6tc01255h1.pdf [file d6tc01255h1.pdf]

Supplementary Information

# Heptagon-Fusion Strategy as a Molecular Design Strategy for Distorted Acenes

Masato Hisada<sup>1</sup>, Daiki Shimizu,<sup>1\*</sup> and Kenji Matsuda<sup>1,2\*</sup>

<sup>1</sup>Department of Synthetic Chemistry and Biological Chemistry, Graduate School of Engineering, Kyoto University, Nishikyo-ku, Kyoto 615-8510, Japan.

<sup>2</sup>Fukui Institute for Fundamental Chemistry, Kyoto University, Sakyo-ku, Kyoto 606-8103, Japan.

dshimizu@sbchem.kyoto-u.ac.jp (D.S.)

kmatsuda@sbchem.kyoto-u.ac.jp (K.M.)

## Contents

1. Experimental Details
2. X-Ray Diffraction Analysis
3. Kinetics of the Isomerization Pathway between saddle-**Ant7** and twisted- **Ant7**
4. Absorption and Fluorescence Measurement
5. Chiral HPLC and Circular Dichroism (CD) Analysis
6. Theoretical Calculations
7. Supporting References
8. Molecular Geometries, Excitations, and Thermodynamic Parameters by Theoretical Calculations

## 1. Experimental Details

All reagents and solvents were obtained from commercial suppliers and used without further purification, unless noted. All reactions were monitored by thin-layer chromatography carried out on 0.2 mm Merck silica gel plates (60F-254). Column chromatography was performed on silica gel (Kanto Chemical Co., Inc., 63–210 mesh) or a Biotage Isolera One instrument with a Rening flash silica gel cartridge. Compounds **Naph7** and saddle-**Ant7** and twisted-**Ant7** were purified by preparative gel permeation chromatography (GPC) (Japan Analytical Industry Co., Ltd., JAIGEL-2HR-40, eluent: chloroform). <sup>1</sup>H and <sup>13</sup>C NMR spectra were recorded on a JEOL ECS400, ECZ500, or ECZ600 spectrometer. Tetramethylsilane ( $\delta=0$  ppm for <sup>1</sup>H and <sup>13</sup>C in CDCl<sub>3</sub>) and residual solvents (5.32 ppm for <sup>1</sup>H and 53.8 ppm for <sup>13</sup>C in CD<sub>2</sub>Cl<sub>2</sub> and 5.97 ppm for <sup>1</sup>H and 73.39 ppm for <sup>13</sup>C in (CD<sub>2</sub>Cl)<sub>2</sub>) were used as internal references for NMR spectra. (CD<sub>2</sub>Cl)<sub>2</sub> and CD<sub>2</sub>Cl<sub>2</sub> for NMR spectroscopy were purified by passing through a short aluminum oxide pad before use. The quantitative <sup>13</sup>C NMR spectra for **4** were recorded with inverse gated decoupling at 10 s relaxation delay. Mass spectra were recorded on a Thermo Fisher Scientific EXACTIVE plus mass analyzer. Compounds **5**, **6** were synthesized in our previous report.<sup>S1</sup>

2',3'-dibromo-2,2''-dichloro-1,1':4,1''-terphenyl (**4**).

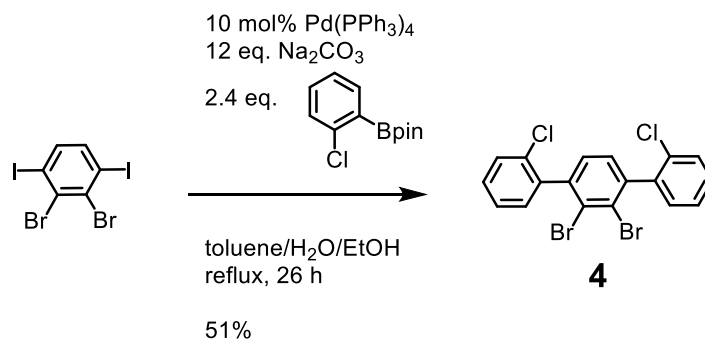

To a three-neck 1 L round-bottom flask containing 2,3-Dibromo-1,4-diiodobenzene (5.0 g, 10 mmol), (2-chlorophenyl)boronic acid (3.9 g, 25 mmol, 2.4 eq.), Pd(PPh<sub>3</sub>)<sub>4</sub> (1.2 g, 1.0 mmol, 10 mol%), and Na<sub>2</sub>CO<sub>3</sub> (13 g, 120 mmol, 12 equiv.), toluene (150 mL), water (60 mL) and EtOH (30 mL) were added under an atmosphere of N<sub>2</sub>. The mixture was heated to reflux and stirred for 26 h. Then, the reaction mixture was diluted with CH<sub>2</sub>Cl<sub>2</sub> and washed with water and brine. The organic phase was collected and dried over anhydrous Na<sub>2</sub>SO<sub>4</sub>. The residue, after concentration under reduced pressure, was purified by silica gel column chromatography (*n*-hexane), which afforded **4** as a colorless solid (2.4 g, 5.3 mmol, 51%). <sup>1</sup>H NMR (600 MHz, (CD<sub>2</sub>Cl)<sub>2</sub>), δ/ppm, as a mixture of two diastereomers): δ 7.51–7.48 (m, 2H), 7.39–7.26 (m, 8H); <sup>13</sup>C NMR (151 MHz, (CD<sub>2</sub>Cl)<sub>2</sub>), δ/ppm, a isomer): δ 141.9, 140.2, 132.8, 130.8, 129.4<sub>6</sub>, 129.3<sub>6</sub>, 129.2, 126.7<sub>8</sub>, 126.7; <sup>13</sup>C NMR (151 MHz, (CD<sub>2</sub>Cl)<sub>2</sub>), δ/ppm, other isomer): δ 141.9, 140.3, 132.9, 130.7, 129.4<sub>8</sub>, 129.4<sub>0</sub>, 129.1, 126.8<sub>0</sub>, 126.6; HR-APCI-orbitrapMS (*m/z*): [M]<sup>+</sup> calcd for C<sub>18</sub>H<sub>10</sub>Br<sub>2</sub>Cl<sub>2</sub><sup>+</sup>, 453.8521; found, 453.8518.

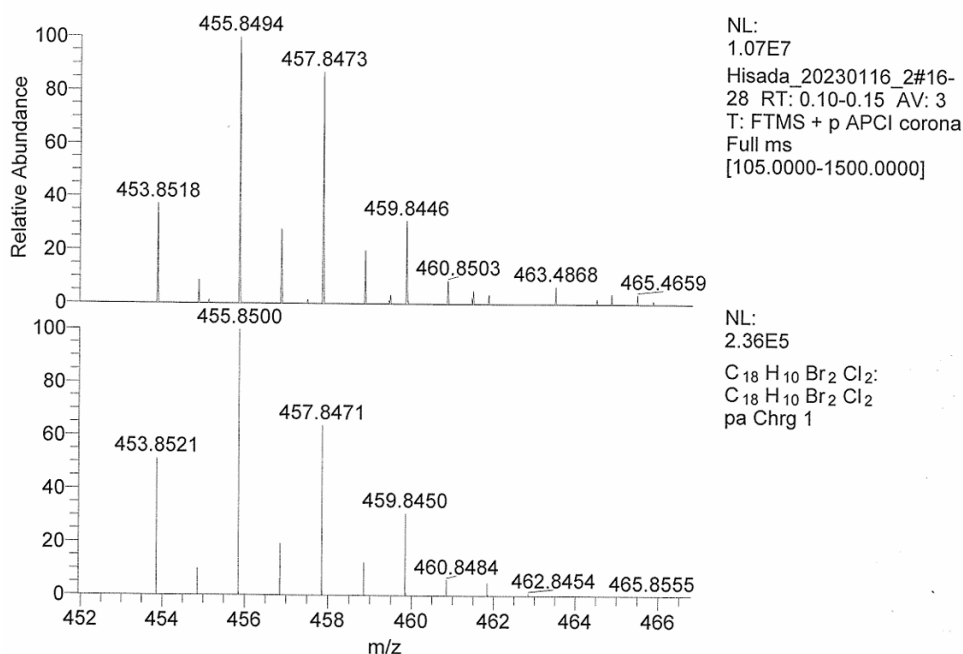

Figure S1. Observed and simulated high-resolution mass spectra of **4** (APCI-orbitrap, positive mode).

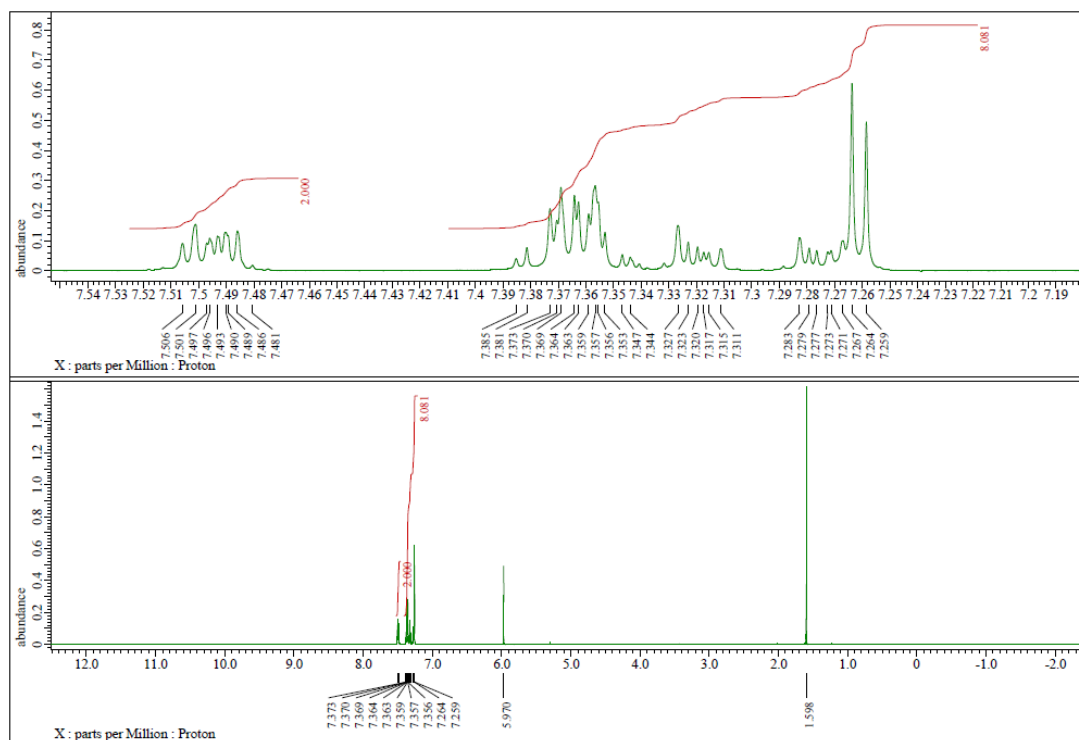

Figure S2.  $^1\text{H}$  NMR spectrum of 4 as a mixture of two diastereomers at room temperature ( $(\text{CD}_2\text{Cl}_2)_2$ , 600 MHz).

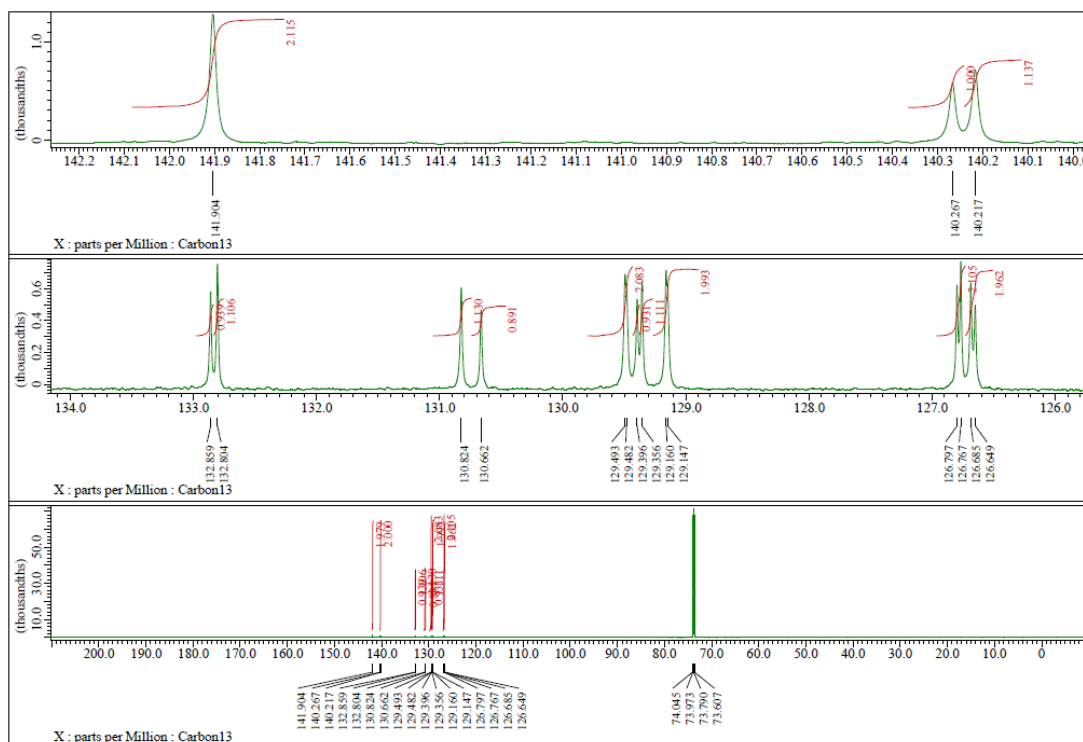

Figure S3. Quantitative  $^{13}\text{C}$  NMR spectrum of 4 as a mixture of two diastereomers at room temperature ( $(\text{CD}_2\text{Cl}_2)_2$ , 151 MHz).

1,4,5,8-tetrakis(2-chlorophenyl)-1,4-dihydro-1,4-epoxynaphthalene (**7**).

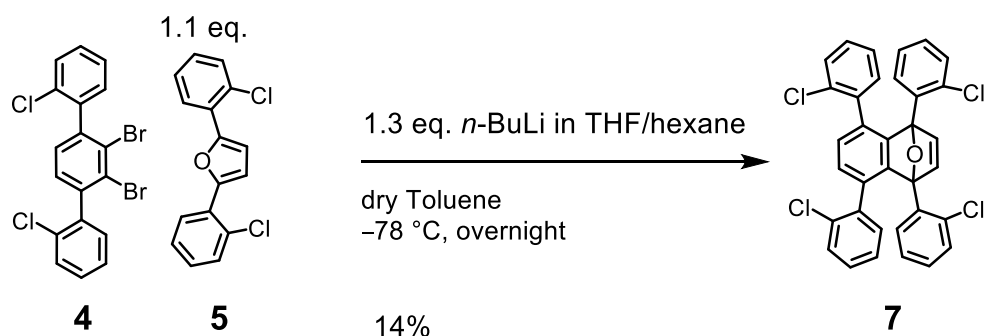

To a three-neck 200 mL round-bottom flask containing **4** (440 mg, 1.0 mmol) and **5** (310 mg, 1.1 mmol, 1.1 eq.), dry toluene (24 mL) were added under an atmosphere of N<sub>2</sub>. The mixture was cooled to -78 °C. To the mixture, *n*-butyllithium (1.6 M in THF, 0.78 mL, 1.2 mmol, 1.3 eq.) diluted in dry hexane (10 mL) was added dropwise over 1.5 h. The reaction mixture was warmed up to room temperature and stirred overnight. The reaction mixture was poured onto methanol and then diluted with EtOAc and washed with water and brine. The organic phase was collected, dried over anhydrous Na<sub>2</sub>SO<sub>4</sub> and concentrated under reduced pressure. The residue was purified by silica gel column chromatography (*n*-hexane/CH<sub>2</sub>Cl<sub>2</sub> = 9/1), which afforded **6** as a colorless solid (80 mg, 0.14 mmol, 14 %).

<sup>1</sup>H NMR (500 MHz, CDCl<sub>3</sub>, δ/ppm): δ 8.02 (s, 1H), 7.72 (s, 1H), 7.30–6.88 (m, 8H); <sup>13</sup>C NMR (126 MHz, CDCl<sub>3</sub>, δ/ppm): δ 148.8, 143.4, 137.4, 134.5, 133.1, 132.8, 132.3, 131.0, 130.4, 130.1, 129.1, 128.3, 128.1, 127.1, 125.8, 125.6, 93.0; HR-ESI-orbitrapMS (*m/z*): [M + H]<sup>+</sup> calcd for C<sub>34</sub>H<sub>20</sub>OCl<sub>4</sub>Na<sup>+</sup>, 607.0160; found, 607.0159.

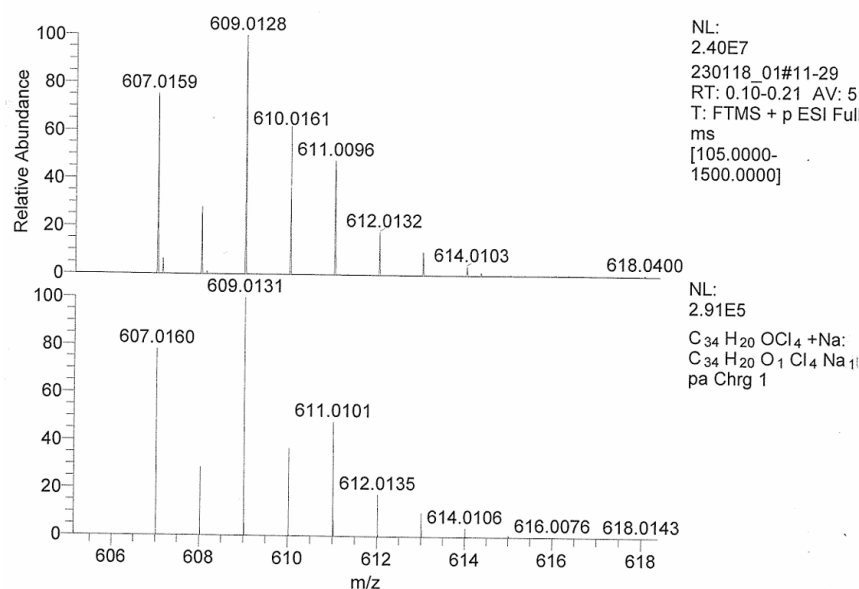

Figure S4. Observed and simulated high-resolution mass spectra of **7** (ESI-orbitrap, positive mode).

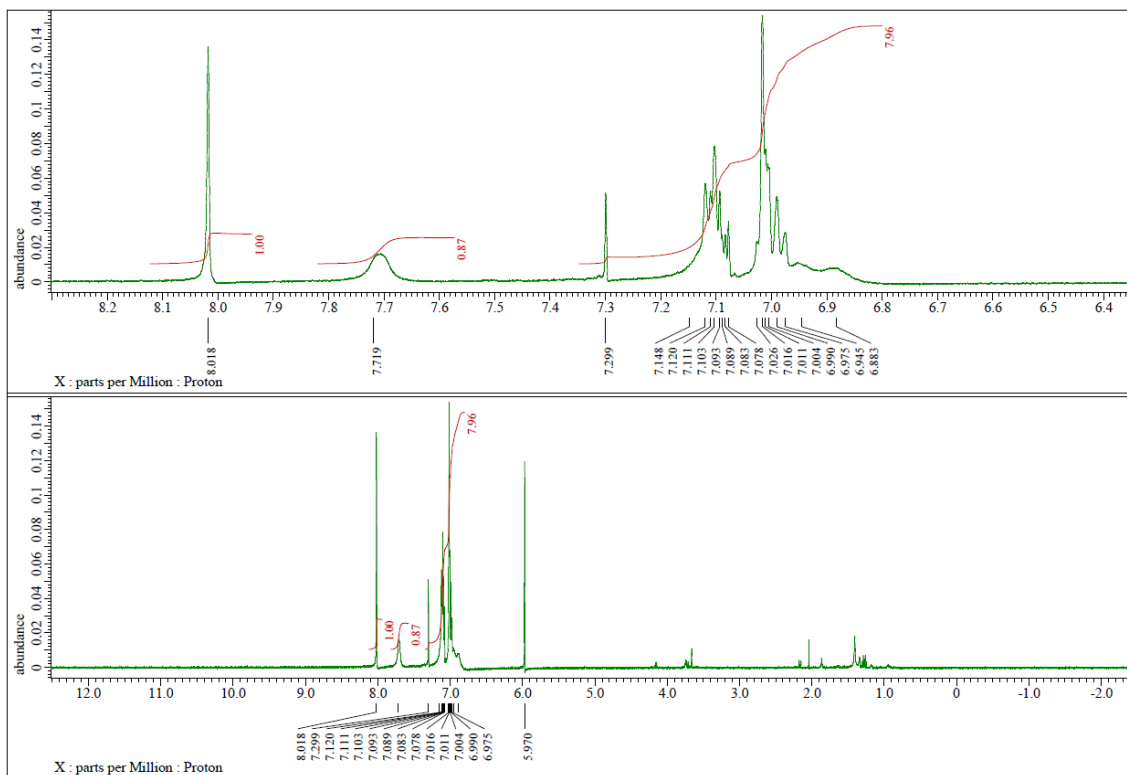

Figure S5.  $^1\text{H}$  NMR spectrum of 7 at 120°C ( $(\text{CDCl}_2)_2$ , 500 MHz).

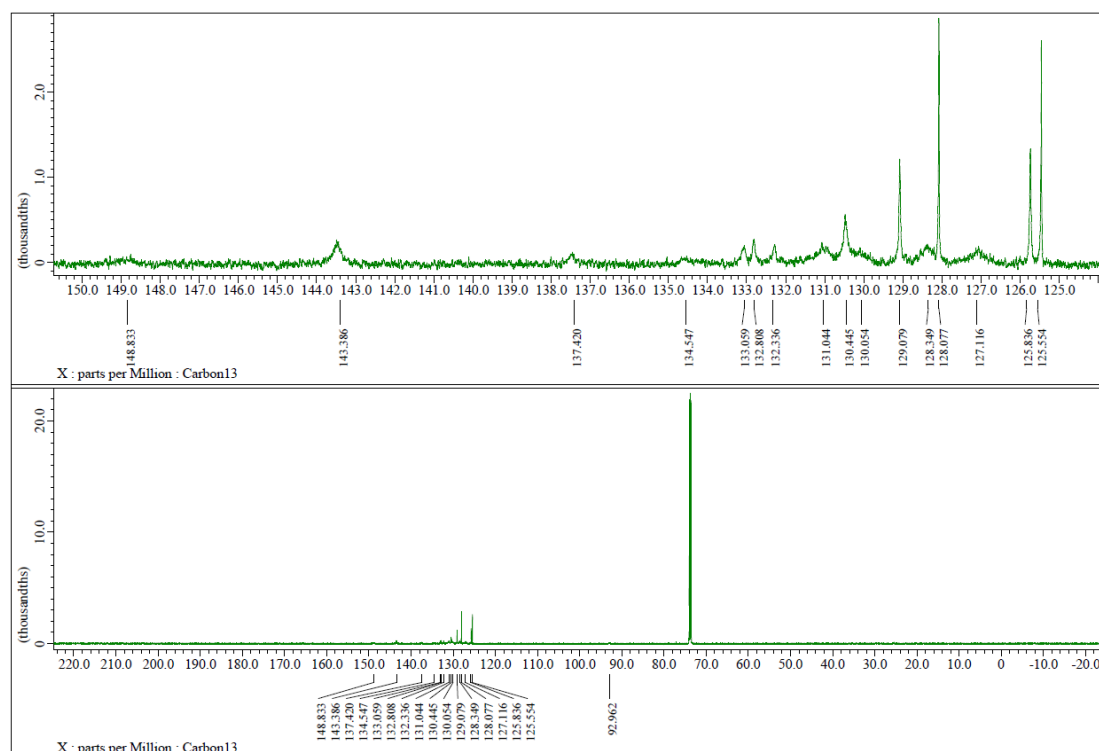

Figure S6.  $^{13}\text{C}$  NMR spectrum of 7 at 120°C ( $(\text{CDCl}_2)_2$ , 126 MHz).

1,4,9,10-tetrakis(2-chlorophenyl)-9,10-dihydro-9,10-epoxyanthracene (**8**).

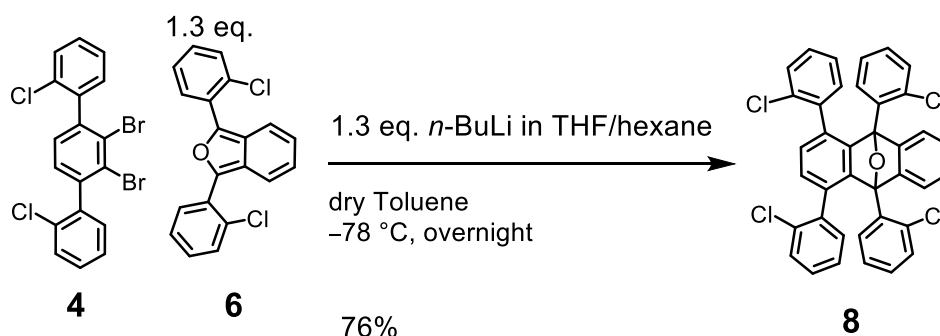

To a three-neck 200 mL round-bottom flask containing **4** (900 mg, 2.0 mmol) and **6** (930 mg, 2.7 mmol, 1.4 eq.), dry toluene (48 mL) were added under an atmosphere of N<sub>2</sub>. The mixture was cooled to -78 °C. To the mixture, *n*-butyllithium (1.6 M in THF, 1.6 mL, 2.6 mmol, 1.3 eq.) diluted in dry hexane (21 mL) was added dropwise over 1.5 h. The reaction mixture was warmed up to room temperature and stirred overnight. The reaction mixture was poured onto methanol and then diluted with EtOAc and washed with water and brine. The organic phase was collected, dried over anhydrous Na<sub>2</sub>SO<sub>4</sub> and concentrated under reduced pressure. The residue was purified by silica gel column chromatography (*n*-hexane/CH<sub>2</sub>Cl<sub>2</sub> = 9/1 → 1/1), which afforded **8** as a colorless solid (950 mg, 1.5 mmol, 76 %).

<sup>1</sup>H NMR (600 MHz, CDCl<sub>3</sub>, δ/ppm): δ 8.16–8.15 (m, 2H), 7.90 (br, 2H), 7.29–7.26 (m, 4H), 7.21–7.02 (m, 12H), 6.96–6.93 (m, 2H); <sup>13</sup>C NMR (151 MHz, CDCl<sub>3</sub>, δ/ppm): δ 150.5, 147.8, 137.1, 136.0, 133.0, 132.4, 132.2, 131.4, 131.2, 130.2, 129.3, 129.1, 128.1, 127.7, 125.2, 125.1, 125.0, 124.0, 91.0; HR-ESI-orbitrapMS (*m/z*): [M + H]<sup>+</sup> calcd for C<sub>38</sub>H<sub>22</sub>OCl<sub>4</sub>Na<sup>+</sup>, 657.0317; found, 657.0304.

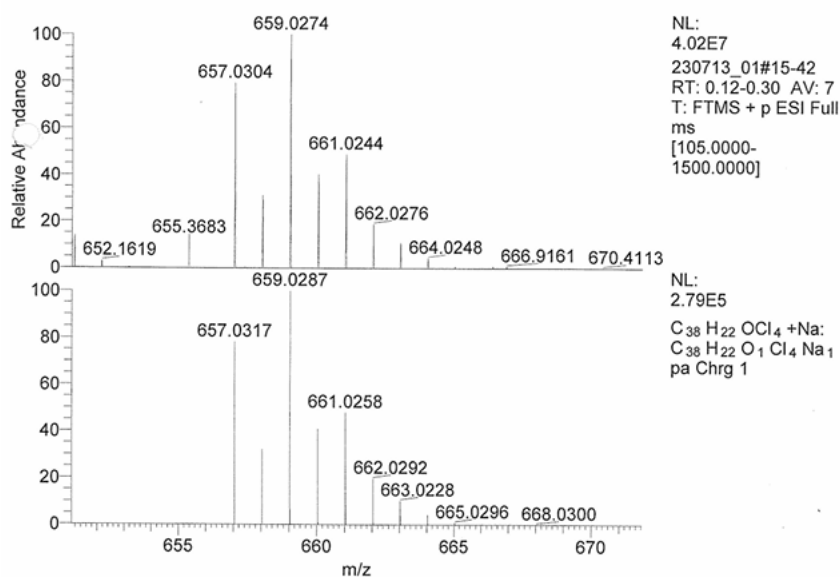

Figure S7. Observed and simulated high-resolution mass spectra of **8** (ESI-orbitrap, positive mode).

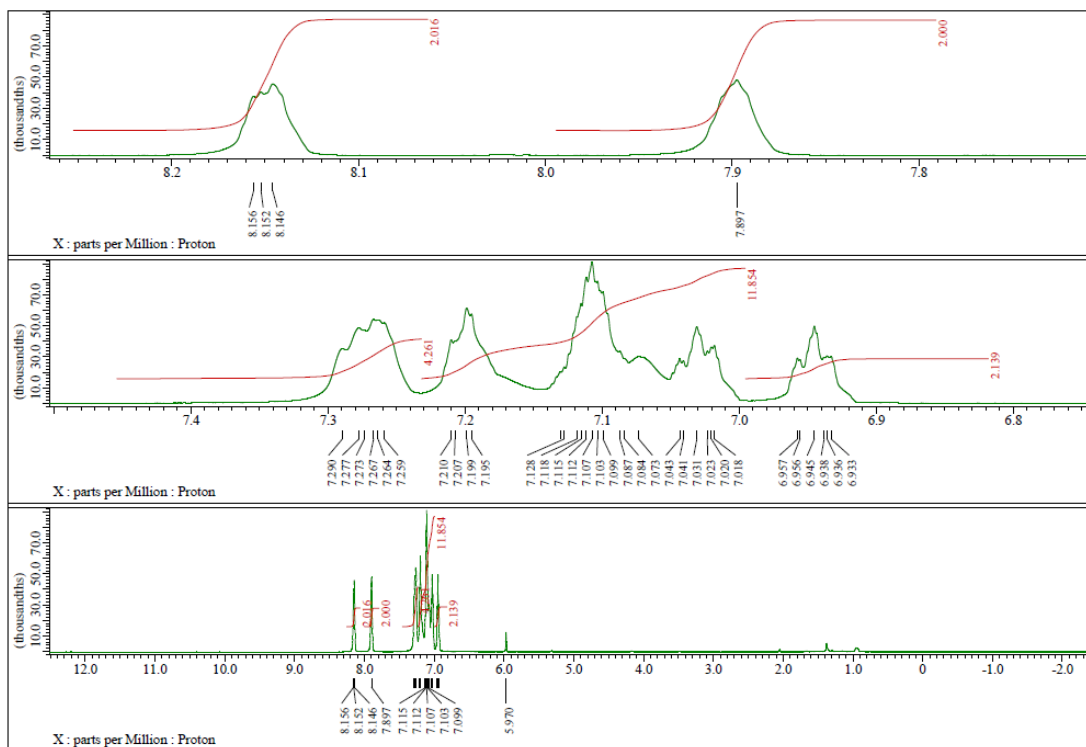

**Figure S8.**  $^1\text{H}$  NMR spectrum of **8** at room temperature ( $(\text{CD}_2\text{Cl}_2)$ , 600 MHz).

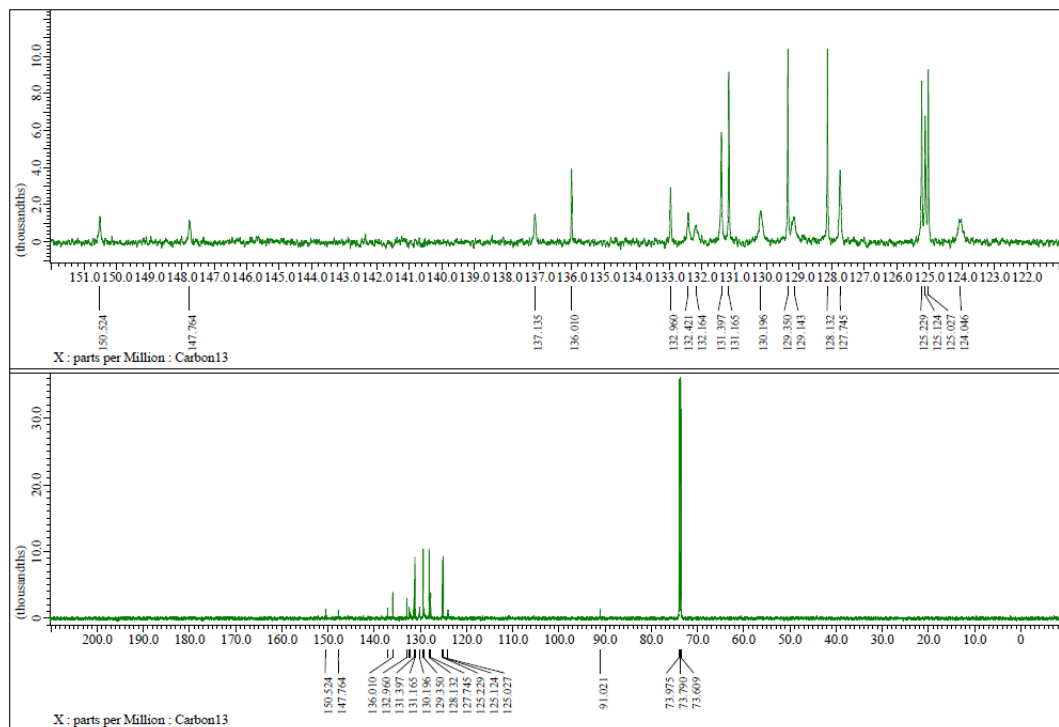

**Figure S9.**  $^{13}\text{C}$  NMR spectrum of **8** at room temperature ( $(\text{CD}_2\text{Cl}_2)$ , 151 MHz).

dibenzo[4,5:6,7]cyclohepta[1,2,3-de]dibenzo[4,5:6,7]cyclohepta[1,2,3-ij]naphthalene (**Naph7**).

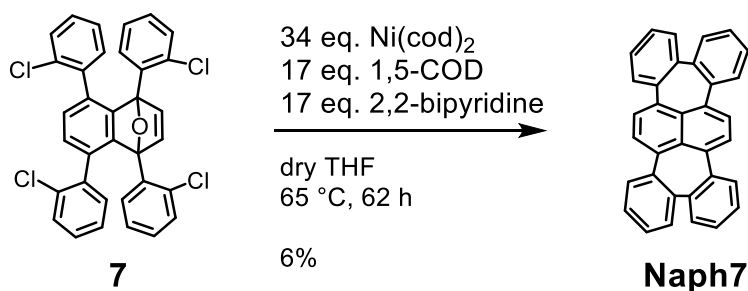

To a three-neck 300 mL round-bottom flask containing **7** (60 mg, 0.10 mmol), Ni(cod)<sub>2</sub> (480 g, 1.8 mmol, 17 eq.) and 2,2-bipyridyl (272 g, 1.7 mmol, 17 eq.), 1,5-COD (0.21 ml, 1.7 mmol, 17 eq.) and dry THF (120 mL) were added under an atmosphere of N<sub>2</sub>. The mixture was heated at 65 °C and stirred for 22 h. Subsequently, additional Ni(cod)<sub>2</sub> (480 g, 1.8 mmol, 17 eq.) was added, and the mixture was stirred for further 40 h at 65 °C. The reaction mixture was diluted with EtOAc and washed with water and brine. The organic phase was dried over anhydrous Na<sub>2</sub>SO<sub>4</sub> and concentrated under reduced pressure. The residue was purified by silica gel column chromatography (*n*-hexane/CH<sub>2</sub>Cl<sub>2</sub> = 9/1) and GPC, which afforded **Naph7** as a white solid (10 mg, 0.023 mmol, 6%).

<sup>1</sup>H NMR (600 MHz, CD<sub>2</sub>Cl<sub>2</sub>, δ/ppm): δ 7.66 (s, 4H), 7.63 (dd, J = 7.8, 1.4 Hz, 4H), 7.43 (td, J = 7.6, 1.4 Hz, 4H), 7.37 (td, J = 7.6, 1.4 Hz, 4H), 7.08 (dd, J = 7.8, 1.3 Hz, 4H); <sup>13</sup>C NMR (151 MHz, CD<sub>2</sub>Cl<sub>2</sub>, δ/ppm): δ 140.8, 139.2, 138.8, 136.5, 133.0, 130.6, 128.8, 128.2, 126.3, 125.0; HR-APCI-orbitrapMS (*m/z*): [M + H]<sup>+</sup> calcd for C<sub>34</sub>H<sub>21</sub><sup>+</sup>, 429.1638; found, 429.1641.

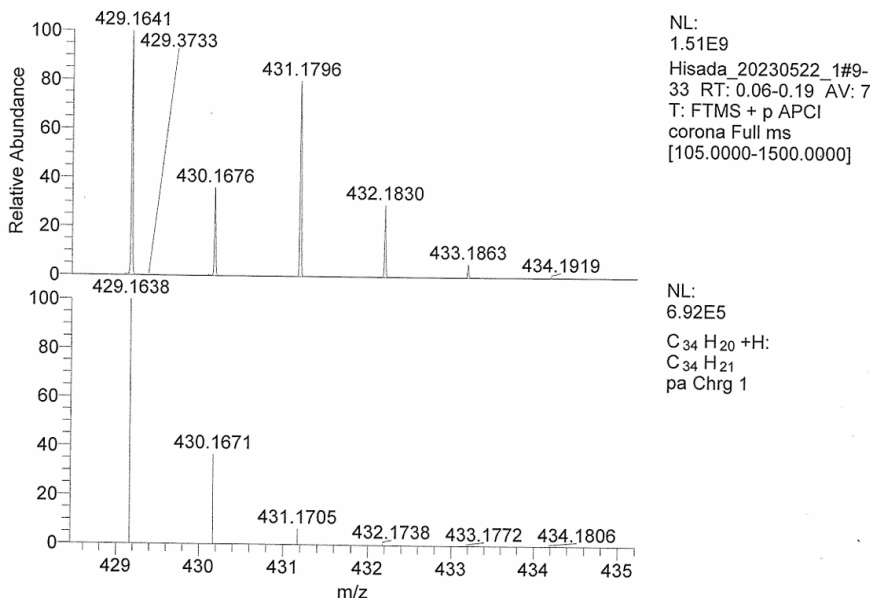

**Figure S10.** Observed and simulated high-resolution mass spectra of **Naph7** (APCI-orbitrap, positive mode).

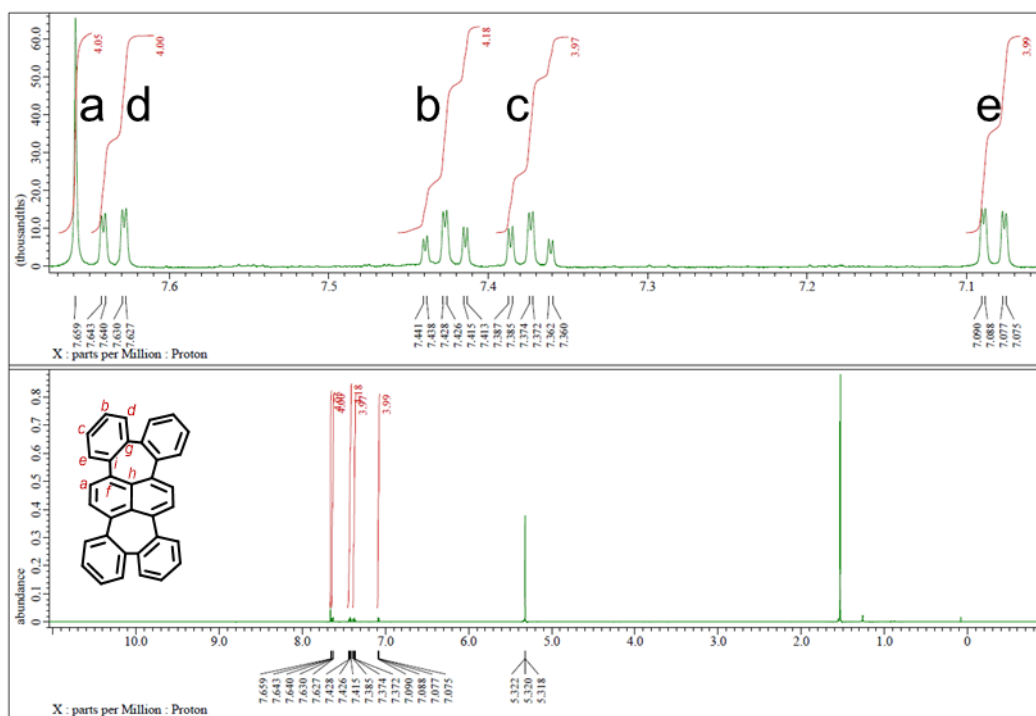

Figure S11.  $^1\text{H}$  NMR spectrum of Naph7 at room temperature ( $\text{CD}_2\text{Cl}_2$ , 600 MHz).

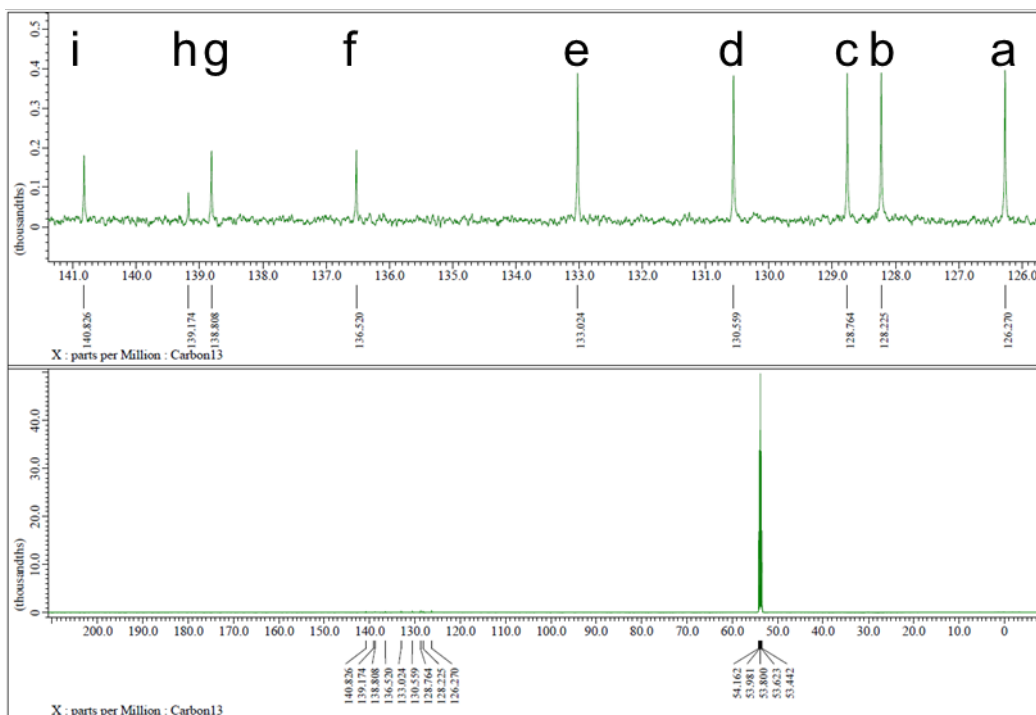

Figure S12.  $^{13}\text{C}$  NMR spectrum of Naph7 at room temperature ( $\text{CD}_2\text{Cl}_2$ , 151 MHz).

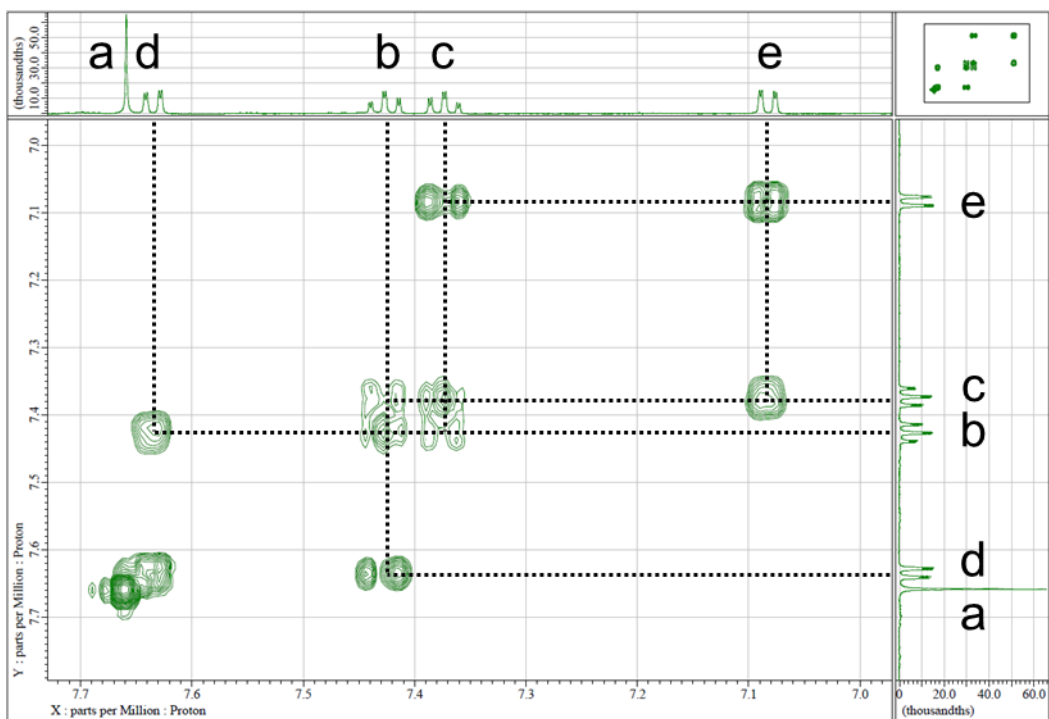

Figure S13.  $^1\text{H}$ - $^1\text{H}$  COSY spectrum of Naph7 at room temperature ( $\text{CD}_2\text{Cl}_2$ , 600 MHz).

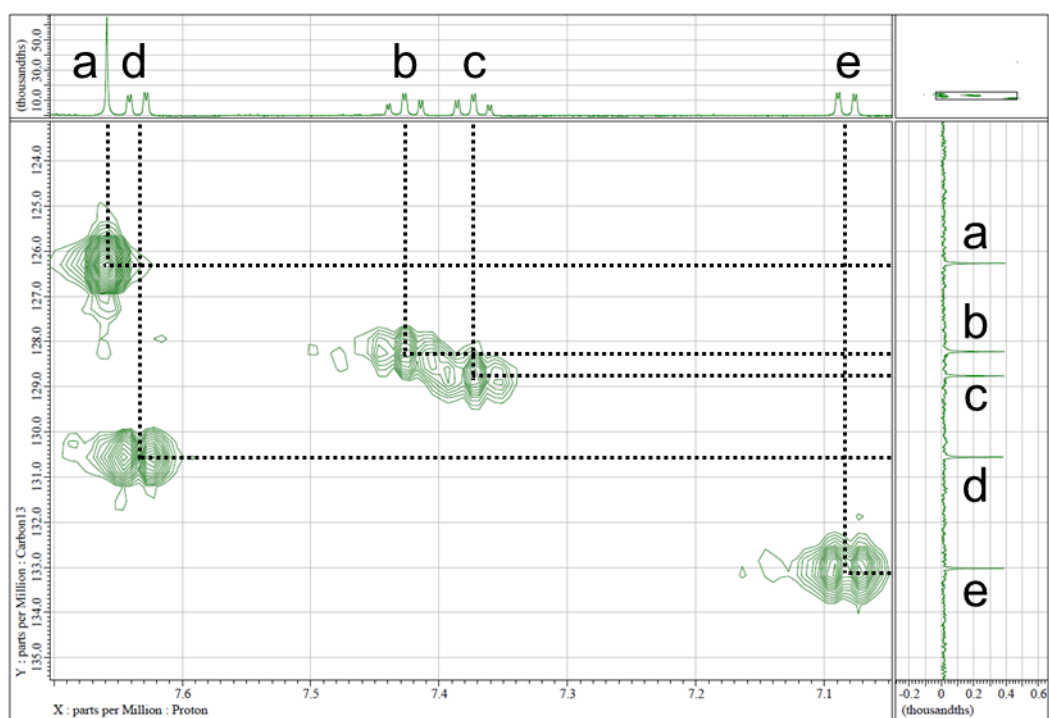

Figure S14.  $^{13}\text{C}/^1\text{H}$  HMQC spectrum of Naph7 at room temperature ( $\text{CD}_2\text{Cl}_2$ , 600 MHz).

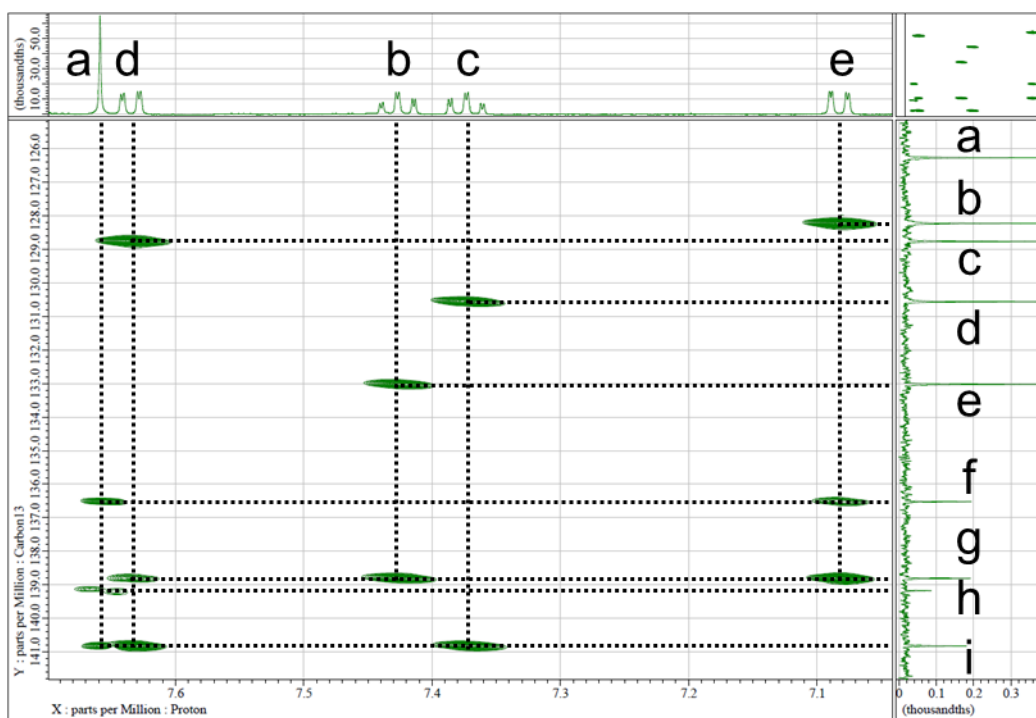

Figure S15.  $^{13}\text{C}/^1\text{H}$  HMBC spectrum of Naph7 at room temperature ( $\text{CD}_2\text{Cl}_2$ , 600 MHz).

dibenzo[4,5:6,7]cyclohepta[1,2,3-de]dibenzo[4,5:6,7]cyclohepta[1,2,3-ij]naphthalene (**Ant7**).

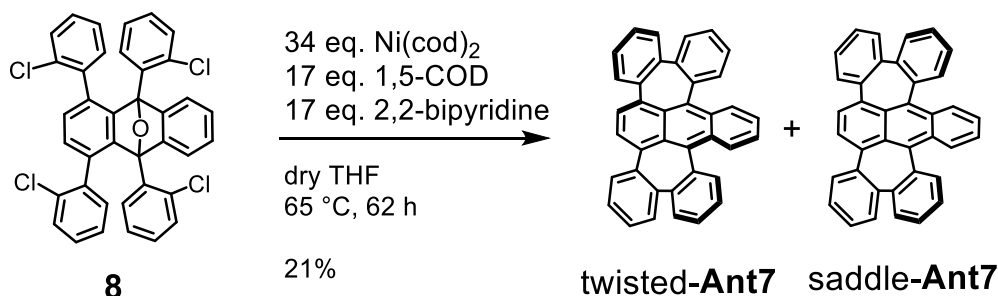

To a three-neck 500 mL round-bottom flask containing **8** (380 mg, 0.59 mmol), Ni(cod)<sub>2</sub> (2.8 g, 10 mmol, 17 eq.) and 2,2-bipyridyl (1.6 g, 10 mmol, 17 eq.), 1,5-COD (1.3 ml, 10 mmol, 17 eq.) and dry THF (180 mL) were added under an atmosphere of N<sub>2</sub>. The mixture was heated at 65 °C and stirred for 22 h. Subsequently, additional Ni(cod)<sub>2</sub> (2.8 g, 10 mmol, 17 eq.) was added, and the mixture was stirred for further 40 h at 65 °C. The reaction mixture was diluted with EtOAc and washed with water and brine. The organic phase was dried over anhydrous Na<sub>2</sub>SO<sub>4</sub> and concentrated under reduced pressure. The residue was purified by silica gel column chromatography (*n*-hexane/CH<sub>2</sub>Cl<sub>2</sub> = 9/1) and GPC, which afforded a mixture of saddle-**Ant7** and twisted-**Ant7** as an orange solid (58 mg, 0.12 mmol, 21% calculated for two isomers).

twisted-**Ant7**; <sup>1</sup>H NMR (600 MHz, CD<sub>2</sub>Cl<sub>2</sub>, δ/ppm): δ 8.24 (dd, *J* = 6.9, 3.3 Hz, 2H), 7.74 (dd, *J* = 7.9, 1.2 Hz, 2H), 7.68 (dd, *J* = 7.9, 1.2 Hz, 2H), 7.50 (s, 2H), 7.46–7.43 (m, 4H), 7.36–7.32 (m, 4H), 7.28 (td, *J* = 7.6, 1.4 Hz, 2H), 7.14 (dd, *J* = 7.9, 1.0 Hz, 2H), 7.04 (dd, *J* = 7.9, 1.0 Hz, 2H); <sup>13</sup>C NMR (151 MHz, CD<sub>2</sub>Cl<sub>2</sub>, δ/ppm): 141.8, 139.2, 139.0, 138.8, 136.8, 135.9, 135.2, 133.1, 132.4, 131.4, 131.1, 129.6, 128.6, 128.4, 128.0, 127.9, 127.3, 125.8, 125.1; HR-APCI-orbitrapMS (*m/z*): [M + H]<sup>+</sup> calcd for C<sub>38</sub>H<sub>23</sub><sup>+</sup>, 479.1794; found, 479.1788.

saddle-**Ant7**; <sup>1</sup>H NMR (600 MHz, CD<sub>2</sub>Cl<sub>2</sub>, δ/ppm): δ 8.05 (dd, *J* = 6.7, 3.4 Hz, 2H), 7.85 (s, 2H), 7.83 (dd, *J* = 7.8, 1.5 Hz, 2H), 7.76 (dd, *J* = 7.9, 1.2 Hz, 2H), 7.51 (td, *J* = 7.5, 1.3 Hz, 2H), 7.45–7.41 (m, 4H), 7.34 (dd, *J* = 6.7, 3.2 Hz, 2H), 7.27–7.24 (m, 2H), 7.18 (dd, *J* = 7.7, 1.4 Hz, 2H), 6.94 (dd, *J* = 7.9, 1.2 Hz, 2H); HR-APCI-orbitrapMS (*m/z*): [M + H]<sup>+</sup> calcd for C<sub>38</sub>H<sub>23</sub><sup>+</sup>, 479.1794; found, 479.1788.

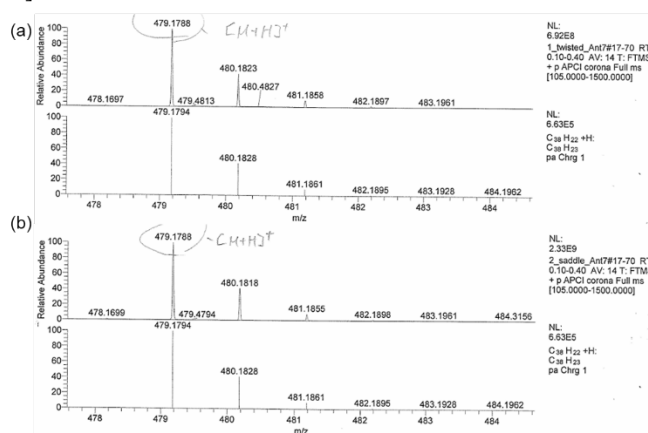

**Figure S16.** Observed and simulated high-resolution mass spectra of (a) twisted-**Ant7** and (b) saddle-**Ant7** (APCI-orbitrap, positive mode).

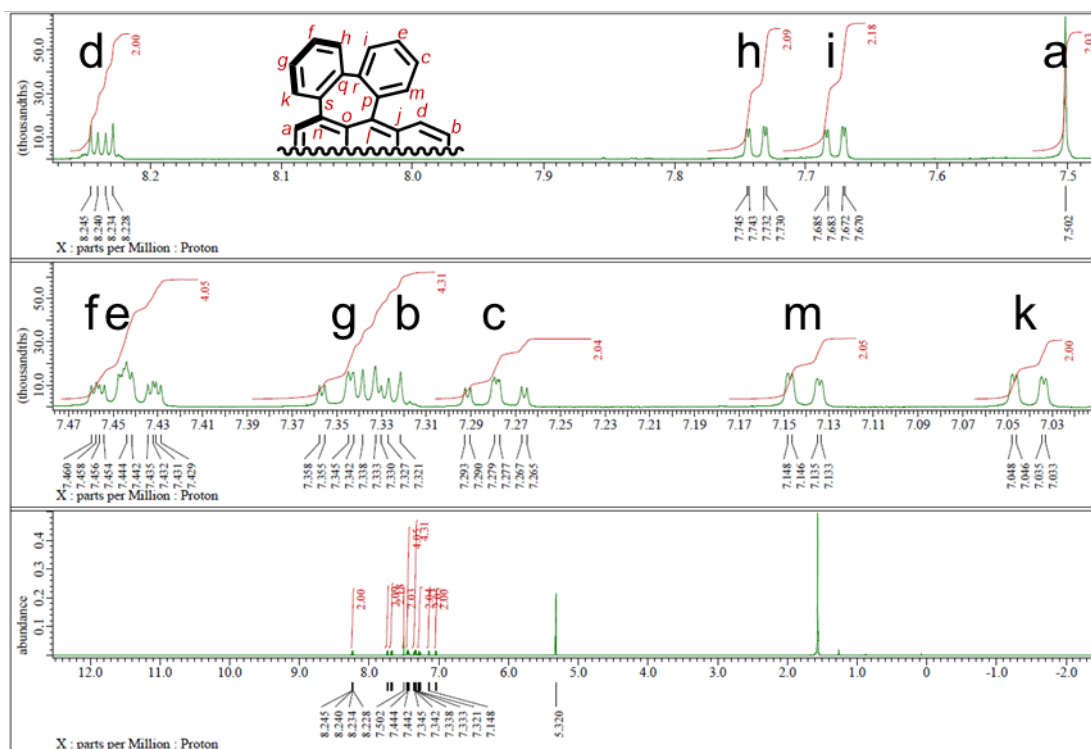

Figure S17.  $^1\text{H}$  NMR spectrum of twisted-Ant7 at room temperature ( $\text{CD}_2\text{Cl}_2$ , 600 MHz).

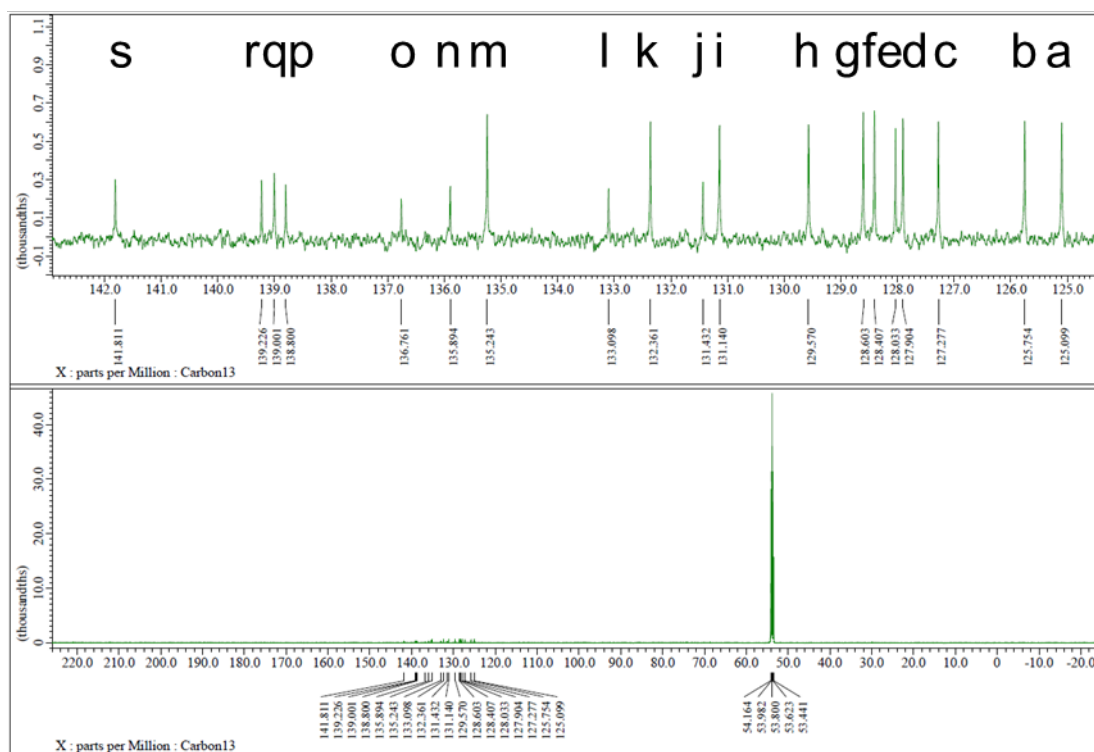

Figure S18.  $^{13}\text{C}$  NMR spectrum of twisted-Ant7 at room temperature ( $\text{CD}_2\text{Cl}_2$ , 151 MHz).

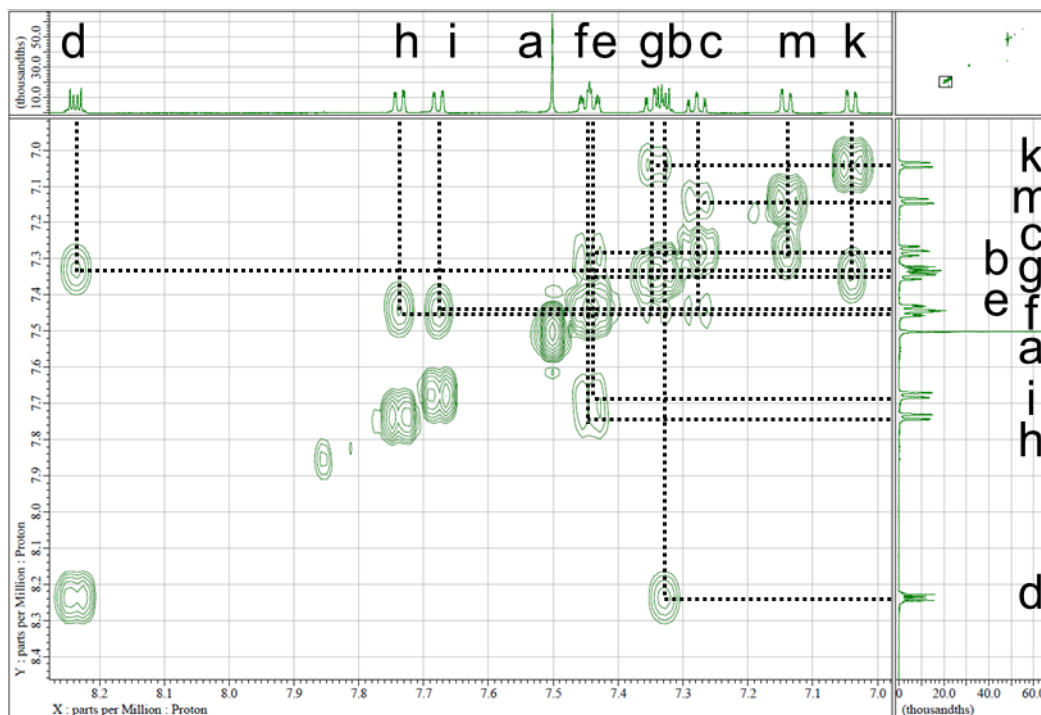

Figure S19.  $^1\text{H}$ - $^1\text{H}$  COSY spectrum of twisted-Ant7 at room temperature ( $\text{CD}_2\text{Cl}_2$ , 600 MHz).

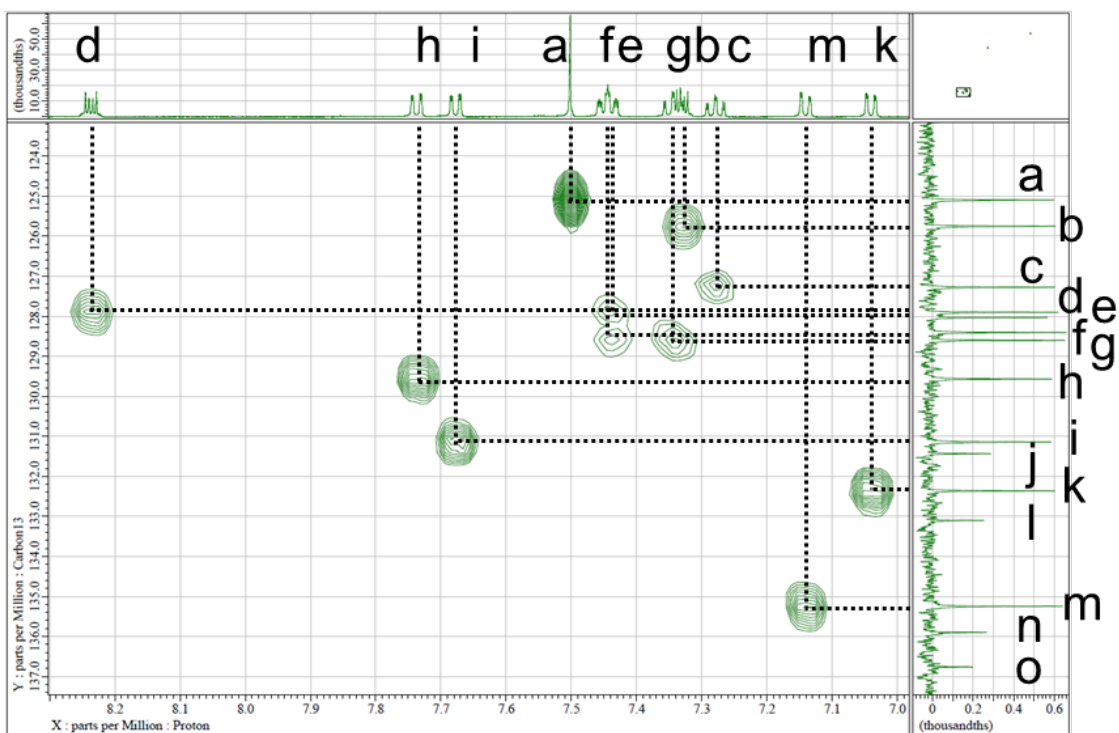

Figure S20.  $^{13}\text{C}/^1\text{H}$  HMQC spectrum of twisted-Ant7 at room temperature ( $\text{CD}_2\text{Cl}_2$ , 600 MHz).

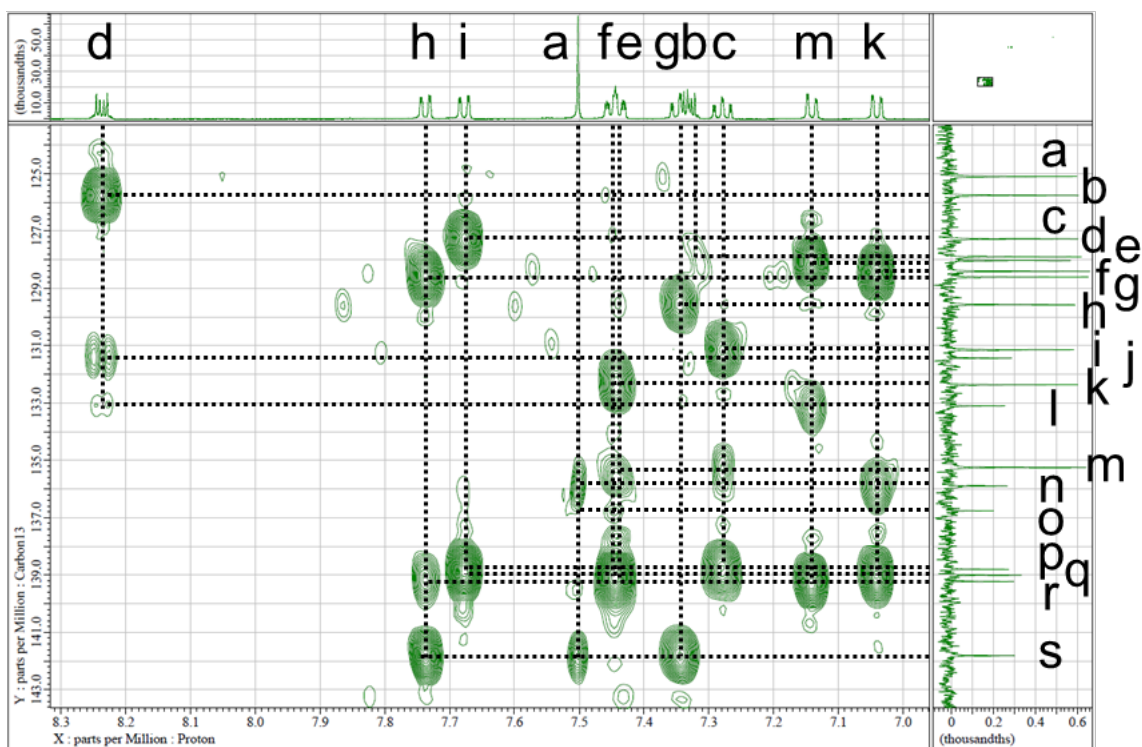

Figure S21.  $^{13}\text{C}/^1\text{H}$  HMBC spectrum of twisted-Ant7 at room temperature ( $\text{CD}_2\text{Cl}_2$ , 600 MHz).

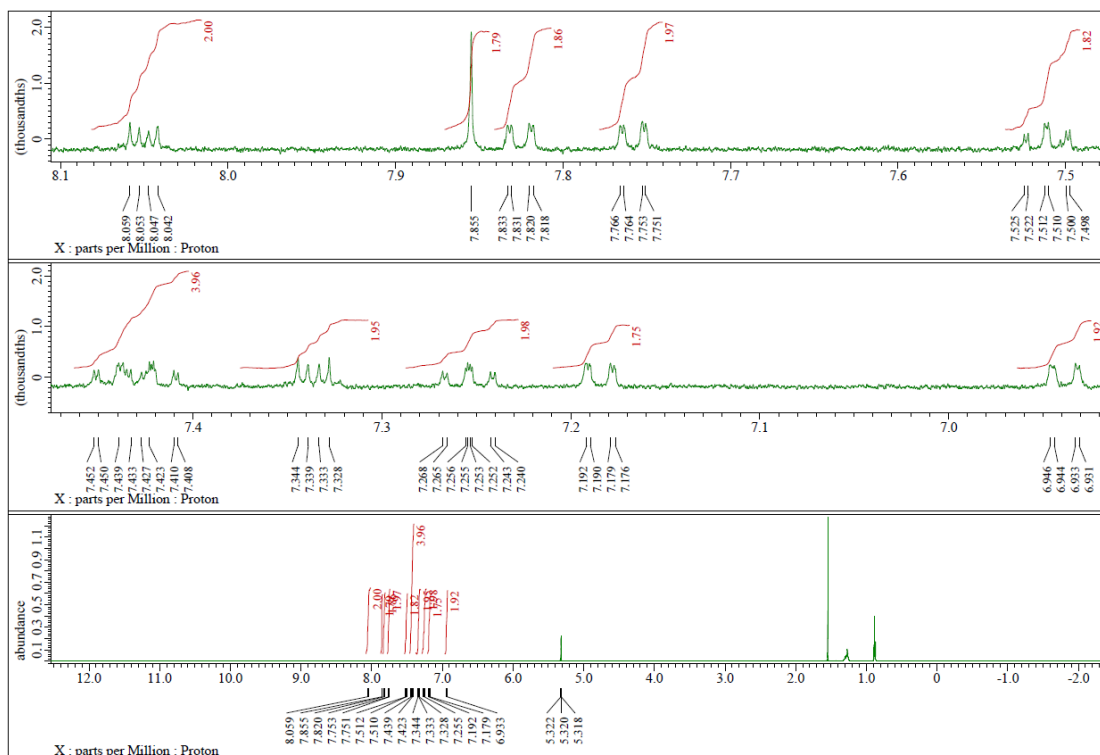

Figure S22.  $^1\text{H}$  NMR spectrum of saddle-Ant7 at room temperature ( $\text{CD}_2\text{Cl}_2$ , 600 MHz).

**Practical Considerations for Synthesis:** In the synthesis of **Naph7**, **Ant7**, and **Tet7**, the oxidative cyclization typically proceeds to full consumption of the precursor. However, the mass balance is dominated by a complex mixture of partially fused and dehalogenated byproducts. Due to the presence of multiple atropisomers with overlapping chromatographic profiles, the purification of the desired products from such byproducts requires meticulous silica gel column chromatography and recycle GPC-HPLC. This separation would be more difficult upon scale-up, and we recommend parallel small-scale reactions as a more practical approach for large-scale synthesis.

## 2. X-Ray Diffraction Analysis

X-Ray crystallographic data of a single crystal obtained by slow vapor diffusion were recorded using a Rigaku MicroMax 007-HF diffractometer equipped with a graphite monochromatic MoK $\alpha$  radiation source ( $\lambda = 0.71075$  Å) and a Rigaku Saturn724+ CCD detector. The structures were solved using direct methods (SHELXT-2014/5),<sup>S2</sup> and structural refinements were carried out using SHELXL-2018/3.<sup>S3</sup> The data for saddle-**Tet7** and twisted-**Tet7** refer to our previous report.<sup>S1</sup>

**Table S1.** Crystallographic parameters of single-crystal X-ray diffraction analysis for compounds **7**, twisted-**Naph7** and twisted-**Ant7**.

| compounds                                                   | <b>7</b>                                              | twisted- <b>Naph7</b>               | twisted- <b>Ant7</b>               |
|-------------------------------------------------------------|-------------------------------------------------------|-------------------------------------|------------------------------------|
| CCDC                                                        | 2534033                                               | 2534034                             | 2534035                            |
| chemical formula                                            | C <sub>34</sub> H <sub>20</sub> Cl <sub>4</sub> O     | 2(C <sub>17</sub> H <sub>10</sub> ) | C <sub>38</sub> H <sub>22</sub>    |
| formula weight                                              | 586.30                                                | 428.50                              | 478.55                             |
| <i>T</i> / K                                                | 143.15                                                | 143.15                              | 143.15                             |
| wavelength / Å                                              | 0.71073 (Mo K $\alpha$ )                              | 0.71073 (Mo K $\alpha$ )            | 0.71073 (Mo K $\alpha$ )           |
| color                                                       | Colorless                                             | Yellow                              | Orange                             |
| crystal size / mm <sup>3</sup>                              | 0.20 × 0.10 × 0.10                                    | 0.10 × 0.10 × 0.10                  | 0.10 × 0.03 × 0.01                 |
| crystal system                                              | orthorhombic                                          | monoclinic                          | monoclinic                         |
| space group                                                 | <i>P</i> 2 <sub>1</sub> 2 <sub>1</sub> 2 <sub>1</sub> | <i>I</i> 2/ <i>a</i>                | <i>P</i> 2 <sub>1</sub> / <i>n</i> |
| <i>a</i> / Å                                                | 15.6943(6)                                            | 13.3272(8)                          | 8.8393(7)                          |
| <i>b</i> / Å                                                | 13.6478(4)                                            | 18.4614(7)                          | 20.3510(15)                        |
| <i>c</i> / Å                                                | 12.3466(4)                                            | 18.4901(11)                         | 13.6545(10)                        |
| $\alpha$                                                    | 90°                                                   | 90°                                 | 90°                                |
| $\beta$                                                     | 90°                                                   | 110.580(7)                          | 100.868(8)                         |
| $\gamma$                                                    | 90°                                                   | 90°                                 | 90°                                |
| <i>V</i> / Å <sup>3</sup>                                   | 2644.55(15)                                           | 4259.0(4)                           | 2412.2(3)                          |
| <i>Z</i> (molecules/unit cell)                              | 4                                                     | 8                                   | 4                                  |
| Density (calculated)                                        | 1.473 g/cm <sup>3</sup>                               | 1.337 g/cm <sup>3</sup>             | 1.318 g/cm <sup>3</sup>            |
| Data/restraints/parameters                                  | 6968 / 18 / 386                                       | 5616 / 0 / 308                      | 6326 / 0 / 343                     |
| Goodness-of-fit on <i>F</i> <sup>2</sup>                    | 1.025                                                 | 1.173                               | 1.020                              |
| <i>R</i> <sub>1</sub> [ <i>I</i> > 2 $\sigma$ ( <i>I</i> )] | 0.0565                                                | 0.1360                              | 0.0947                             |
| <i>wR</i> <sub>2</sub> (for all data)                       | 0.1263                                                | 0.3576                              | 0.2212                             |
| Largest peak and hole /                                     | 0.686 and -0.406                                      | 0.685 and -0.479                    | 0.280 and -0.293                   |

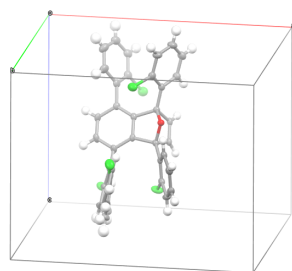

**Figure S23.** Asymmetric unit of **7** recorded at 143 K, showing a 50% probability of thermal ellipsoids.

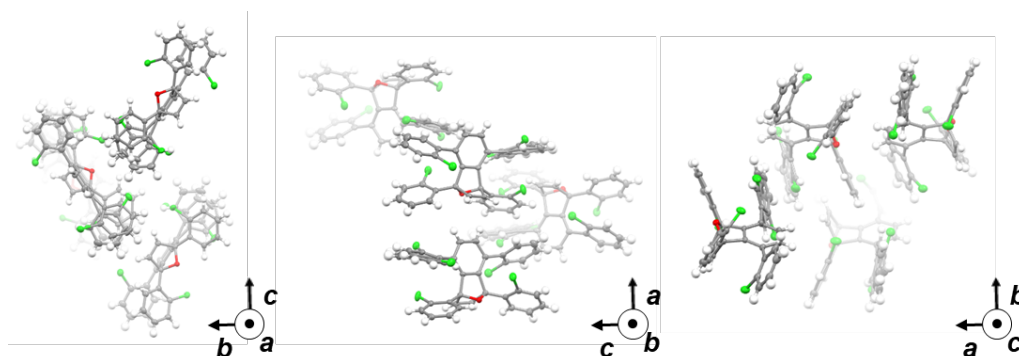

**Figure S24.** Crystal packing of **7** recorded at 143 K, showing a 50% probability of thermal ellipsoids.

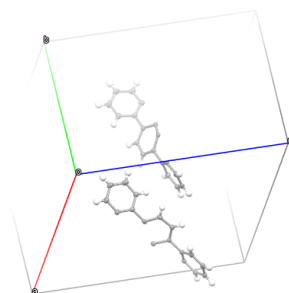

**Figure S25.** Asymmetric unit of twisted-Naph**7** recorded at 143 K, showing a 50% probability of thermal ellipsoids.

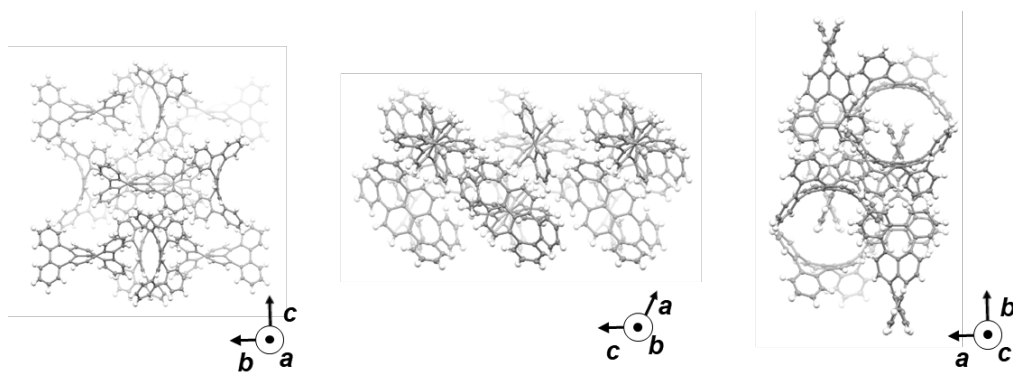

**Figure S26.** Crystal packing of twisted-Naph**7** recorded at 143 K, showing a 50% probability of thermal ellipsoids.

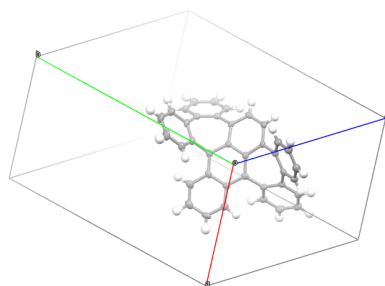

**Figure S27.** Asymmetric unit of twisted-**Ant7** recorded at 143 K, showing a 50% probability of thermal ellipsoids.

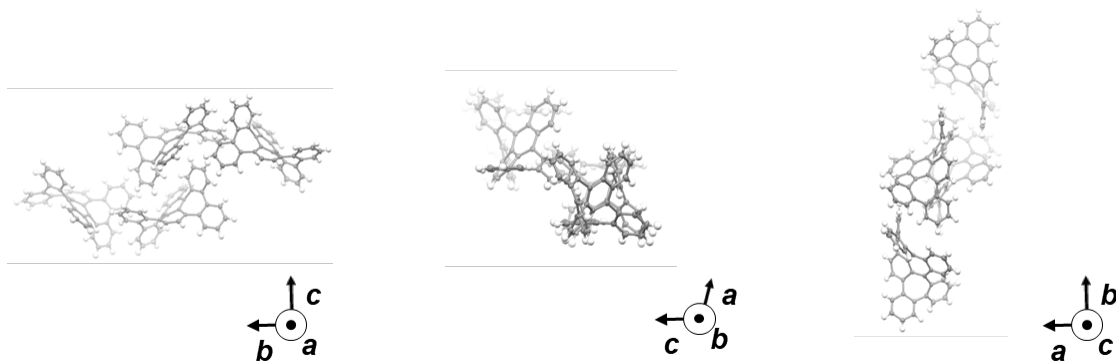

**Figure S28.** Crystal packing of twisted-**Ant7** recorded at 143 K, showing a 50% probability of thermal ellipsoids.

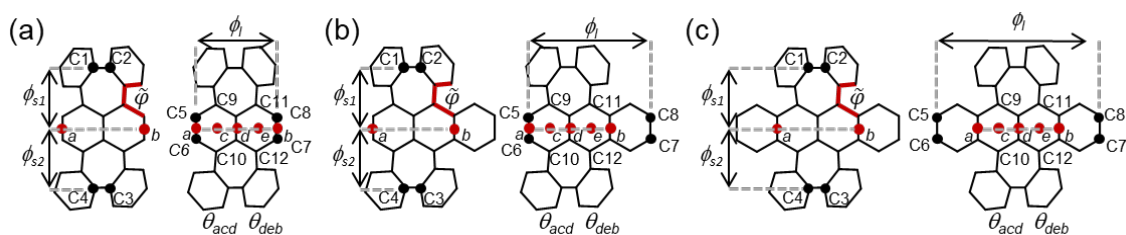

**Figure S29.** Definition of  $\phi_{s1}$ ,  $\phi_{s2}$ ,  $\tilde{\varphi}$ ,  $\phi$ ,  $\theta_{acd}$  and  $\theta_{deb}$  in the structure of (a) **Naph7**, (b) **Ant7**, (c) **Tet7**. Dots ( $a, b, d$ ) are the centroids of the C–C bonds, and dots ( $c, e$ ) are the centroid between C9 and C10 or C11 and C12, respectively.  $\phi_{s1}$ ,  $\phi_{s2}$  are torsion angles defined by two points and two atoms (C1, C2,  $b$ ,  $a$  or  $a$ ,  $b$ , C3, C4).  $\tilde{\varphi}$  is defined as an average torsion angle between the acene moiety and the fused diphenylene moieties.  $\phi$  is an end-to-end torsion angle defined by four carbon atoms at the edge of the acene moiety (C5, C6, C7, C8).  $\theta_{acd}$  and  $\theta_{deb}$  are angles defined by three points ( $a$ ,  $c$ ,  $d$  or  $d$ ,  $e$ ,  $b$ ).

**Table S2.** Comparison of  $\phi_{s1}$ ,  $\phi_{s2}$ ,  $\tilde{\varphi}$ ,  $\phi$ , MPD (all carbon),  $\theta_{acd}$ ,  $\theta_{deb}$ , MPD (acene moiety), and Ave. HOMA (acene moiety) in the X-ray and calculated structures of **Naph7**, **Ant7**, and **Tet7** at the B3LYP/6-31G(d) level.

| compd.                             | <b>Naph7</b>      |       |        |       | <b>Ant7</b> |       |        |       | <b>Tet7</b> |       |                   |       |      |      |
|------------------------------------|-------------------|-------|--------|-------|-------------|-------|--------|-------|-------------|-------|-------------------|-------|------|------|
|                                    | twist             |       | saddle |       | twist       |       | saddle |       | twist       |       | saddle            |       |      |      |
|                                    | exp. <sup>a</sup> | calc. | exp.   | calc. | exp.        | calc. | exp.   | calc. | exp.        | calc. | exp. <sup>a</sup> | calc. |      |      |
| $\phi_{s1}^b$                      | 54                | 54    | 53     | N/A   | -48         | 59    | 57     | N/A   | -51         | 61    | 60                | -53   | -53  | -53  |
| $\phi_{s2}^b$                      | 55                | 58    | 53     | N/A   | 48          | 58    | 57     | N/A   | 51          | 59    | 60                | 52    | 53   | 53   |
| $\tilde{\varphi}^b$                | 36                | 37    | 36     | N/A   | 35          | 41    | 41     | N/A   | 38          | 45    | 45                | 43    | 41   | 42   |
| $\phi^b$                           | 32                | 34    | 31     | N/A   | 0           | 30    | 29     | N/A   | 0           | 26    | 28                | 0     | 0    | 0    |
| MPD <sup>c</sup><br>(all carbon)   | 1.33              | 1.27  | 1.36   | N/A   | 0.50        | 1.24  | 1.21   | N/A   | 0.90        | 1.15  | 1.17              | 1.10  | 1.08 | 1.09 |
| $\theta_{acd}^b$                   | 179               | 179   | 180    | N/A   | 164         | 179   | 180    | N/A   | 166         | 180   | 180               | 161   | 161  | 161  |
| $\theta_{deb}^b$                   | 179               | 179   | 180    | N/A   | 164         | 180   | 180    | N/A   | 159         | 180   | 180               | 161   | 161  | 161  |
| MPD <sup>d</sup><br>(acene moiety) | 0.19              | 0.16  | 0.19   | N/A   | 0.08        | 0.19  | 0.19   | N/A   | 0.15        | 0.23  | 0.24              | 0.13  | 0.12 | 0.11 |
| Ave. HOMA<br>(acene moiety)        | 0.65              | 0.68  | 0.63   | N/A   | 0.60        | 0.63  | 0.56   | N/A   | 0.54        | 0.52  | 0.52              | 0.58  | 0.55 | 0.51 |

<sup>a</sup>two independent molecules in crystal, <sup>b</sup>values are in degrees, <sup>c</sup>calculated by all carbon atoms. values are in Å. <sup>d</sup>calculated by all carbon atoms of an acene moiety. values are in Å.  
N/A = Not Available

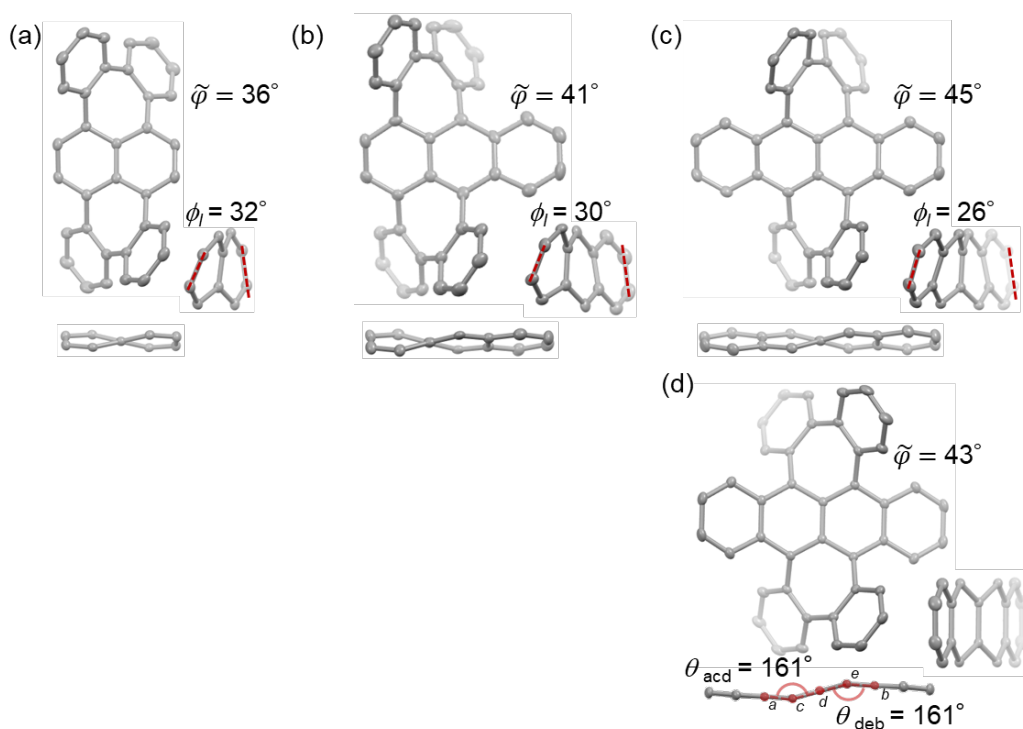

**Figure S30.** X-ray structures of (a) twisted-Naph7, (b) twisted-Ant7, (c) twisted-Tet7, and (d) saddle-Tet7.

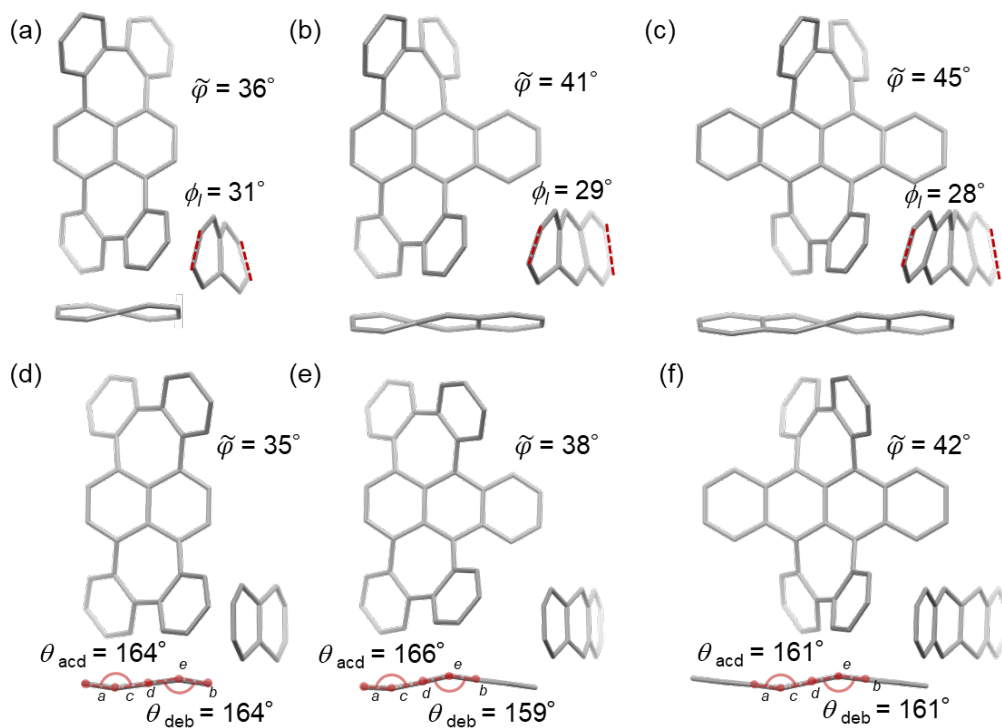

**Figure S31.** Calculated structures of (a) twisted-Naph7, (b) twisted-Ant7, (c) twisted-Tet7, (d) saddle-Naph7, (e) saddle-Ant7, and (f) saddle-Tet7 at the B3LYP/6-31G(d) level.

### 3. Kinetics of the isomerization pathway between saddle and twisted isomers

A residual solvent (5.32 ppm for  $^1\text{H}$  in dichloromethane- $d_2$ ) was used as an internal reference for NMR spectra. Dichloromethane- $d_2$  for NMR spectroscopy was purified by passing through a short aluminum oxide pad before use). The thermodynamics and kinetics of isomerization between the saddle and twisted isomers of **Naph7** and **Ant7** were studied by  $^1\text{H}$  NMR spectroscopy. A solution of **Naph7** showed only single peak by HPLC analysis in some conditions. VT-NMR measurement of **Naph7** in  $\text{CH}_2\text{Cl}_2$  did not change from 20 °C to -80 °C. (Figure S32) These results suggested two possibility: (i) **Naph7** predominantly exists as a single isomer in solution due to an significant energy difference between the major and minor conformers, and/or (ii) the interconversion between the isomers is too rapid on the NMR timescale due to the low isomerization barrier.

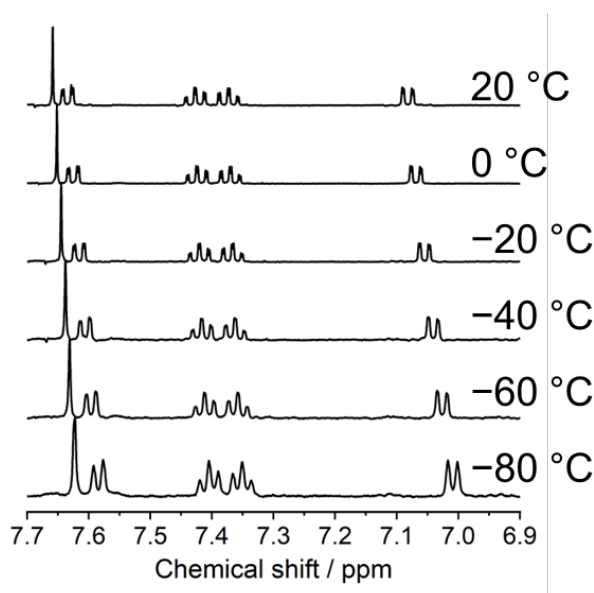

**Figure S32.** VT- $^1\text{H}$  NMR spectra of **Naph7** in dichloromethane- $d_2$  from 20 °C to -80 °C.

In the case of **Ant7**, twisted-**Ant7** and saddle-**Ant7** could be separated by HPLC (Figure S43). The concentration changes for isomerization between saddle and twisted isomers were measured, showing no intermediates or byproducts, indicating reversible first-order interconversion (Figure S33,S34). The solutions were stirred for adequate time (21 h at 25 °C, 85 h at 20 °C, 100 h at 15 °C), resulting in 0.131/1 at 25 °C, 0.125/1 at 20 °C, 0.123/1 at 15 °C of equilibrium mixture of saddle-**Ant7**/twisted-**Ant7**. In addition, the rate constants were determined by the following equation of reversible first-order interconversion.

$$\ln\left(\frac{[X]_0 - [X]_{\text{eq}}}{[X] - [X]_{\text{eq}}}\right) = (k_{\text{tw} \rightarrow \text{sa}} + k_{\text{sa} \rightarrow \text{tw}})t \quad (\text{S1})$$

where  $[X]$  is the concentration of saddle-**Ant7** at a certain time  $t$ ,  $[X]_0$  is the initial concentration,  $[X]_{\text{eq}}$  is the final (equilibrium) concentration, and  $k_{\text{tw} \rightarrow \text{sa}}$  and  $k_{\text{sa} \rightarrow \text{tw}}$  are the rate constants for the twisted-to-saddle and saddle-to-twisted isomerization, respectively. Using these data and the reaction equilibrium constant  $K$ , the rate constants  $k_{\text{sa} \rightarrow \text{tw}}$  ( $4.8 \times 10^{-5} \text{ s}^{-1}$  at 25 °C,  $3.0 \times 10^{-5} \text{ s}^{-1}$  at 20 °C, and  $1.9 \times 10^{-5} \text{ s}^{-1}$  at 15 °C) and  $k_{\text{tw} \rightarrow \text{sa}}$  ( $6.3 \times 10^{-6} \text{ s}^{-1}$  at 25 °C,  $3.8 \times 10^{-6} \text{ s}^{-1}$  at 20 °C, and  $2.4 \times 10^{-6} \text{ s}^{-1}$  at 15 °C) were determined (Figure S35). By Eyring plots using the  $^1\text{H}$  NMR spectral change of **Ant7** solutions in dichloromethane- $d_2$  at 25 °C, 20 °C, and 15 °C, the activation barrier ( $\Delta G^\ddagger$ ), enthalpy ( $\Delta H^\ddagger$ ), and entropy ( $\Delta S^\ddagger$ ) was determined to be 103.6 kJ·mol $^{-1}$  at 25°C, and 68.2 kJ·mol $^{-1}$  and  $-0.119 \text{ kJ}\cdot\text{mol}^{-1}\cdot\text{K}^{-1}$  for the twisted-to-saddle isomerization and 97.7 kJ·mol $^{-1}$  at 25°C, and 63.7 kJ·mol $^{-1}$ ,  $-0.114 \text{ kJ}\cdot\text{mol}^{-1}\cdot\text{K}^{-1}$  for the saddle-to-twisted isomerization, respectively (Figure S36).

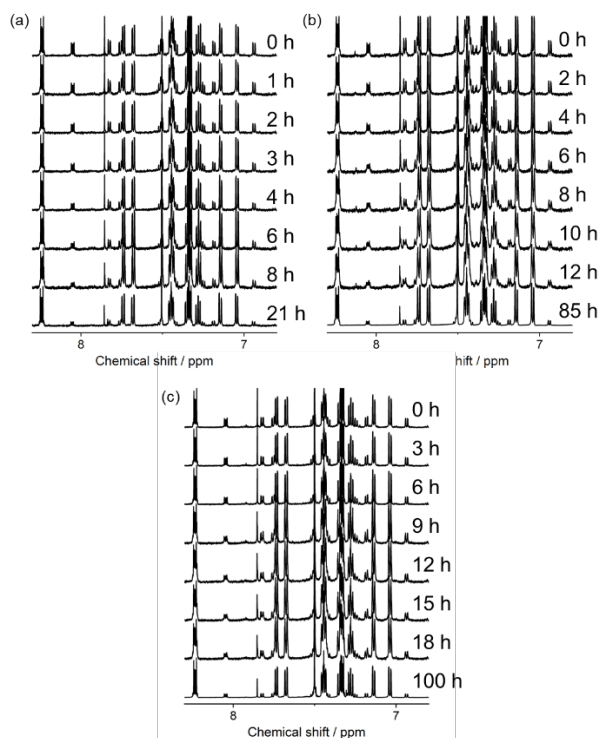

**Figure S33.**  $^1\text{H}$  NMR spectral change of saddle-**Ant7** and twisted-**Ant7** during the progress of saddle-to-twisted isomerization in dichloromethane- $d_2$  at (a) 25 °C, (b) 20 °C, and (c) 15 °C.

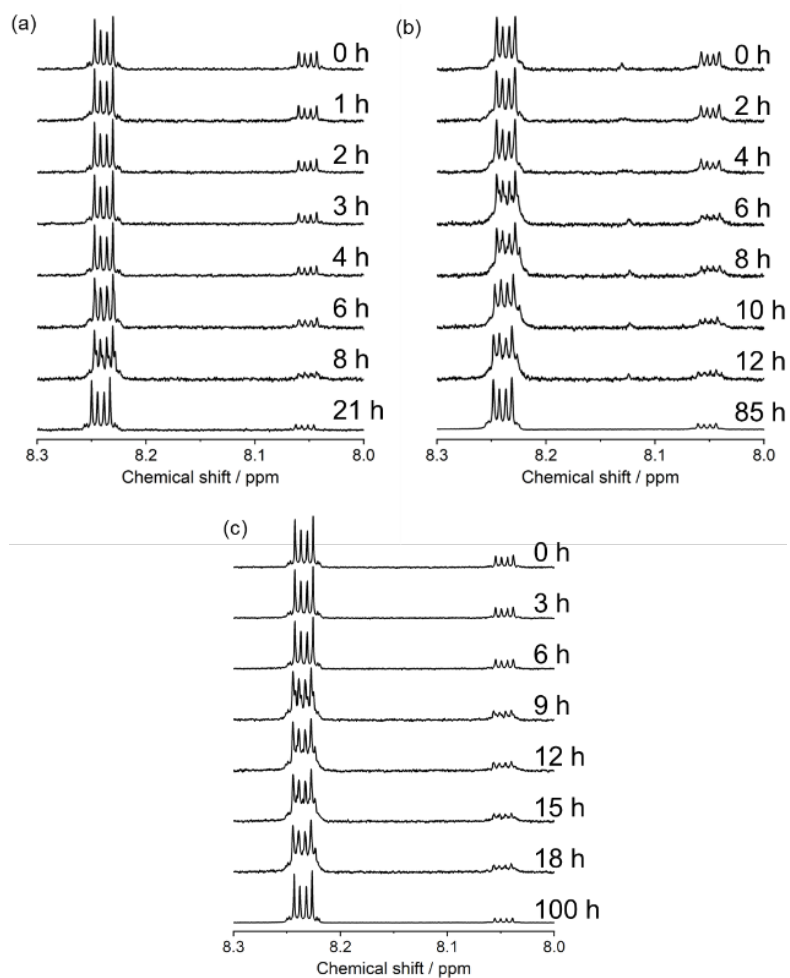

**Figure S34.** Extracted  $^1\text{H}$  NMR spectral change of saddle-**Ant7** and twisted-**Ant7** during the progress of saddle-to-twisted isomerization in dichloromethane- $d_2$  at (a) 25 °C, (b) 20 °C, and (c) 15 °C.

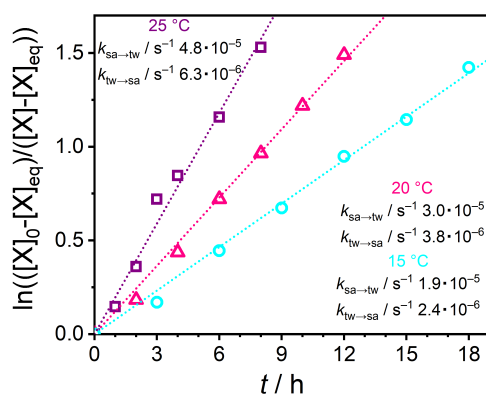

**Figure S35.** a plot for the isomerization of saddle-**Ant7** obtained by  $^1\text{H}$ -NMR studies.

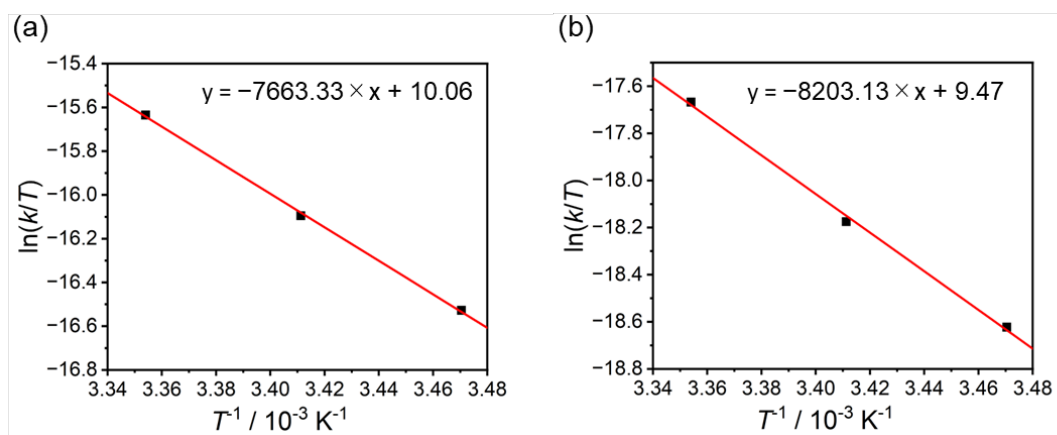

**Figure S36.** Eyring plots using the rate constants (a)  $k_{\text{sa} \rightarrow \text{tw}}$  and (b)  $k_{\text{tw} \rightarrow \text{sa}}$  determined by the  $^1\text{H}$  NMR spectral change of **Ant7** solutions in dichlorobenzene- $d_2$  at 25 °C, 20 °C, and 15 °C.

## 4. Absorption and Fluorescence Measurement

UV–vis. Absorption spectra were measured on a JASCO (V-670 equipped with an ETCS-761 Peltier-type temperature controller and V-750) spectrophotometer (conditions: scan rate, 400 nm/min; bandwidth, 5 nm). Fluorescence and excitation spectra were measured on a JASCO (FP-8300) spectrophotometer (conditions: scan rate, 100 nm/min; bandwidth, 1 nm). Fluorescence quantum yields were determined on a Hamamatsu Photonics absolute quantum yield measurement system C6620-02G. Fluorescence lifetimes were recorded on a Hamamatsu Photonics picosecond fluorescence lifetime measurement system C11200 equipped with a picosecond light pulser PLP-10, a spectrograph C11119-01, and a streakscope C10627. Excitation was carried out by a laser diode emitting at  $\lambda = 378$  nm for **Naph** and  $\lambda = 465$  nm for **Ant7**. Fluorescence emission ( $k_f$ ) and nonradiative decay ( $k_{nr}$ ) rate constants were calculated from the fluorescence quantum yield ( $\Phi_f$ ) and the fluorescence lifetime ( $\tau_f$ ) by using the following equations,

$$\Phi_f = \frac{k_f}{k_f + k_{nr}} = \tau_f k_f \quad (\text{S2}), \quad \tau_f = \frac{1}{k_f + k_{nr}} \quad (\text{S3})$$

Sample concentration was typically set around  $1 \times 10^{-6}$  M for fluorescence spectroscopy to avoid distortion of the spectrum by self-absorption. The optical data for twisted-**Ant7** and saddle-**Ant7** were recorded within 1 h.

UV–vis. absorption spectra of twisted-**Ant7** and saddle-**Ant7** were measured immediately after isomerization by HPLC and solvent removal by a vacuum pump. The molar absorption coefficients ( $\epsilon$ ) of both isomers in toluene were determined by combining global fitting with an equilibrium ratio. First, the absorption spectrum of the equilibrium mixture of twisted-**Ant7** and saddle-**Ant7** in toluene at rt was recorded, and the concentration of the solution was determined by a total weight of twisted-**Ant7** and saddle-**Ant7**. Second, the equilibrium spectrum was deconvoluted into the spectra of twisted-**Ant7** and saddle-**Ant7**. Third, the deconvoluted spectra were converted by dividing them by the equilibrium ratio of 0.877 (twisted-**Ant7**) and 0.123 (saddle-**Ant7**) in toluene at room temperature, respectively, as determined independently by  $^1\text{H}$  NMR spectroscopy. Finally, the molar absorption coefficients ( $\epsilon$ ) were calculated from using the concentrations and absorbance.

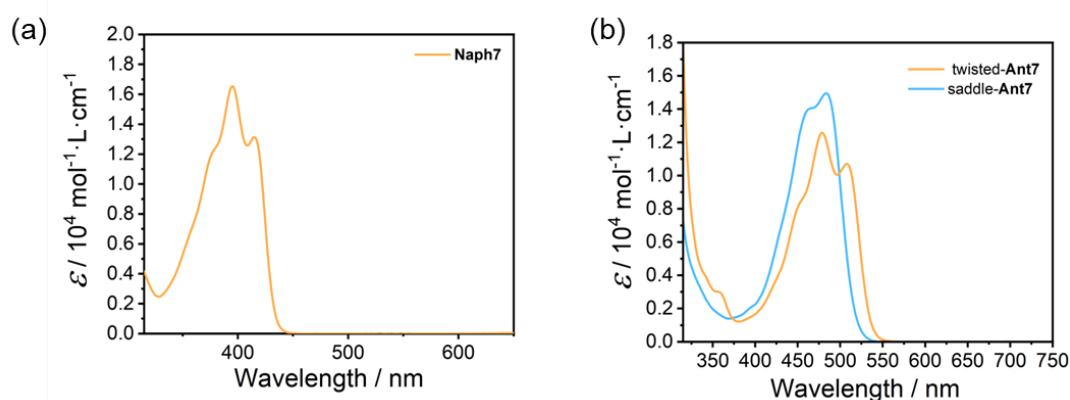

**Figure S37.** UV–vis. absorption spectra of (a) **Naph7** and (b) twisted-**Ant7** and saddle-**Ant7** in toluene.

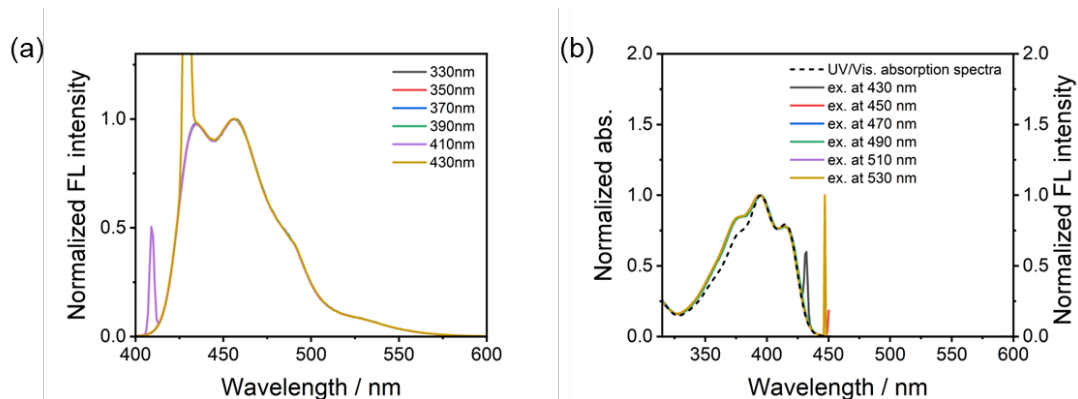

**Figure S38.** (a) Fluorescence and (b) excitation spectra of **Naph7** (fluorescence spectra: excitation at 330, 350, 370, 390, 410, and 430 nm; excitation spectra: recorded at 430, 450, 470, 490, 510, and 530 nm) in toluene.

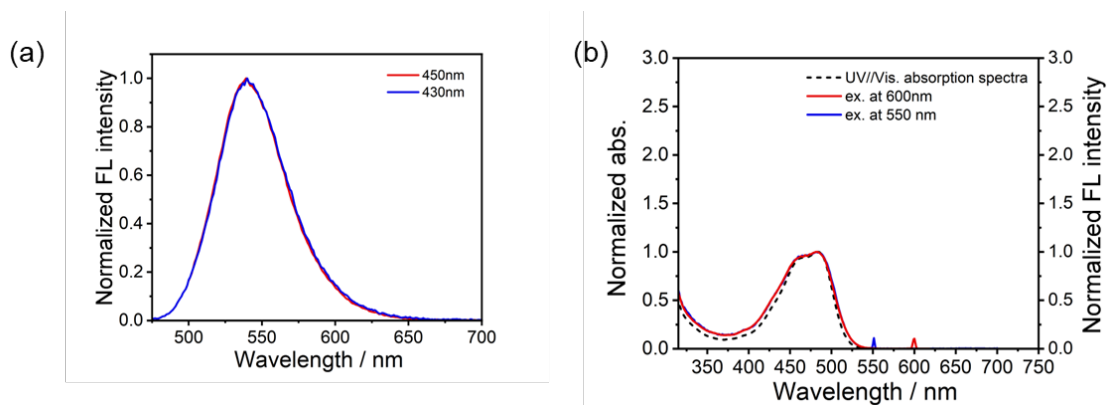

**Figure S39.** (a) Fluorescence and (b) excitation spectra of saddle-**Ant7** (fluorescence spectra: excitation at 430 and 450 nm; excitation spectra: recorded at 550 and 600 nm) in toluene.

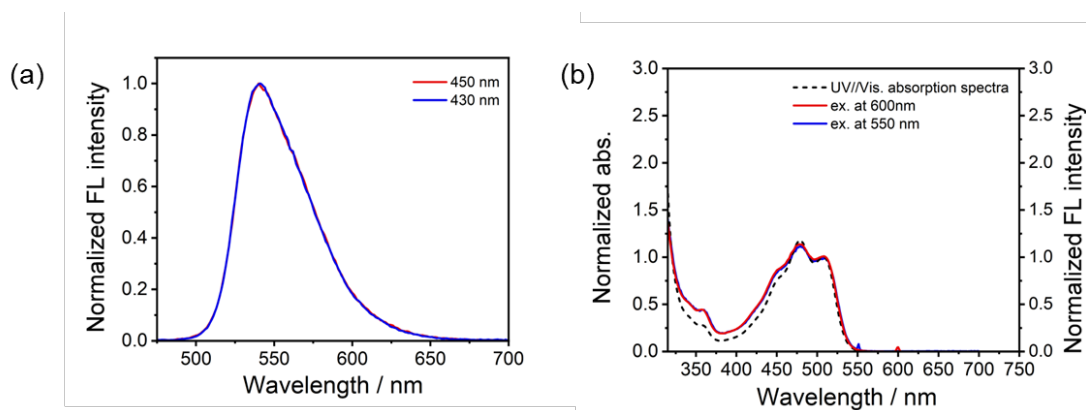

**Figure S40.** (a) Fluorescence and (b) excitation spectra of twisted-**Ant7** (fluorescence spectra: excitation at 430 and 450 nm; excitation spectra: recorded at 550 and 600 nm) in toluene.

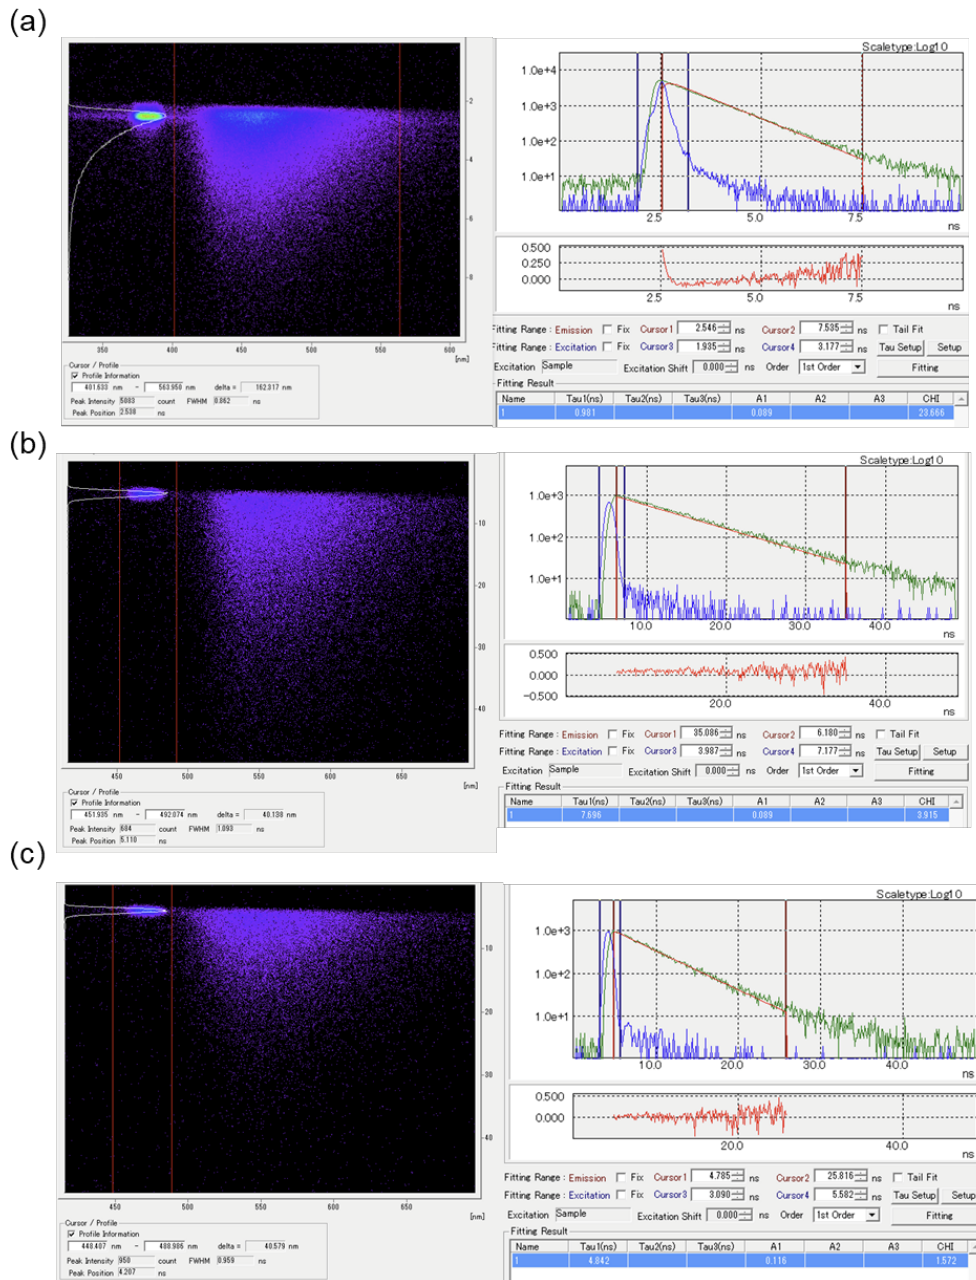

**Figure S41.** Streak images and fluorescence decay profiles of (a) **Naph7** and (b) twisted-**Ant7**, and (c) saddle-**Ant7**. Red lines denote the curves of the best fit by single exponential functions.

## 5. Chiral HPLC details and Circular Dichroism (CD) Analysis

The chirality of and heptagon-fused compounds (saddle-**Naph7**, twisted-**Naph7**, saddle-**Ant7**, twisted-**Ant7**, saddle-**Tet7** and twisted-**Tet7**) was specified by the longitudinal helicities of the two seven-membered ring moieties (Figure S42). The enantiomeric resolution of *rac*-twisted-**Ant7** and saddle-**Ant7** was performed using preparative HPLC on CHIRALPAK IB 250-10 (5  $\mu\text{m}$ ) with hexanes/ $\text{CH}_2\text{Cl}_2 = 85/15$  as an eluent (flow rate = 5 mL/min). Circular dichroism (CD) spectra of separated (*P,P*)-twisted-**Ant7** and (*M,M*)-twisted-**Ant7** were measured on a JASCO J-720WI (conditions: scan rate, 100 nm/min; response, 1 sec; slit width, 1 nm).

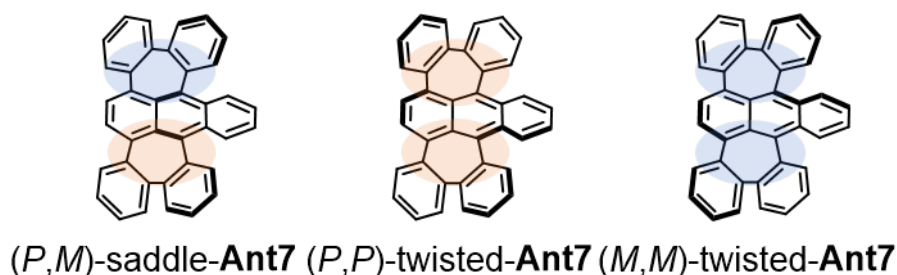

**Figure S42.** Description of the longitudinal helicities of seven-membered ring moieties of saddle-**Ant7** and twisted-**Ant7**.

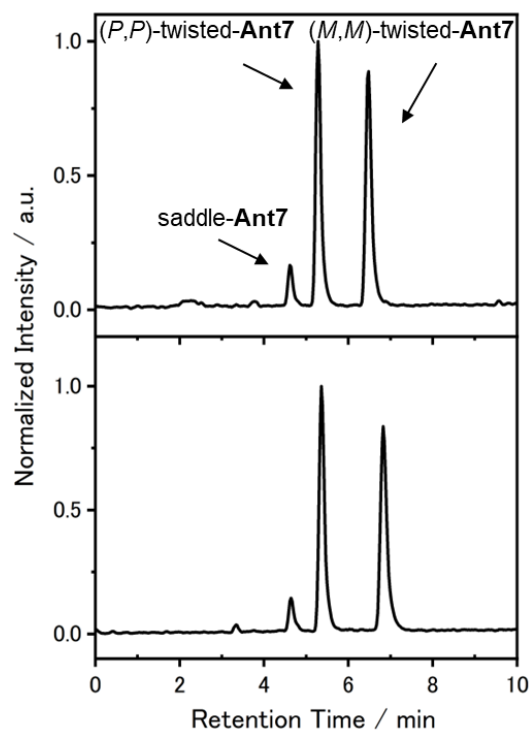

**Figure S43.** (a) Chiral HPLC chart for (a) an equilibrium solution of *rac*-twisted-**Ant7** and saddle-**Ant7**, (b) a separated solution of 1<sup>st</sup> fraction (saddle-**Ant7**) after 45 h at room temperature.

## 6. Theoretical Calculations

(TD-)DFT calculations were conducted using the Gaussian 16 program (revision C.01).<sup>S4</sup>

Convergence at a local minimum structure was confirmed by the absence of imaginary frequencies in the frequency analysis.

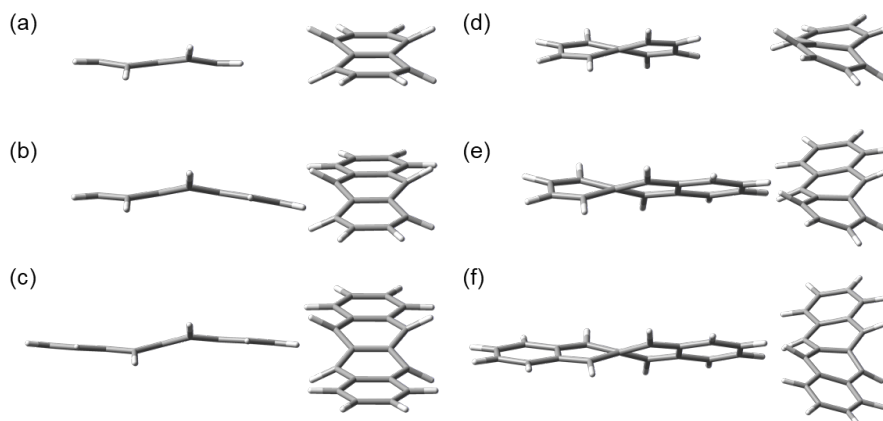

**Figure S44.** Calculated structures of (a) saddle-**Naph7-H**, (b) saddle-**Ant7-H**, (c) saddle-**Tet7-H**, (d) twisted-**Naph7-H**, (e) twisted-**Ant7-H**, and (f) twisted-**Tet7-H**. The extracted acenes were generated by substituting the diphenylene moieties of energy-minimized structures of **Naph7**, **Ant7**, and **Tet7**, calculated at the B3LYP/6-31G(d) level, with hydrogen atoms. The C–H bond lengths at substituted positions were fixed at 1.084 Å.

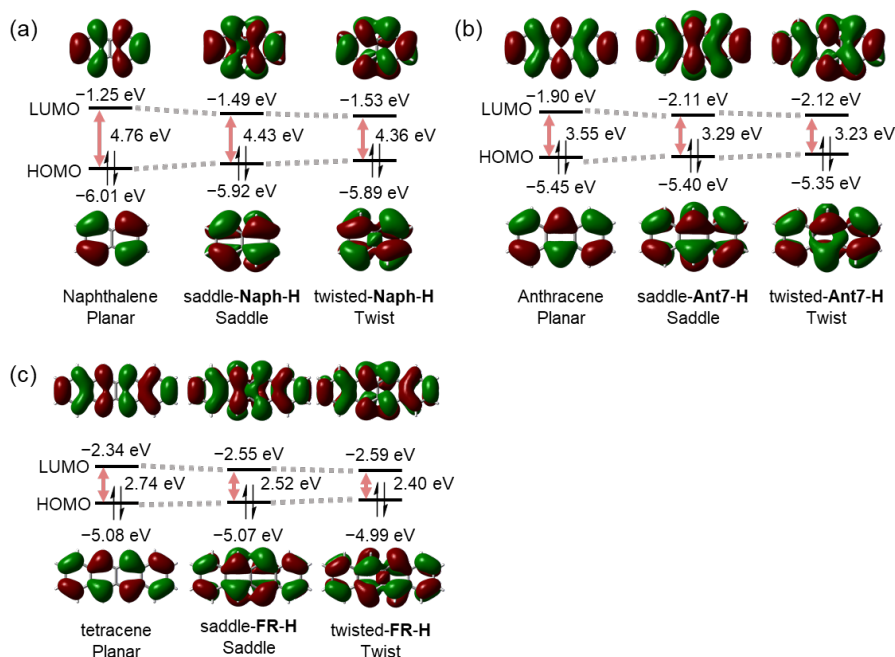

**Figure S45.** Molecular orbital diagram of (a) (energy-minimized) naphthalene, saddle-**Naph-H**, and twisted-**Naph-H**, (b) (energy-minimized) anthracene, saddle-**Ant-H**, and twisted-**Ant-H**, and (c) (energy-minimized) tetracene, saddle-**Tet7-H**, and twisted-**Tet7-H**. Single point calculations of naphthalene, anthracene, and tetracene were performed at the B3LYP/6-31G(d)//B3LYP/6-311G(2d,p) level. Single point calculations of the other structures were performed at the B3LYP/6-311G(2d,p) level.

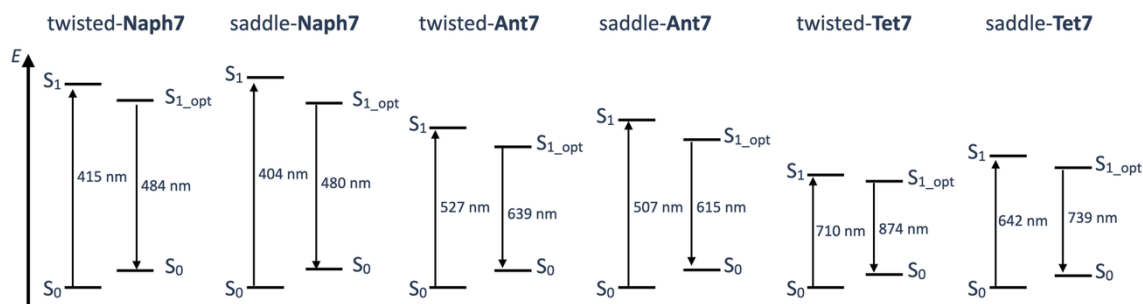

**Figure S46.** Calculated lowest-energy electronic transitions of **Naph7**, **Ant7**, and **Tet7** based on the energy-minimized  $S_0$  and  $S_1$  geometry. Calculations were conducted at the TD-B3LYP/6-31G(d)//B3LYP/6-311G(2d,p) level.

**Table S3.** Calculated  $\Delta E_{\text{HL}}$ ,  $\Delta\Delta E_{\text{HL}}$ ,  $\Delta E_{\text{dist}}$ , and  $\Delta E_{\pi\text{-ext}}$  of naphthalene, saddle-**Naph7**, twisted-**Naph7** and their hydrogen-substituted analogues (saddle-**Naph7-H** and twisted-**Naph7-H**) calculated at the B3LYP/6-31G(d)//B3LYP-6-311G(2d,p) level.

| compound                | $\Delta E_{\text{HL}}$ | $\Delta E_{\text{HL}} - \Delta E_{\text{HL, naphthalene}}$ | $\Delta\Delta E_{\text{HL}} - \Delta E_{\text{dist}}$ |
|-------------------------|------------------------|------------------------------------------------------------|-------------------------------------------------------|
| naphthalene             | 4.76                   | ---                                                        | ---                                                   |
| saddle- <b>Naph7-H</b>  | 4.43                   | $-0.33 = \Delta E_{\text{dist}}$                           | ---                                                   |
| twisted- <b>Naph7-H</b> | 4.36                   | $-0.40 = \Delta E_{\text{dist}}$                           | ---                                                   |
| saddle- <b>Naph7</b>    | 3.48                   | $-1.28 = \Delta\Delta E_{\text{HL}}$                       | $-0.95 = \Delta E_{\text{ir-ext}}$                    |
| twisted- <b>Naph7</b>   | 3.42                   | $-1.34 = \Delta\Delta E_{\text{HL}}$                       | $-0.94 = \Delta E_{\text{ir-ext}}$                    |

**Table S4.** Calculated  $\Delta E_{\text{HL}}$ ,  $\Delta\Delta E_{\text{HL}}$ ,  $\Delta E_{\text{dist}}$ , and  $\Delta E_{\pi\text{-ext}}$  of anthracene, saddle-**Ant7**, twisted-**Ant7** and their hydrogen-substituted analogues (saddle-**Ant7-H** and twisted-**Ant7-H**) calculated at the B3LYP/6-31G(d)//B3LYP-6-311G(2d,p) level.

| compound               | $\Delta E_{\text{HL}}$ | $\Delta E_{\text{HL}} - \Delta E_{\text{HL, anthracene}}$ | $\Delta\Delta E_{\text{HL}} - \Delta E_{\text{dist}}$ |
|------------------------|------------------------|-----------------------------------------------------------|-------------------------------------------------------|
| anthracene             | 3.55                   | ---                                                       | ---                                                   |
| saddle- <b>Ant7-H</b>  | 3.29                   | $-0.26 = \Delta E_{\text{dist}}$                          | ---                                                   |
| twisted- <b>Ant7-H</b> | 3.23                   | $-0.32 = \Delta E_{\text{dist}}$                          | ---                                                   |
| saddle- <b>Ant7</b>    | 2.78                   | $-0.78 = \Delta\Delta E_{\text{HL}}$                      | $-0.52 = \Delta E_{\text{ir-ext}}$                    |

---

twisted-**Ant7**

2.75

$-0.80 = \Delta E_{\text{HL}}$

$-0.48 = \Delta E_{\text{rxt}}$

---

**Table S5.** Calculated  $\Delta E_{\text{HL}}$ ,  $\Delta\Delta E_{\text{HL}}$ ,  $\Delta E_{\text{dist}}$ , and  $\Delta E_{\pi\text{-ext}}$  of tetracene, saddle-**Tet7**, twisted-**Tet7** and their hydrogen-substituted analogues (saddle-**Tet7-H** and twisted-**Tet7-H**) calculated at the B3LYP/6-31G(d)//B3LYP-6-311G(2d,p) level.

| compound               | $\Delta E_{\text{HL}}$ | $\Delta E_{\text{HL}} - \Delta E_{\text{HL, tetracene}}$ | $\Delta\Delta E_{\text{HL}} - \Delta E_{\text{dist}}$ |
|------------------------|------------------------|----------------------------------------------------------|-------------------------------------------------------|
| tetracene              | 2.74                   | ---                                                      | ---                                                   |
| saddle- <b>Tet7-H</b>  | 2.52                   | $-0.22 = \Delta E_{\text{dist}}$                         | ---                                                   |
| twisted- <b>Tet7-H</b> | 2.40                   | $-0.34 = \Delta E_{\text{dist}}$                         | ---                                                   |
| saddle- <b>Tet7</b>    | 2.22                   | $-0.52 = \Delta\Delta E_{\text{HL}}$                     | $-0.30 = \Delta E_{\pi\text{-ext}}$                   |
| twisted- <b>Tet7</b>   | 2.11                   | $-0.63 = \Delta\Delta E_{\text{HL}}$                     | $-0.29 = \Delta E_{\pi\text{-ext}}$                   |

## 7. Supporting References

- S1. M. Hisada, K. Bulgarevich, Y. Tsutsui, K. Miyata, D. Shimizu, S. Seki, K. Takimiya, K. Matsuda. Fused Rubrene Derivatives with Embedded Seven-membered Rings: Curvature-dependent Photophysical and Semiconductor Properties, *J. Am. Chem. Soc.* **2026**, *148*, 6716–6726.
- S2. G. M. Sheldrick, SHELXT - Integrated space-group and crystal-structure determination. *Acta Cryst.* **2015**, *A71*, 3–8.
- S3. G. M. Sheldrick, Crystal structure refinement with SHELXL. *Acta Cryst.* **2015**, *C71*, 3–8.
- S4. Gaussian 16, Revision C.01, M. J. Frisch, G. W. Trucks, H. B. Schlegel, G. E. Scuseria, M. A. Robb, J. R. Cheeseman, G. Scalmani, V. Barone, G. A. Petersson, H. Nakatsuji, X. Li, M. Caricato, A. V. Marenich, J. Bloino, B. G. Janesko, R. Gomperts, B. Mennucci, H. P. Hratchian, J. V. Ortiz, A. F. Izmaylov, J. L. Sonnenberg, D. Williams-Young, F. Ding, F. Lipparini, F. Egidi, J. Goings, B. Peng, A. Petrone, T. Henderson, D. Ranasinghe, V. G. Zakrzewski, J. Gao, N. Rega, G. Zheng, W. Liang, M. Hada, M. Ehara, K. Toyota, R. Fukuda, J. Hasegawa, M. Ishida, T. Nakajima, Y. Honda, O. Kitao, H. Nakai, T. Vreven, K. Throssell, J. A., Jr. Montgomery, J. E. Peralta, F. Ogliaro, M. J. Bearpark, J. J. Heyd, E. N. Brothers, K. N. Kudin, V. N. Staroverov, T. A. Keith, R. Kobayashi, J. Normand, K. Raghavachari, A. P. Rendell, J. C. Burant, S. S. Iyengar, J. Tomasi, M. J. Cossi, M. Millam, M. Klene, C. Adamo, R. Cammi, J. W. Ochterski, R. L. Martin, K. Morokuma, O. Farkas, J. B. Foresman, D. J. Fox, Gaussian, Inc., Wallingford CT, 2016.

## 8. Molecular Geometries, Excitations, and Thermodynamic Parameters by Theoretical Calculations

Atomic numbers 1, 6, and 7 correspond to hydrogen, carbon, and nitrogen, respectively.

**Table S6.** Molecular geometries, excitations, and thermodynamic parameters of the optimized structure of (*P,P*)-twisted-Naph7 in the global minimum state ( $S_0$ ) calculated at the B3LYP/6-31G(d) level of theory. Frequency vibrational and TD-DFT calculations were performed at B3LYP/6-311G(2d,p).

| -----         |               |             |                         |           |           | Ground to excited state transition electric dipole moments (Au):     |         |         |         |         |         |         |  |
|---------------|---------------|-------------|-------------------------|-----------|-----------|----------------------------------------------------------------------|---------|---------|---------|---------|---------|---------|--|
| Center Number | Atomic Number | Atomic Type | Coordinates (Angstroms) |           |           | state                                                                | X       | Y       | Z       | Dip. S. | Osc.    |         |  |
|               |               |             | X                       | Y         | Z         |                                                                      |         |         |         |         |         |         |  |
| 1             | 6             | 0           | 1.399451                | -0.279810 | 1.237176  | 1                                                                    | 2.1608  | 0.0000  | -0.0001 | 4.6690  | 0.3414  |         |  |
| 2             | 6             | 0           | 0.676365                | -0.188294 | 2.416045  | 2                                                                    | 0.0000  | 0.1318  | 0.0000  | 0.0174  | 0.0014  |         |  |
| 3             | 6             | 0           | -0.676324               | 0.188174  | 2.416064  | 3                                                                    | 0.0000  | -0.0000 | 0.2982  | 0.0889  | 0.0080  |         |  |
| 4             | 6             | 0           | -1.399428               | 0.279745  | 1.237211  | 4                                                                    | -0.0000 | -0.0000 | 0.2170  | 0.0471  | 0.0043  |         |  |
| 5             | 6             | 0           | 2.733398                | -0.942673 | 1.258232  | 5                                                                    | -0.0000 | 0.3299  | 0.0000  | 0.1088  | 0.0102  |         |  |
| 6             | 6             | 0           | -2.733361               | 0.942636  | 1.258302  | 6                                                                    | 0.0000  | -0.0000 | 0.0000  | 0.0000  | 0.0000  |         |  |
| 7             | 6             | 0           | 3.836129                | -0.590849 | 0.446863  | 7                                                                    | 0.0000  | 0.6983  | 0.0000  | 0.4877  | 0.0479  |         |  |
| 8             | 6             | 0           | 5.009175                | -1.364749 | 0.522961  | 8                                                                    | -0.2940 | 0.0000  | 0.0001  | 0.0864  | 0.0085  |         |  |
| 9             | 6             | 0           | 5.125329                | -2.448955 | 1.385229  | 9                                                                    | -0.0001 | 0.0000  | 0.4388  | 0.1925  | 0.0203  |         |  |
| 10            | 6             | 0           | 4.044714                | -2.790772 | 2.197132  | 10                                                                   | -0.0000 | -0.0000 | 0.5064  | 0.2564  | 0.0275  |         |  |
| 11            | 6             | 0           | 2.869664                | -2.051622 | 2.118475  | 11                                                                   | 0.0000  | -0.0000 | 0.0000  | 0.0000  | 0.0000  |         |  |
| 12            | 6             | 0           | -2.869596               | 2.051554  | 2.118591  | 12                                                                   | 1.9311  | 0.0000  | -0.0000 | 3.7291  | 0.4066  |         |  |
| 13            | 6             | 0           | -4.044616               | 2.790749  | 2.197263  | 13                                                                   | 0.0000  | -0.0000 | 0.0000  | 0.0000  | 0.0000  |         |  |
| 14            | 6             | 0           | -5.125233               | 2.449016  | 1.385326  | 14                                                                   | -0.0075 | 0.0000  | -0.5051 | 0.2552  | 0.0288  |         |  |
| 15            | 6             | 0           | -5.009114               | 1.364837  | 0.523019  | 15                                                                   | 1.4436  | 0.0000  | -0.0023 | 2.0839  | 0.2351  |         |  |
| 16            | 6             | 0           | -3.836102               | 0.590885  | 0.446912  | 16                                                                   | -0.0000 | -0.0001 | 0.0000  | 0.0000  | 0.0000  |         |  |
| 17            | 6             | 0           | 0.717165                | -0.000019 | -0.000006 | Ground to excited state transition velocity dipole moments (Au):     |         |         |         |         |         |         |  |
| 18            | 6             | 0           | -0.717165               | -0.000020 | 0.000007  | state                                                                | X       | Y       | Z       | Dip. S. | Osc.    |         |  |
| 19            | 6             | 0           | -1.399451               | -0.279795 | -1.237179 | 1                                                                    | -0.2374 | -0.0000 | 0.0000  | 0.0564  | 0.3427  |         |  |
| 20            | 6             | 0           | -0.676365               | -0.188265 | -2.416048 | 2                                                                    | -0.0000 | -0.0160 | -0.0000 | 0.0003  | 0.0014  |         |  |
| 21            | 6             | 0           | 0.676324                | 0.188203  | -2.416062 | 3                                                                    | -0.0000 | -0.0000 | -0.0416 | 0.0017  | 0.0085  |         |  |
| 22            | 6             | 0           | 1.399428                | 0.279760  | -1.237207 | 4                                                                    | 0.0000  | 0.0000  | -0.0282 | 0.0008  | 0.0039  |         |  |
| 23            | 6             | 0           | -2.733398               | -0.942658 | -1.258244 | 5                                                                    | 0.0000  | -0.0463 | -0.0000 | 0.0021  | 0.0101  |         |  |
| 24            | 6             | 0           | 2.733361                | 0.942651  | -1.258289 | 6                                                                    | -0.0000 | 0.0000  | -0.0000 | 0.0000  | 0.0000  |         |  |
| 25            | 6             | 0           | 3.836103                | 0.590891  | -0.446905 | 7                                                                    | -0.0000 | -0.1074 | -0.0000 | 0.0115  | 0.0522  |         |  |
| 26            | 6             | 0           | 5.009114                | 1.364843  | -0.523004 | 8                                                                    | 0.0412  | -0.0000 | -0.0000 | 0.0017  | 0.0076  |         |  |
| 27            | 6             | 0           | 5.125233                | 2.449033  | -1.385298 | 9                                                                    | 0.0000  | -0.0000 | -0.0699 | 0.0049  | 0.0206  |         |  |
| 28            | 6             | 0           | 4.044616                | 2.790776  | -2.197229 | 10                                                                   | 0.0000  | 0.0000  | -0.0829 | 0.0069  | 0.0285  |         |  |
| 29            | 6             | 0           | 2.869595                | 2.051580  | -2.118565 | 11                                                                   | -0.3169 | -0.0000 | 0.0000  | 0.1004  | 0.4095  |         |  |
| 30            | 6             | 0           | -2.869664               | -2.051596 | -2.118501 | 12                                                                   | -0.0000 | 0.0000  | -0.0000 | 0.0000  | 0.0000  |         |  |
| 31            | 6             | 0           | -4.044714               | -2.790745 | -2.197166 | 13                                                                   | 0.0013  | -0.0000 | 0.0850  | 0.0072  | 0.0285  |         |  |
| 32            | 6             | 0           | -5.125329               | -2.448938 | -1.385258 | 14                                                                   | -0.2434 | -0.0000 | 0.0004  | 0.0592  | 0.2334  |         |  |
| 33            | 6             | 0           | -5.009175               | -1.364743 | -0.522976 | 15                                                                   | 0.0000  | 0.0000  | -0.0000 | 0.0000  | 0.0000  |         |  |
| 34            | 6             | 0           | -3.836128               | -0.590844 | -0.446870 | 16                                                                   | 0.0000  | 0.0000  | 0.0000  | 0.0000  | 0.0000  |         |  |
| 35            | 1             | 0           | 1.170674                | -0.386551 | 3.362067  | Ground to excited state transition magnetic dipole moments (Au):     |         |         |         |         |         |         |  |
| 36            | 1             | 0           | -1.170617               | 0.386390  | 3.362103  | state                                                                | X       | Y       | Z       |         |         |         |  |
| 37            | 1             | 0           | 5.839876                | -1.112858 | -0.129030 | 1                                                                    | -0.3137 | 0.0000  | -0.0000 |         |         |         |  |
| 38            | 1             | 0           | 6.043615                | -3.029278 | 1.409369  | 2                                                                    | 0.0000  | 2.4722  | 0.0000  |         |         |         |  |
| 39            | 1             | 0           | 4.103192                | -3.643573 | 2.867991  | 3                                                                    | -0.0000 | -0.0000 | 0.8146  |         |         |         |  |
| 40            | 1             | 0           | 2.014223                | -2.357045 | 2.711984  | 4                                                                    | -0.0001 | -0.0000 | 1.0569  |         |         |         |  |
| 41            | 1             | 0           | -2.014151               | 2.356922  | 2.712122  | 5                                                                    | 0.0000  | 1.1267  | 0.0000  |         |         |         |  |
| 42            | 1             | 0           | -4.103069               | 3.643520  | 2.868161  | 6                                                                    | -0.0000 | -0.0000 | 0.0000  |         |         |         |  |
| 43            | 1             | 0           | -6.043491               | 3.029383  | 1.409470  | 7                                                                    | 0.0000  | 0.4793  | 0.0000  |         |         |         |  |
| 44            | 1             | 0           | -5.839816               | 1.113005  | -0.128994 | 8                                                                    | -0.0640 | -0.0000 | 0.0001  |         |         |         |  |
| 45            | 1             | 0           | -1.170674               | -0.386510 | -3.362072 | 9                                                                    | 0.0001  | 0.0000  | -1.1531 |         |         |         |  |
| 46            | 1             | 0           | 1.170618                | 0.386431  | -3.362098 | 10                                                                   | -0.0000 | -0.0000 | 0.6105  |         |         |         |  |
| 47            | 1             | 0           | 5.839817                | 1.113004  | 0.129005  | 11                                                                   | -0.0000 | 0.0000  | 0.0000  |         |         |         |  |
| 48            | 1             | 0           | 6.043491                | 3.029399  | -1.409435 | 12                                                                   | -0.2730 | -0.0000 | -0.0003 |         |         |         |  |
| 49            | 1             | 0           | 4.103067                | 3.643556  | -2.868117 | 13                                                                   | -0.0000 | -0.0000 | 0.0000  |         |         |         |  |
| 50            | 1             | 0           | 2.014150                | 2.356955  | -2.712091 | 14                                                                   | 0.0009  | 0.0000  | -1.2384 |         |         |         |  |
| 51            | 1             | 0           | -2.014224               | -2.357011 | -2.712015 | 15                                                                   | -0.1700 | -0.0000 | -0.0062 |         |         |         |  |
| 52            | 1             | 0           | -4.103193               | -3.643537 | -2.868037 | 16                                                                   | 0.0000  | 0.0001  | 0.0000  |         |         |         |  |
| 53            | 1             | 0           | -6.043615               | -3.029261 | -1.409405 | Ground to excited state transition velocity quadrupole moments (Au): |         |         |         |         |         |         |  |
| 54            | 1             | 0           | -5.839876               | -1.112860 | 0.129018  | state                                                                | XX      | YY      | ZZ      | XY      | XZ      | YZ      |  |
|               |               |             |                         |           |           | 1                                                                    | 0.0000  | -0.0000 | 0.0000  | -0.0000 | -0.0000 | 0.3958  |  |
|               |               |             |                         |           |           | 2                                                                    | -0.0000 | -0.0000 | 0.0000  | 0.0000  | 0.0788  | 0.0000  |  |
|               |               |             |                         |           |           | 3                                                                    | -0.0000 | -0.0000 | 0.0000  | 0.1172  | -0.0000 | 0.0000  |  |
|               |               |             |                         |           |           | 4                                                                    | -0.0000 | 0.0000  | 0.0000  | 0.3591  | 0.0000  | -0.0000 |  |
|               |               |             |                         |           |           | 5                                                                    | -0.0001 | -0.0000 | 0.0000  | -0.0000 | 0.2386  | -0.0000 |  |
|               |               |             |                         |           |           | 6                                                                    | 0.7575  | 0.0581  | -0.1980 | 0.0000  | 0.0000  | 0.0000  |  |
|               |               |             |                         |           |           | 7                                                                    | 0.0001  | -0.0000 | -0.0000 | -0.0000 | 0.6579  | 0.0000  |  |
|               |               |             |                         |           |           | 8                                                                    | -0.0000 | 0.0000  | -0.0000 | 0.0000  | 0.0000  | -0.2213 |  |
|               |               |             |                         |           |           | 9                                                                    | -0.0000 | -0.0000 | 0.0000  | 0.0651  | 0.0000  | -0.0000 |  |
|               |               |             |                         |           |           | 10                                                                   | -0.0000 | -0.0000 | -0.0000 | 0.1483  | -0.0000 | -       |  |
|               |               |             |                         |           |           | 11                                                                   | 0.2955  | 0.1786  | 0.0050  | 0.0000  | 0.0000  | -0.0000 |  |
|               |               |             |                         |           |           | 0.0000                                                               |         |         |         |         |         |         |  |

  

| -----                                        |              |                    |                     |
|----------------------------------------------|--------------|--------------------|---------------------|
| SCF Done:                                    | E(RB3LYP) =  | -1307.68858551     | A.U. after 6 cycles |
| imaginary vibration =                        | 0            |                    |                     |
| Zero-point correction=                       | 0.425195     | (Hartree/Particle) |                     |
| Thermal correction to Energy=                | 0.447448     |                    |                     |
| Thermal correction to Enthalpy=              | 0.448392     |                    |                     |
| Thermal correction to Gibbs Free Energy=     | 0.376140     |                    |                     |
| Sum of electronic and zero-point Energies=   | -1307.587648 |                    |                     |
| Sum of electronic and thermal Energies=      | -1307.565394 |                    |                     |
| Sum of electronic and thermal Enthalpies=    | -1307.564450 |                    |                     |
| Sum of electronic and thermal Free Energies= | -1307.636702 |                    |                     |

|                                                                                   |           |           |           |             |           |               |     |           |           |           |          |
|-----------------------------------------------------------------------------------|-----------|-----------|-----------|-------------|-----------|---------------|-----|-----------|-----------|-----------|----------|
| 12                                                                                | -0.0000   | -0.0000   | 0.0000    | -0.0001     | 0.0000    | Excited State | 3:  | Singlet-A | 3.6840 eV | 336.55 nm | f=0.0080 |
| 0.4559                                                                            |           |           |           |             |           | <S**2>=0.000  |     |           |           |           |          |
| 13                                                                                | 0.4440    | 0.3370    | -0.0941   | 0.0000      | -0.0000   | 108 ->113     |     |           | 0.34900   |           |          |
| 0.0000                                                                            |           |           |           |             |           | 112 ->115     |     |           | 0.53079   |           |          |
| 14                                                                                | 0.0000    | 0.0000    | -0.0000   | -1.3567     | -0.0000   | 112 ->116     |     |           | -0.29489  |           |          |
| 0.0028                                                                            |           |           |           |             |           |               |     |           |           |           |          |
| 15                                                                                | -0.0000   | -0.0000   | 0.0000    | -0.0068     | -0.0000   | Excited State | 4:  | Singlet-A | 3.7366 eV | 331.81 nm | f=0.0043 |
| 0.5403                                                                            |           |           |           |             |           | <S**2>=0.000  |     |           |           |           |          |
| 16                                                                                | -0.6077   | -0.2845   | -0.0242   | 0.0000      | -0.0001   | 108 ->113     |     |           | -0.20379  |           |          |
| 0.0000                                                                            |           |           |           |             |           | 112 ->115     |     |           | 0.42532   |           |          |
|                                                                                   |           |           |           |             |           | 112 ->116     |     |           | 0.50696   |           |          |
| Rotatory Strengths (R) in cgs (10** <sup>-40</sup> erg-esu-cm/Gauss)              |           |           |           |             |           |               |     |           |           |           |          |
| state                                                                             | XX        | YY        | ZZ        | R(velocity) | E-M Angle | Excited State | 5:  | Singlet-A | 3.8423 eV | 322.68 nm | f=0.0102 |
| 1                                                                                 | -0.0000   | -62.8827  | 543.1298  | 160.0824    | 90.00     | <S**2>=0.000  |     |           |           |           |          |
| 2                                                                                 | -113.1139 | -0.0000   | -120.5592 | -77.8911    | 90.00     | 111 ->113     |     |           | 0.64561   |           |          |
| 3                                                                                 | -101.2345 | -75.7697  | 0.0000    | -59.0014    | 90.00     | 112 ->117     |     |           | -0.27399  |           |          |
| 4                                                                                 | -102.9564 | -50.7411  | -0.0000   | -51.2325    | 90.00     |               |     |           |           |           |          |
| 5                                                                                 | -102.8917 | -0.0000   | -158.1682 | -87.0200    | 90.00     | Excited State | 6:  | Singlet-A | 3.8812 eV | 319.44 nm | f=0.0000 |
| 6                                                                                 | -0.0000   | -0.0000   | 0.0000    | -0.0000     | 90.00     | <S**2>=0.000  |     |           |           |           |          |
| 7                                                                                 | 46.0605   | -0.0000   | -293.2836 | -82.4077    | 90.00     | 110 ->113     |     |           | 0.69565   |           |          |
| 8                                                                                 | -0.0000   | -28.0141  | 15.4399   | -4.1914     | 90.00     |               |     |           |           |           |          |
| 9                                                                                 | 170.0189  | 190.3565  | 0.0000    | 120.1251    | 90.00     | Excited State | 7:  | Singlet-A | 4.0054 eV | 309.54 nm | f=0.0479 |
| 10                                                                                | -138.2488 | -84.2017  | -0.0000   | -74.1502    | 90.00     | <S**2>=0.000  |     |           |           |           |          |
| 11                                                                                | 0.0000    | -0.0000   | 0.0000    | 0.0000      | 90.00     | 109 ->114     |     |           | 0.18271   |           |          |
| 12                                                                                | -0.0000   | -125.2936 | 499.4974  | 124.7346    | 90.00     | 111 ->113     |     |           | 0.25428   |           |          |
| 13                                                                                | 0.0000    | -0.0000   | -0.0000   | -0.0000     | 90.00     | 112 ->117     |     |           | 0.62319   |           |          |
| 14                                                                                | -460.9465 | 21.0097   | 0.0097    | -146.6424   | 179.10    |               |     |           |           |           |          |
| 15                                                                                | -0.0107   | -188.3055 | 361.2692  | 57.6510     | 2.18      | Excited State | 8:  | Singlet-A | 4.0375 eV | 307.08 nm | f=0.0085 |
| 16                                                                                | 0.0000    | 0.0000    | 0.0000    | 0.0000      | 90.00     | <S**2>=0.000  |     |           |           |           |          |
|                                                                                   |           |           |           |             |           | 109 ->113     |     |           | 0.69521   |           |          |
| Rotatory Strengths (R) in cgs (10** <sup>-40</sup> erg-esu-cm/Gauss)              |           |           |           |             |           |               |     |           |           |           |          |
| state                                                                             | XX        | YY        | ZZ        | R(length)   |           | Excited State | 9:  | Singlet-A | 4.3060 eV | 287.94 nm | f=0.0203 |
| 1                                                                                 | 479.3009  | -0.0000   | -0.0000   | 159.7670    |           | <S**2>=0.000  |     |           |           |           |          |
| 2                                                                                 | -0.0000   | -230.4781 | -0.0000   | -76.8260    |           | 107 ->113     |     |           | -0.26605  |           |          |
| 3                                                                                 | 0.0000    | -0.0000   | -171.8036 | -57.2679    |           | 108 ->113     |     |           | -0.36665  |           |          |
| 4                                                                                 | -0.0000   | -0.0000   | -162.1747 | -54.0582    |           | 110 ->114     |     |           | 0.44162   |           |          |
| 5                                                                                 | 0.0000    | -262.8437 | -0.0000   | -87.6146    |           | 112 ->116     |     |           | -0.16471  |           |          |
| 6                                                                                 | 0.0000    | -0.0000   | -0.0000   | -0.0000     |           | 112 ->119     |     |           | -0.21418  |           |          |
| 7                                                                                 | -0.0000   | -236.6904 | -0.0000   | -78.8968    |           |               |     |           |           |           |          |
| 8                                                                                 | -13.3116  | 0.0000    | -0.0000   | -4.4372     |           | Excited State | 10: | Singlet-A | 4.3767 eV | 283.28 nm | f=0.0275 |
| 9                                                                                 | 0.0000    | -0.0000   | 357.7989  | 119.2663    |           | <S**2>=0.000  |     |           |           |           |          |
| 10                                                                                | -0.0000   | -0.0000   | -218.6322 | -72.8774    |           | 107 ->113     |     |           | -0.28231  |           |          |
| 11                                                                                | 0.0000    | 0.0000    | -0.0000   | 0.0000      |           | 108 ->113     |     |           | -0.22540  |           |          |
| 12                                                                                | 372.8619  | 0.0000    | -0.0000   | 124.2873    |           | 110 ->114     |     |           | -0.17869  |           |          |
| 13                                                                                | 0.0000    | -0.0000   | -0.0000   | -0.0000     |           | 112 ->116     |     |           | -0.19721  |           |          |
| 14                                                                                | 0.0049    | -0.0000   | -442.3397 | -147.4449   |           | 112 ->119     |     |           | 0.51831   |           |          |
| 15                                                                                | 173.5787  | 0.0000    | -0.0103   | 57.8562     |           |               |     |           |           |           |          |
| 16                                                                                | 0.0000    | 0.0000    | -0.0000   | 0.0000      |           | Excited State | 11: | Singlet-A | 4.3934 eV | 282.21 nm | f=0.0000 |
|                                                                                   |           |           |           |             |           | <S**2>=0.000  |     |           |           |           |          |
|                                                                                   |           |           |           |             |           | 106 ->113     |     |           | -0.26061  |           |          |
| 1                                                                                 | -0.5130   | -0.0000   | -0.0000   | 0.5130      | 0.3420    | 107 ->114     |     |           | 0.11696   |           |          |
| 2                                                                                 | -0.0000   | -0.0021   | -0.0000   | 0.0021      | 0.0014    | 111 ->115     |     |           | 0.12324   |           |          |
| 3                                                                                 | -0.0000   | 0.0000    | -0.0124   | 0.0124      | 0.0083    | 112 ->118     |     |           | 0.62317   |           |          |
| 4                                                                                 | -0.0000   | -0.0000   | -0.0061   | 0.0061      | 0.0041    |               |     |           |           |           |          |
| 5                                                                                 | -0.0000   | -0.0153   | -0.0000   | 0.0153      | 0.0102    | Excited State | 12: | Singlet-A | 4.4499 eV | 278.62 nm | f=0.4066 |
| 6                                                                                 | -0.0000   | -0.0000   | -0.0000   | 0.0000      | 0.0000    | <S**2>=0.000  |     |           |           |           |          |
| 7                                                                                 | -0.0000   | -0.0750   | -0.0000   | 0.0750      | 0.0500    | 111 ->114     |     |           | 0.63251   |           |          |
| 8                                                                                 | -0.0121   | -0.0000   | -0.0000   | 0.0121      | 0.0081    | 112 ->120     |     |           | -0.24382  |           |          |
| 9                                                                                 | -0.0000   | -0.0000   | -0.0307   | 0.0307      | 0.0205    |               |     |           |           |           |          |
| 10                                                                                | -0.0000   | -0.0000   | -0.0420   | 0.0420      | 0.0280    | Excited State | 13: | Singlet-A | 4.5663 eV | 271.52 nm | f=0.0000 |
| 11                                                                                | -0.0000   | -0.0000   | -0.0000   | 0.0000      | 0.0000    | <S**2>=0.000  |     |           |           |           |          |
| 12                                                                                | -0.6120   | -0.0000   | -0.0000   | 0.6120      | 0.4080    | 106 ->113     |     |           | 0.55997   |           |          |
| 13                                                                                | -0.0000   | -0.0000   | -0.0000   | 0.0000      | 0.0000    | 108 ->114     |     |           | 0.26765   |           |          |
| 14                                                                                | -0.0000   | -0.0000   | -0.0429   | 0.0429      | 0.0286    | 111 ->115     |     |           | 0.21316   |           |          |
| 15                                                                                | -0.3513   | -0.0000   | -0.0000   | 0.3513      | 0.2342    | 111 ->116     |     |           | -0.16615  |           |          |
| 16                                                                                | -0.0000   | -0.0000   | -0.0000   | 0.0000      | 0.0000    | 112 ->118     |     |           | 0.16976   |           |          |
| Excitation energies and oscillator strengths:                                     |           |           |           |             |           |               |     |           |           |           |          |
| Excited State                                                                     | 1:        | Singlet-A | 2.9842 eV | 415.47 nm   | f=0.3414  | Excited State | 14: | Singlet-A | 4.6021 eV | 269.41 nm | f=0.0288 |
| <S**2>=0.000                                                                      |           |           |           |             |           | <S**2>=0.000  |     |           |           |           |          |
| 112 ->113                                                                         |           | 0.69945   |           |             |           | 107 ->113     |     |           | 0.45420   |           |          |
| This state for optimization and/or second-order correction.                       |           |           |           |             |           |               |     |           |           |           |          |
| Total Energy, E(TD-HF/TD-DFT) = -1307.90317475                                    |           |           |           |             |           |               |     |           |           |           |          |
| Copying the excited state density for this state as the 1-particle RhoCI density. |           |           |           |             |           |               |     |           |           |           |          |
| Excited State                                                                     | 2:        | Singlet-A | 3.2537 eV | 381.05 nm   | f=0.0014  | Excited State | 15: | Singlet-A | 4.6040 eV | 269.30 nm | f=0.2351 |
| <S**2>=0.000                                                                      |           |           |           |             |           | <S**2>=0.000  |     |           |           |           |          |
| 112 ->114                                                                         |           | 0.70391   |           |             |           | 105 ->113     |     |           | -0.12226  |           |          |
|                                                                                   |           |           |           |             |           | 111 ->114     |     |           | 0.26341   |           |          |
|                                                                                   |           |           |           |             |           | 112 ->120     |     |           | 0.63314   |           |          |
| Excited State                                                                     | 16:       | Singlet-A | 4.6441 eV | 266.97 nm   | f=0.0000  | Excited State | 16: | Singlet-A | 4.6441 eV | 266.97 nm | f=0.0000 |
| <S**2>=0.000                                                                      |           |           |           |             |           | <S**2>=0.000  |     |           |           |           |          |

106 ->113 -0.27994  
 107 ->114 -0.14376

108 ->114 0.57363  
 111 ->116 -0.21502

**Table S7.** Molecular geometries, excitations, and thermodynamic parameters of the optimized structure of saddle-Naph7 in a local minimum state (S<sub>0</sub>) calculated at the B3LYP/6-31G(d) level of theory. Frequency vibrational and TD-DFT calculations were performed at B3LYP/6-311G(2d,p).

| Center Number | Atomic Number | Atomic Type | Coordinates (Angstroms) |           |           |
|---------------|---------------|-------------|-------------------------|-----------|-----------|
|               |               |             | X                       | Y         | Z         |
| 1             | 6             | 0           | -1.423518               | -1.068048 | -0.662210 |
| 2             | 6             | 0           | -0.700123               | -1.865541 | -1.539789 |
| 3             | 6             | 0           | 0.700110                | -1.865538 | -1.539794 |
| 4             | 6             | 0           | 1.423513                | -1.068049 | -0.662218 |
| 5             | 6             | 0           | -2.766845               | -1.548278 | -0.229589 |
| 6             | 6             | 0           | 2.766844                | -1.548281 | -0.229617 |
| 7             | 6             | 0           | -3.875187               | -0.733261 | 0.093993  |
| 8             | 6             | 0           | -5.051348               | -1.340467 | 0.573841  |
| 9             | 6             | 0           | -5.167086               | -2.717664 | 0.717540  |
| 10            | 6             | 0           | -4.082365               | -3.528599 | 0.386035  |
| 11            | 6             | 0           | -2.905167               | -2.943589 | -0.065607 |
| 12            | 6             | 0           | 2.905179                | -2.943594 | -0.065664 |
| 13            | 6             | 0           | 4.082379                | -3.528602 | 0.385973  |
| 14            | 6             | 0           | 5.167090                | -2.717664 | 0.717507  |
| 15            | 6             | 0           | 5.051340                | -1.340466 | 0.573835  |
| 16            | 6             | 0           | 3.875179                | -0.733262 | 0.093985  |
| 17            | 6             | 0           | -0.727551               | -0.000048 | 0.000048  |
| 18            | 6             | 0           | 0.727552                | -0.000048 | 0.000048  |
| 19            | 6             | 0           | 1.423516                | 1.067947  | 0.662348  |
| 20            | 6             | 0           | 0.700114                | 1.865352  | 1.539993  |
| 21            | 6             | 0           | -0.700127               | 1.865355  | 1.539988  |
| 22            | 6             | 0           | -1.423520               | 1.067947  | 0.662340  |
| 23            | 6             | 0           | 2.766797                | 1.548254  | 0.229682  |
| 24            | 6             | 0           | -2.766798               | 1.548252  | 0.229654  |
| 25            | 6             | 0           | -3.875131               | 0.733299  | -0.094140 |
| 26            | 6             | 0           | -5.051192               | 1.340579  | -0.574134 |
| 27            | 6             | 0           | -5.166865               | 2.717791  | -0.717747 |
| 28            | 6             | 0           | -4.082176               | 3.528665  | -0.385990 |
| 29            | 6             | 0           | -2.905062               | 2.943582  | 0.065777  |
| 30            | 6             | 0           | 2.905075                | 2.943587  | 0.065834  |
| 31            | 6             | 0           | 4.082191                | 3.528668  | -0.385927 |
| 32            | 6             | 0           | 5.166870                | 2.717790  | -0.717714 |
| 33            | 6             | 0           | 5.051185                | 1.340577  | -0.574127 |
| 34            | 6             | 0           | 3.875123                | 0.733300  | -0.094133 |
| 35            | 1             | 0           | -1.222190               | -2.604705 | -2.140130 |
| 36            | 1             | 0           | 1.222173                | -2.604696 | -2.140146 |
| 37            | 1             | 0           | -5.884545               | -0.705413 | 0.858171  |
| 38            | 1             | 0           | -6.087452               | -3.149916 | 1.100621  |
| 39            | 1             | 0           | -4.139673               | -4.607206 | 0.504751  |
| 40            | 1             | 0           | -2.047732               | -3.576874 | -0.266637 |
| 41            | 1             | 0           | 2.047752                | -3.576885 | -0.266712 |
| 42            | 1             | 0           | 4.139698                | -4.607211 | 0.504664  |
| 43            | 1             | 0           | 6.087455                | -3.149916 | 1.100590  |
| 44            | 1             | 0           | 5.884529                | -0.705409 | 0.858182  |
| 45            | 1             | 0           | 1.222167                | 2.604480  | 2.140392  |
| 46            | 1             | 0           | -1.222184               | 2.604488  | 2.140376  |
| 47            | 1             | 0           | -5.884366               | 0.705572  | -0.858637 |
| 48            | 1             | 0           | -6.087153               | 3.150101  | -1.100949 |
| 49            | 1             | 0           | -4.139436               | 4.607285  | -0.504611 |
| 50            | 1             | 0           | -2.047639               | 3.576828  | 0.266978  |
| 51            | 1             | 0           | 2.047660                | 3.576839  | 0.267052  |
| 52            | 1             | 0           | 4.139462                | 4.607290  | -0.504524 |
| 53            | 1             | 0           | 6.087157                | 3.150101  | -1.100917 |
| 54            | 1             | 0           | 5.884351                | 0.705567  | -0.858648 |

  

| Ground to excited state transition velocity dipole moments (Au): |         |         |         |         |        |
|------------------------------------------------------------------|---------|---------|---------|---------|--------|
| state                                                            | X       | Y       | Z       | Dip. S. | Osc.   |
| 1                                                                | 0.2552  | -0.0000 | -0.0000 | 0.0651  | 0.3845 |
| 2                                                                | -0.0001 | 0.0000  | -0.0000 | 0.0000  | 0.0000 |
| 3                                                                | 0.0000  | -0.0589 | -0.0048 | 0.0035  | 0.0170 |
| 4                                                                | 0.0000  | -0.0000 | 0.0000  | 0.0000  | 0.0000 |
| 5                                                                | -0.0000 | 0.0000  | 0.0000  | 0.0000  | 0.0000 |
| 6                                                                | 0.0000  | 0.0534  | -0.0010 | 0.0029  | 0.0132 |
| 7                                                                | 0.0000  | 0.0000  | 0.0000  | 0.0000  | 0.0000 |
| 8                                                                | 0.0415  | 0.0000  | 0.0000  | 0.0017  | 0.0077 |
| 9                                                                | -0.0000 | 0.0194  | -0.0299 | 0.0013  | 0.0053 |
| 10                                                               | 0.0000  | 0.0684  | 0.0371  | 0.0061  | 0.0251 |
| 11                                                               | 0.0000  | -0.0009 | -0.0005 | 0.0000  | 0.0000 |
| 12                                                               | 0.3875  | -0.0000 | -0.0000 | 0.1501  | 0.6135 |
| 13                                                               | 0.0000  | 0.0001  | -0.0000 | 0.0000  | 0.0000 |
| 14                                                               | -0.0000 | -0.1926 | 0.0305  | 0.0380  | 0.1501 |
| 15                                                               | -0.0000 | 0.0003  | -0.0001 | 0.0000  | 0.0000 |
| 16                                                               | 0.0987  | 0.0000  | 0.0000  | 0.0097  | 0.0379 |

  

| Ground to excited state transition magnetic dipole moments (Au): |         |         |         |  |  |
|------------------------------------------------------------------|---------|---------|---------|--|--|
| state                                                            | X       | Y       | Z       |  |  |
| 1                                                                | -0.0000 | 0.0003  | -0.0005 |  |  |
| 2                                                                | 0.0000  | 0.8201  | -2.5150 |  |  |
| 3                                                                | -0.0001 | 0.0000  | 0.0000  |  |  |
| 4                                                                | -0.0000 | 0.4988  | -0.9101 |  |  |
| 5                                                                | 0.1790  | 0.0000  | -0.0000 |  |  |
| 6                                                                | 0.0001  | 0.0001  | -0.0001 |  |  |
| 7                                                                | 0.0000  | -0.5592 | 0.0281  |  |  |
| 8                                                                | 0.0000  | 0.0002  | 0.0002  |  |  |
| 9                                                                | 0.0001  | -0.0000 | -0.0000 |  |  |
| 10                                                               | 0.0005  | -0.0000 | 0.0000  |  |  |
| 11                                                               | 0.0336  | 0.0000  | -0.0000 |  |  |
| 12                                                               | -0.0000 | 0.0000  | 0.0002  |  |  |
| 13                                                               | -0.0239 | -0.0000 | -0.0000 |  |  |
| 14                                                               | -0.0001 | 0.0006  | 0.0028  |  |  |
| 15                                                               | 0.0000  | 0.3779  | 1.7403  |  |  |
| 16                                                               | 0.0000  | -0.0001 | -0.0000 |  |  |

  

| Ground to excited state transition velocity quadrupole moments (Au): |         |         |         |         |         |         |
|----------------------------------------------------------------------|---------|---------|---------|---------|---------|---------|
| state                                                                | XX      | YY      | ZZ      | XY      | XZ      | YZ      |
| 1                                                                    | 0.0000  | 0.0000  | -0.0000 | 0.0001  | -0.0000 | 0.0000  |
| 2                                                                    | 0.0000  | -0.0000 | -0.0000 | 0.2410  | -0.0981 | -0.0000 |
| 3                                                                    | 0.0000  | -0.0000 | 0.0000  | 0.0000  | -0.0000 | -0.0000 |
| 4                                                                    | 0.0000  | -0.0000 | -0.0000 | 0.4533  | -0.1116 | -0.0000 |
| 5                                                                    | -0.0260 | 0.0613  | 0.0826  | 0.0000  | -0.0000 | 0.1426  |
| 6                                                                    | -0.0002 | 0.0000  | 0.0000  | 0.0001  | -0.0000 | 0.0000  |
| 7                                                                    | 0.0000  | -0.0000 | 0.0000  | -1.1470 | 0.1696  | 0.0000  |
| 8                                                                    | -0.0000 | 0.0000  | 0.0000  | 0.0004  | -0.0001 | 0.0000  |
| 9                                                                    | 0.0001  | 0.0001  | -0.0000 | -0.0000 | 0.0000  | -0.0000 |
| 10                                                                   | -0.0044 | -0.0020 | 0.0005  | -0.0000 | 0.0000  | 0.0000  |
| 0.0011                                                               |         |         |         |         |         |         |
| 11                                                                   | -0.3039 | -0.1474 | 0.0351  | -0.0000 | -0.0000 | -0.0000 |
| 0.0788                                                               |         |         |         |         |         |         |
| 12                                                                   | 0.0000  | 0.0000  | -0.0000 | -0.0000 | -0.0001 | -0.0000 |
| 0.0000                                                               |         |         |         |         |         |         |
| 13                                                                   | -0.4875 | -0.4323 | 0.1824  | -0.0000 | 0.0000  | 0.0000  |
| 0.2409                                                               |         |         |         |         |         |         |
| 14                                                                   | -0.0000 | -0.0002 | 0.0001  | 0.0028  | -0.0004 | -0.0004 |
| 0.0001                                                               |         |         |         |         |         |         |
| 15                                                                   | 0.0000  | -0.0000 | 0.0000  | 1.7649  | -0.2461 | -       |
| 0.0000                                                               |         |         |         |         |         |         |
| 1                                                                    | -2.2537 | 0.0000  | 0.0000  | 5.0794  | 0.3824  |         |

  

SCF Done: E(RB3LYP) = -1307.68258132 A.U. after 1 cycles

imaginary vibration = 0

Zero-point correction= 0.425057 (Hartree/Particle)

Thermal correction to Energy= 0.447284

Thermal correction to Enthalpy= 0.448228

Thermal correction to Gibbs Free Energy= 0.375923

Sum of electronic and zero-point Energies= -1307.581424

Sum of electronic and thermal Energies= -1307.559198

Sum of electronic and thermal Enthalpies= -1307.558253

Sum of electronic and thermal Free Energies= -1307.630558

|    |        |        |         |         |        |           |         |  |  |
|----|--------|--------|---------|---------|--------|-----------|---------|--|--|
| 16 | 0.0000 | 0.0000 | -0.0000 | -0.0001 | 0.0000 | 112 ->116 | 0.31540 |  |  |
|----|--------|--------|---------|---------|--------|-----------|---------|--|--|

0.0000  
 $\langle 0 | \text{del} | b \rangle * \langle b | \text{rxdel} | 0 \rangle + \langle 0 | \text{del} | b \rangle * \langle b | \text{delr} + \text{rdel} | 0 \rangle$

|                                                                       |         |         |         |             |           |                           |          |           |           |           |          |
|-----------------------------------------------------------------------|---------|---------|---------|-------------|-----------|---------------------------|----------|-----------|-----------|-----------|----------|
| Rotatory Strengths (R) in cgs (10 <sup>**</sup> -40 erg-esu-cm/Gauss) |         |         |         |             |           | Excited State             | 5:       | Singlet-A | 3.8806 eV | 319.50 nm | f=0.0000 |
| state                                                                 | XX      | YY      | ZZ      | R(velocity) | E-M Angle | <S <sup>**</sup> 2>=0.000 |          |           |           |           |          |
| 1                                                                     | 0.0000  | 0.0002  | -0.0032 | -0.0010     | 90.00     | 110 ->115                 | 0.10163  |           |           |           |          |
| 2                                                                     | 0.0031  | 0.0018  | 0.0012  | 0.0021      | 90.00     | 111 ->113                 | 0.69329  |           |           |           |          |
| 3                                                                     | -0.0043 | -0.0000 | -0.0019 | -0.0021     | 90.00     | Excited State             | 6:       | Singlet-A | 3.9119 eV | 316.94 nm | f=0.0136 |
| 4                                                                     | -0.0061 | -0.0008 | -0.0037 | -0.0036     | 90.00     | <S <sup>**</sup> 2>=0.000 |          |           |           |           |          |
| 5                                                                     | 0.0000  | -0.0008 | -0.0001 | -0.0003     | 90.00     | 106 ->113                 | 0.10269  |           |           |           |          |
| 6                                                                     | 0.0101  | 0.0005  | 0.0067  | 0.0057      | 90.00     | 108 ->113                 | 0.47694  |           |           |           |          |
| 7                                                                     | -0.0058 | 0.0025  | -0.0018 | -0.0017     | 90.00     | 112 ->115                 | -0.13613 |           |           |           |          |
| 8                                                                     | 0.0000  | 0.0017  | 0.0002  | 0.0006      | 90.00     | 112 ->117                 | -0.45726 |           |           |           |          |
| 9                                                                     | 0.0033  | -0.0003 | -0.0008 | 0.0007      | 90.00     | 112 ->119                 | 0.16298  |           |           |           |          |
| 10                                                                    | -0.0014 | 0.0003  | -0.0008 | -0.0007     | 90.00     | Excited State             | 7:       | Singlet-A | 3.9836 eV | 311.24 nm | f=0.0000 |
| 11                                                                    | -0.0000 | 0.0007  | -0.0003 | 0.0001      | 90.00     | <S <sup>**</sup> 2>=0.000 |          |           |           |           |          |
| 12                                                                    | -0.0000 | 0.0020  | -0.0103 | -0.0028     | 90.00     |                           |          |           |           |           |          |
| 13                                                                    | -0.0000 | 0.0037  | -0.0045 | -0.0003     | 90.00     | 109 ->114                 | 0.17871  |           |           |           |          |
| 14                                                                    | -0.0600 | -0.0028 | -0.0888 | -0.0505     | 90.00     | 110 ->113                 | -0.29595 |           |           |           |          |
| 15                                                                    | 0.0392  | 0.0026  | 0.0862  | 0.0427      | 90.00     | 112 ->116                 | 0.60635  |           |           |           |          |
| 16                                                                    | -0.0000 | 0.0012  | 0.0005  | 0.0006      | 90.00     |                           |          |           |           |           |          |

$1/2[\langle 0 | \text{r} | b \rangle * \langle b | \text{rxdel} | 0 \rangle + (\langle 0 | \text{rxdel} | b \rangle * \langle b | \text{r} | 0 \rangle)^*]$

|                                                                       |         |         |         |           |  |                           |          |           |           |           |          |
|-----------------------------------------------------------------------|---------|---------|---------|-----------|--|---------------------------|----------|-----------|-----------|-----------|----------|
| Rotatory Strengths (R) in cgs (10 <sup>**</sup> -40 erg-esu-cm/Gauss) |         |         |         |           |  | Excited State             | 8:       | Singlet-A | 4.0360 eV | 307.20 nm | f=0.0086 |
| state                                                                 | XX      | YY      | ZZ      | R(length) |  | <S <sup>**</sup> 2>=0.000 |          |           |           |           |          |
| 1                                                                     | -0.0029 | -0.0000 | 0.0000  | -0.0010   |  | 109 ->113                 | 0.69325  |           |           |           |          |
| 2                                                                     | -0.0000 | 0.0026  | 0.0033  | 0.0020    |  | Excited State             | 9:       | Singlet-A | 4.3064 eV | 287.90 nm | f=0.0053 |
| 3                                                                     | -0.0000 | -0.0059 | -0.0002 | -0.0020   |  | <S <sup>**</sup> 2>=0.000 |          |           |           |           |          |
| 4                                                                     | -0.0000 | -0.0101 | 0.0007  | -0.0031   |  | 106 ->113                 | 0.19470  |           |           |           |          |
| 5                                                                     | -0.0006 | 0.0000  | -0.0000 | -0.0002   |  | 108 ->113                 | -0.21494 |           |           |           |          |
| 6                                                                     | -0.0000 | 0.0170  | 0.0002  | 0.0057    |  | 111 ->114                 | 0.54009  |           |           |           |          |
| 7                                                                     | -0.0000 | -0.0057 | 0.0001  | -0.0019   |  | 112 ->117                 | -0.12332 |           |           |           |          |
| 8                                                                     | 0.0020  | 0.0000  | -0.0000 | 0.0007    |  | 112 ->119                 | 0.29189  |           |           |           |          |
| 9                                                                     | -0.0000 | -0.0029 | 0.0051  | 0.0007    |  |                           |          |           |           |           |          |
| 10                                                                    | 0.0000  | -0.0024 | 0.0004  | -0.0007   |  | Excited State             | 10:      | Singlet-A | 4.3852 eV | 282.73 nm | f=0.0247 |
| 11                                                                    | 0.0004  | -0.0000 | 0.0000  | 0.0001    |  | <S <sup>**</sup> 2>=0.000 |          |           |           |           |          |
| 12                                                                    | -0.0083 | -0.0000 | -0.0000 | -0.0028   |  | 106 ->113                 | -0.33093 |           |           |           |          |
| 13                                                                    | -0.0008 | -0.0000 | 0.0000  | -0.0003   |  | 108 ->113                 | 0.26071  |           |           |           |          |
| 14                                                                    | 0.0000  | -0.4981 | 0.3238  | -0.0581   |  | 112 ->117                 | 0.35109  |           |           |           |          |
| 15                                                                    | -0.0000 | 0.4881  | -0.3351 | 0.0510    |  | 112 ->119                 | 0.40920  |           |           |           |          |
| 16                                                                    | 0.0018  | -0.0000 | -0.0000 | 0.0006    |  |                           |          |           |           |           |          |

$1/2[\langle 0 | \text{del} | b \rangle * \langle b | \text{r} | 0 \rangle + (\langle 0 | \text{r} | b \rangle * \langle b | \text{del} | 0 \rangle)^*]$  (Au)

|       |         |         |         |         |              |                           |          |           |           |           |          |
|-------|---------|---------|---------|---------|--------------|---------------------------|----------|-----------|-----------|-----------|----------|
| state | X       | Y       | Z       | Dip. S. | Osc. (frdel) | Excited State             | 11:      | Singlet-A | 4.3866 eV | 282.64 nm | f=0.0000 |
| 1     | -0.5752 | -0.0000 | -0.0000 | 0.5752  | 0.3834       | <S <sup>**</sup> 2>=0.000 |          |           |           |           |          |
| 2     | -0.0000 | -0.0000 | -0.0000 | 0.0000  | 0.0000       | 106 ->114                 | -0.10479 |           |           |           |          |
| 3     | -0.0000 | -0.0245 | -0.0002 | 0.0248  | 0.0165       | 107 ->113                 | -0.26921 |           |           |           |          |
| 4     | -0.0000 | -0.0000 | 0.0000  | 0.0000  | 0.0000       | 110 ->115                 | 0.12596  |           |           |           |          |
| 5     | -0.0000 | -0.0000 | -0.0000 | 0.0000  | 0.0000       | 112 ->118                 | 0.61992  |           |           |           |          |
| 6     | 0.0000  | -0.0201 | -0.0000 | 0.0201  | 0.0134       | Excited State             | 12:      | Singlet-A | 4.4387 eV | 279.33 nm | f=0.6109 |
| 7     | 0.0000  | -0.0000 | -0.0000 | 0.0000  | 0.0000       | <S <sup>**</sup> 2>=0.000 |          |           |           |           |          |
| 8     | -0.0122 | -0.0000 | 0.0000  | 0.0122  | 0.0082       | 110 ->114                 | 0.67913  |           |           |           |          |
| 9     | -0.0000 | -0.0024 | -0.0057 | 0.0080  | 0.0053       |                           |          |           |           |           |          |
| 10    | -0.0000 | -0.0291 | -0.0083 | 0.0373  | 0.0249       | Excited State             | 13:      | Singlet-A | 4.5597 eV | 271.92 nm | f=0.0000 |
| 11    | -0.0000 | -0.0000 | -0.0000 | 0.0000  | 0.0000       | <S <sup>**</sup> 2>=0.000 |          |           |           |           |          |
| 12    | -0.9183 | -0.0000 | -0.0000 | 0.9183  | 0.6122       | 107 ->113                 | 0.59137  |           |           |           |          |
| 13    | -0.0000 | -0.0000 | -0.0000 | 0.0000  | 0.0000       | 108 ->114                 | 0.23712  |           |           |           |          |
| 14    | -0.0000 | -0.2170 | -0.0051 | 0.2221  | 0.1481       | 110 ->115                 | 0.20105  |           |           |           |          |
| 15    | -0.0000 | -0.0000 | -0.0000 | 0.0000  | 0.0000       | 110 ->117                 | -0.10319 |           |           |           |          |
| 16    | -0.0581 | -0.0000 | -0.0000 | 0.0581  | 0.0387       | 112 ->118                 | 0.17900  |           |           |           |          |

Excitation energies and oscillator strengths:

|                                                                                   |         |           |           |           |          |                           |          |           |           |           |          |
|-----------------------------------------------------------------------------------|---------|-----------|-----------|-----------|----------|---------------------------|----------|-----------|-----------|-----------|----------|
| Excited State                                                                     | 1:      | Singlet-A | 3.0726 eV | 403.52 nm | f=0.3824 | Excited State             | 14:      | Singlet-A | 4.5952 eV | 269.81 nm | f=0.1461 |
| <S <sup>**</sup> 2>=0.000                                                         |         |           |           |           |          | <S <sup>**</sup> 2>=0.000 |          |           |           |           |          |
| 112 ->113                                                                         | 0.69792 |           |           |           |          | 106 ->113                 | 0.40396  |           |           |           |          |
| This state for optimization and/or second-order correction.                       |         |           |           |           |          | 108 ->113                 | -0.10481 |           |           |           |          |
| Total Energy, E(TD-HF/TD-DFT) = -1307.89356544                                    |         |           |           |           |          | 111 ->114                 | -0.36539 |           |           |           |          |
| Copying the excited state density for this state as the 1-particle RhoCI density. |         |           |           |           |          | 111 ->116                 | 0.11762  |           |           |           |          |
|                                                                                   |         |           |           |           |          | 112 ->117                 | 0.11886  |           |           |           |          |
|                                                                                   |         |           |           |           |          | 112 ->119                 | 0.38189  |           |           |           |          |

|                           |         |           |           |           |          |                           |          |           |           |           |          |
|---------------------------|---------|-----------|-----------|-----------|----------|---------------------------|----------|-----------|-----------|-----------|----------|
| Excited State             | 2:      | Singlet-A | 3.2635 eV | 379.91 nm | f=0.0000 | Excited State             | 15:      | Singlet-A | 4.5992 eV | 269.58 nm | f=0.0000 |
| <S <sup>**</sup> 2>=0.000 |         |           |           |           |          | <S <sup>**</sup> 2>=0.000 |          |           |           |           |          |
| 112 ->114                 | 0.70386 |           |           |           |          | 107 ->115                 | -0.11372 |           |           |           |          |
| Excited State             | 3:      | Singlet-A | 3.7152 eV | 333.72 nm | f=0.0160 | 109 ->114                 | 0.63719  |           |           |           |          |
| <S <sup>**</sup> 2>=0.000 |         |           |           |           |          | 109 ->116                 | -0.11521 |           |           |           |          |
| 108 ->113                 | 0.19191 |           |           |           |          | 111 ->115                 | -0.10986 |           |           |           |          |
| 112 ->115                 | 0.67428 |           |           |           |          | 112 ->116                 | -0.15326 |           |           |           |          |
| Excited State             | 4:      | Singlet-A | 3.8451 eV | 322.45 nm | f=0.0000 | Excited State             | 16:      | Singlet-A | 4.6662 eV | 265.71 nm | f=0.0396 |
| <S <sup>**</sup> 2>=0.000 |         |           |           |           |          | <S <sup>**</sup> 2>=0.000 |          |           |           |           |          |
| 110 ->113                 | 0.62599 |           |           |           |          | 105 ->113                 | -0.13924 |           |           |           |          |
|                           |         |           |           |           |          | 110 ->116                 | -0.12212 |           |           |           |          |
|                           |         |           |           |           |          | 112 ->120                 | 0.65320  |           |           |           |          |

**Table S8.** Molecular geometries, excitations, and thermodynamic parameters of the optimized structure of (*P,P*)-twisted-**Ant7** in the global minimum state ( $S_0$ ) calculated at the B3LYP/6-31G(d). Frequency vibrational and TD-DFT calculations were performed at B3LYP/6-311G(2d,p).

| -----  |        |        |                         |           |           | Ground to excited state transition electric dipole moments (Au):     |         |         |         |         |         |         |
|--------|--------|--------|-------------------------|-----------|-----------|----------------------------------------------------------------------|---------|---------|---------|---------|---------|---------|
| Center | Atomic | Atomic | Coordinates (Angstroms) |           |           | state                                                                | X       | Y       | Z       | Dip. S. | Osc.    |         |
| Number | Number | Type   | X                       | Y         | Z         | 1                                                                    | 2       | 3       | 4       | 5       | 6       |         |
| 1      | 6      | 0      | 1.393543                | -1.652482 | -0.305029 | 1                                                                    | 1.8900  | -0.0000 | 0.1111  | 3.5844  | 0.2063  |         |
| 2      | 6      | 0      | 0.674689                | -2.824451 | -0.212744 | 2                                                                    | 0.1800  | 0.0000  | 0.1813  | 0.0653  | 0.0048  |         |
| 3      | 6      | 0      | -0.674672               | -2.824390 | 0.213559  | 3                                                                    | -0.2247 | 0.0003  | 0.5074  | 0.3080  | 0.0247  |         |
| 4      | 6      | 0      | -1.393532               | -1.652398 | 0.305495  | 4                                                                    | 0.0002  | 0.2588  | -0.0004 | 0.0670  | 0.0054  |         |
| 5      | 6      | 0      | 2.700034                | -1.646872 | -1.019883 | 5                                                                    | 0.0000  | 0.2948  | 0.0000  | 0.0869  | 0.0074  |         |
| 6      | 6      | 0      | -2.700015               | -1.646582 | 1.020362  | 6                                                                    | 0.0000  | -0.1943 | -0.0000 | 0.0377  | 0.0033  |         |
| 7      | 6      | 0      | 3.809200                | -0.846385 | -0.665879 | 7                                                                    | 0.0255  | 0.0000  | -0.0833 | 0.0076  | 0.0007  |         |
| 8      | 6      | 0      | 4.961663                | -0.880389 | -1.469864 | 8                                                                    | -0.1521 | 0.0001  | -0.5602 | 0.3370  | 0.0306  |         |
| 9      | 6      | 0      | 5.047024                | -1.691903 | -2.596215 | 9                                                                    | -0.5279 | 0.0001  | 0.1777  | 0.3103  | 0.0292  |         |
| 10     | 6      | 0      | 3.960016                | -2.494272 | -2.942274 | 10                                                                   | -0.0001 | -1.1542 | 0.0001  | 1.3322  | 0.1287  |         |
| 11     | 6      | 0      | 2.805388                | -2.458134 | -2.167198 | 11                                                                   | -0.0001 | 0.3394  | -0.0001 | 0.1152  | 0.0115  |         |
| 12     | 6      | 0      | -2.805349               | -2.457498 | 2.167923  | 12                                                                   | 0.0000  | -0.3544 | 0.0000  | 0.1256  | 0.0127  |         |
| 13     | 6      | 0      | -3.959966               | -2.493407 | 2.943025  | 13                                                                   | 0.2659  | 0.0007  | -0.0613 | 0.0745  | 0.0076  |         |
| 14     | 6      | 0      | -5.046981               | -1.691145 | 2.596740  | 14                                                                   | -0.0004 | 0.8295  | -0.0001 | 0.6880  | 0.0709  |         |
| 15     | 6      | 0      | -4.961640               | -0.879969 | 1.470145  | 15                                                                   | 0.0062  | -1.3862 | 0.0011  | 1.9215  | 0.2016  |         |
| 16     | 6      | 0      | -3.809188               | -0.846202 | 0.666133  | 16                                                                   | 2.0756  | 0.0043  | 0.3153  | 4.4077  | 0.4629  |         |
| 17     | 6      | 0      | 0.718644                | -0.404118 | 0.009146  | Ground to excited state transition velocity dipole moments (Au):     |         |         |         |         |         |         |
| 18     | 6      | 0      | -0.718641               | -0.404126 | -0.009060 | state                                                                | X       | Y       | Z       | Dip. S. | Osc.    |         |
| 19     | 6      | 0      | -1.402580               | 0.803454  | -0.294329 | 1                                                                    | -0.1648 | 0.0000  | -0.0093 | 0.0272  | 0.2104  |         |
| 20     | 6      | 0      | -0.700199               | 2.033012  | -0.178404 | 2                                                                    | -0.0207 | -0.0000 | -0.0199 | 0.0008  | 0.0050  |         |
| 21     | 6      | 0      | 0.700176                | 2.033070  | 0.177798  | 3                                                                    | 0.0270  | -0.0000 | -0.0614 | 0.0045  | 0.0249  |         |
| 22     | 6      | 0      | 1.402574                | 0.803550  | 0.294065  | 4                                                                    | -0.0000 | -0.0326 | 0.0000  | 0.0011  | 0.0059  |         |
| 23     | 6      | 0      | -2.724449               | 0.745213  | -0.986510 | 5                                                                    | -0.0000 | -0.0369 | -0.0000 | 0.0014  | 0.0071  |         |
| 24     | 6      | 0      | 2.724435                | 0.745508  | 0.986283  | 6                                                                    | -0.0000 | 0.0257  | 0.0000  | 0.0007  | 0.0034  |         |
| 25     | 6      | 0      | 3.824267                | -0.039681 | 0.574727  | 7                                                                    | -0.0022 | -0.0000 | 0.0111  | 0.0001  | 0.0006  |         |
| 26     | 6      | 0      | 4.985180                | -0.062713 | 1.369445  | 8                                                                    | 0.0225  | -0.0000 | 0.0806  | 0.0070  | 0.0343  |         |
| 27     | 6      | 0      | 5.080189                | 0.656560  | 2.554928  | 9                                                                    | 0.0739  | -0.0000 | -0.0248 | 0.0061  | 0.0287  |         |
| 28     | 6      | 0      | 3.988088                | 1.413265  | 2.979654  | 10                                                                   | 0.0000  | 0.1691  | -0.0000 | 0.0286  | 0.1315  |         |
| 29     | 6      | 0      | 2.832501                | 1.444891  | 2.207293  | 11                                                                   | 0.0000  | -0.0513 | 0.0000  | 0.0026  | 0.0117  |         |
| 30     | 6      | 0      | -2.832522               | 1.444213  | -2.207738 | 12                                                                   | 0.0000  | 0.0546  | -0.0000 | 0.0030  | 0.0130  |         |
| 31     | 6      | 0      | -3.988110               | 1.412343  | -2.980086 | 13                                                                   | -0.0435 | -0.0001 | 0.0097  | 0.0020  | 0.0086  |         |
| 32     | 6      | 0      | -5.080203               | 0.655756  | -2.555127 | 14                                                                   | 0.0001  | -0.1280 | 0.0000  | 0.0164  | 0.0707  |         |
| 33     | 6      | 0      | -4.985184               | -0.063155 | -1.369425 | 15                                                                   | -0.0010 | 0.2196  | -0.0002 | 0.0482  | 0.2044  |         |
| 34     | 6      | 0      | -3.824273               | -0.039864 | -0.574712 | 16                                                                   | -0.3273 | -0.0007 | -0.0502 | 0.1097  | 0.4642  |         |
| 35     | 6      | 0      | -1.363679               | 3.297043  | -0.305152 | Ground to excited state transition magnetic dipole moments (Au):     |         |         |         |         |         |         |
| 36     | 6      | 0      | -0.696169               | 4.481836  | -0.140034 | state                                                                | X       | Y       | Z       |         |         |         |
| 37     | 6      | 0      | 0.696100                | 4.481887  | 0.138757  | 1                                                                    | -0.3505 | -0.0001 | 0.0869  |         |         |         |
| 38     | 6      | 0      | 1.363631                | 3.297151  | 0.304202  | 2                                                                    | 0.0283  | 0.0002  | 1.8512  |         |         |         |
| 39     | 1      | 0      | 1.155183                | -3.768389 | -0.452047 | 3                                                                    | 0.0687  | 0.0005  | 1.2695  |         |         |         |
| 40     | 1      | 0      | -1.155160               | -3.768258 | 0.453150  | 4                                                                    | -0.0001 | 0.4646  | -0.0008 |         |         |         |
| 41     | 1      | 0      | 5.799419                | -0.242132 | -1.204532 | 5                                                                    | 0.0000  | 1.0123  | -0.0002 |         |         |         |
| 42     | 1      | 0      | 5.948045                | -1.687485 | -3.203489 | 6                                                                    | 0.0000  | -0.2522 | 0.0000  |         |         |         |
| 43     | 1      | 0      | 3.998597                | -3.126779 | -3.825019 | 7                                                                    | 0.0652  | -0.0001 | -0.4836 |         |         |         |
| 44     | 1      | 0      | 1.944331                | -3.045202 | -2.470248 | 8                                                                    | -0.2691 | 0.0000  | 0.1678  |         |         |         |
| 45     | 1      | 0      | -1.944285               | -3.044471 | 2.471138  | 9                                                                    | -0.1341 | -0.0000 | 0.7233  |         |         |         |
| 46     | 1      | 0      | -3.998532               | -3.125648 | 3.825961  | 10                                                                   | 0.0000  | 0.4362  | -0.0001 |         |         |         |
| 47     | 1      | 0      | -5.947993               | -1.686547 | 3.204027  | 11                                                                   | 0.0000  | -0.0475 | 0.0000  |         |         |         |
| 48     | 1      | 0      | -5.799400               | -0.241791 | 1.204637  | 12                                                                   | 0.0001  | -0.1766 | -0.0000 |         |         |         |
| 49     | 1      | 0      | 5.815968                | -0.687144 | 1.054772  | 13                                                                   | -0.0986 | -0.0006 | -0.6961 |         |         |         |
| 50     | 1      | 0      | 5.987641                | 0.608355  | 3.150590  | 14                                                                   | 0.0000  | -0.4304 | 0.0009  |         |         |         |
| 51     | 1      | 0      | 4.025563                | 1.962484  | 3.916547  | 15                                                                   | -0.0004 | 0.9135  | -0.0045 |         |         |         |
| 52     | 1      | 0      | 1.976716                | 2.018954  | 2.559302  | 16                                                                   | -0.1515 | -0.0030 | -1.4263 |         |         |         |
| 53     | 1      | 0      | -1.976737               | 2.010167  | -2.559930 | Ground to excited state transition velocity quadrupole moments (Au): |         |         |         |         |         |         |
| 54     | 1      | 0      | -4.025588               | 1.961271  | -3.917149 | state                                                                | XX      | YY      | ZZ      | XY      | XZ      | YZ      |
| 55     | 1      | 0      | -5.987653               | 0.607356  | -3.150775 | 1                                                                    | -0.0000 | -0.0001 | 0.0001  | 0.0741  | -0.0000 | -0.2397 |
| 56     | 1      | 0      | -5.815960               | -0.687506 | -1.054566 | 2                                                                    | -0.0000 | 0.0000  | 0.0000  | -0.0786 | 0.0000  | -0.0105 |
| 57     | 1      | 0      | -2.428613               | 3.306148  | -0.504818 | 3                                                                    | 0.0001  | -0.0000 | -0.0000 | -0.3620 | 0.0001  | 0.0916  |
| 58     | 1      | 0      | -1.232552               | 5.423254  | -0.223063 | 4                                                                    | 0.1718  | -0.1318 | 0.0596  | 0.0003  | 0.0781  | -0.0000 |
| 59     | 1      | 0      | 1.232464                | 5.423338  | 0.221528  | 5                                                                    | 0.0479  | 0.0545  | 0.0172  | -0.0001 | -0.2338 | -0.0000 |
| 60     | 1      | 0      | 2.428562                | 3.306329  | 0.503867  | 6                                                                    | -0.6371 | 0.2960  | -0.0691 | 0.0000  | 0.1078  | -0.0001 |
|        |        |        |                         |           |           | 7                                                                    | 0.0001  | -0.0001 | 0.0000  | 0.0359  | -0.0000 | -0.1112 |
|        |        |        |                         |           |           | 8                                                                    | 0.0001  | -0.0001 | 0.0000  | 0.3433  | -0.0001 | -0.0271 |
|        |        |        |                         |           |           | 9                                                                    | 0.0001  | 0.0000  | -0.0000 | -0.3492 | 0.0001  | 0.2000  |
|        |        |        |                         |           |           | 10                                                                   | -0.2908 | 0.4559  | -0.1418 | 0.0000  | 0.2754  | -       |
|        |        |        |                         |           |           | 11                                                                   | -0.2433 | -0.0403 | -0.1254 | -0.0001 | -0.2417 | -       |
|        |        |        |                         |           |           | 12                                                                   | -0.5654 | 0.4572  | -0.2812 | -0.0001 | -0.5425 | -       |
|        |        |        |                         |           |           | 13                                                                   | 0.0008  | -0.0007 | 0.0004  | -0.0724 | -0.0002 | -       |
|        |        |        |                         |           |           | 14                                                                   | 1.0684  | -0.8202 | 0.4882  | 0.0000  | -0.1414 | -       |
|        |        |        |                         |           |           | 15                                                                   | -0.3144 | 0.8509  | -0.0491 | 0.0005  | -0.3528 | -       |
|        |        |        |                         |           |           | 16                                                                   | 0.0015  |         |         |         |         | -       |

  

|                                              |              |                    |                     |
|----------------------------------------------|--------------|--------------------|---------------------|
| -----                                        |              |                    |                     |
| SCF Done:                                    | E(RB3LYP) =  | -1461.31519674     | A.U. after 6 cycles |
| imaginary vibration =                        | 0            |                    |                     |
| Zero-point correction=                       | 0.471126     | (Hartree/Particle) |                     |
| Thermal correction to Energy=                | 0.496134     |                    |                     |
| Thermal correction to Enthalpy=              | 0.497078     |                    |                     |
| Thermal correction to Gibbs Free Energy=     | 0.419327     |                    |                     |
| Sum of electronic and zero-point Energies=   | -1461.205208 |                    |                     |
| Sum of electronic and thermal Energies=      | -1461.180200 |                    |                     |
| Sum of electronic and thermal Enthalpies=    | -1461.179256 |                    |                     |
| Sum of electronic and thermal Free Energies= | -1461.257007 |                    |                     |

16 0.0010 -0.0028 0.0004 0.1822 0.0011 -

0.4953

$\langle 0 | \text{del} | b \rangle * \langle b | \text{rxdel} | 0 \rangle + \langle 0 | \text{del} | b \rangle * \langle b | \text{delr+rdel} | 0 \rangle$  Excited State 5: Singlet-A 3.4956 eV 354.69 nm f=0.0074  
 $\langle S^{*2} \rangle = 0.000$

Rotatory Strengths (R) in cgs ( $10^{**40}$  erg-esu-cm/Gauss) 0.18389  
state XX YY ZZ R(velocity) E-M Angle 125 -> 126 0.39293  
125 -> 129 0.53908

1 -6.1261 397.9067 74.7315 155.5040 17.15  
2 -112.5180 -123.6709 -2.5634 -79.5841 134.74  
3 -163.6809 -281.5467 -1.8143 -149.0140 153.15  
4 -36.9904 -0.0001 -51.9362 -29.6422 90.00  
5 -126.6696 0.0000 -79.1337 -68.6011 90.00  
6 -25.2939 0.0000 -10.1444 -11.8128 90.00  
7 -13.1695 -15.0138 -1.0308 -9.7380 176.45  
8 106.9482 -54.0108 -14.1233 12.9380 73.64  
9 -23.2772 -54.5333 -61.9272 -46.5792 119.06  
10 66.3405 0.0000 293.4760 119.9388 90.00  
11 -23.5012 0.0000 34.9851 3.8280 90.00  
12 46.3662 -0.0000 -91.1258 -14.9199 90.00  
13 -17.1408 -3.6279 9.4126 -3.7854 94.52  
14 84.6650 0.0001 167.5193 84.0615 0.12  
15 624.9530 0.0061 276.7618 300.5736 0.33  
16 140.1160 656.4539 -252.6352 181.3116 75.22

$1/2[\langle 0 | r | b \rangle * \langle b | \text{rxdel} | 0 \rangle + (\langle 0 | \text{rxdel} | b \rangle * \langle b | r | 0 \rangle)^*]$  Excited State 6: Singlet-A 3.5237 eV 351.86 nm f=0.0033  
 $\langle S^{*2} \rangle = 0.000$

Rotatory Strengths (R) in cgs ( $10^{**40}$  erg-esu-cm/Gauss) 0.69446  
state XX YY ZZ R(length) 123 -> 126

1 468.4023 -0.0000 -6.8254 153.8590  
2 -3.5980 -0.0000 -237.3504 -80.3162  
3 10.9238 -0.0001 -455.5453 -148.2072  
4 0.0000 -85.0166 -0.0002 -28.3389  
5 -0.0000 -211.0145 0.0000 -70.3382  
6 -0.0000 -34.6520 0.0000 -11.5507  
7 -1.1763 0.0000 -28.4975 -9.8913  
8 -28.9475 -0.0000 66.4674 12.5066  
9 -50.0620 0.0000 -90.8910 -46.9843  
10 0.0000 356.0629 0.0000 118.6876  
11 0.0000 11.3902 0.0000 3.7967  
12 -0.0000 -44.2602 0.0000 -14.7534  
13 18.5324 0.0003 -30.1790 -3.8821  
14 0.0000 252.4520 0.0000 84.1507  
15 0.0016 895.4892 0.0035 298.4981  
16 222.3880 0.0090 318.0769 180.1580

$1/2[\langle 0 | \text{del} | b \rangle * \langle b | r | 0 \rangle + (\langle 0 | r | b \rangle * \langle \text{del} | 0 \rangle)^*]$  (Au) Excited State 7: Singlet-A 3.6348 eV 341.10 nm f=0.0007  
 $\langle S^{*2} \rangle = 0.000$

state X Y Z Dip. S. Osc.(frdel) 122 -> 126 0.69448  
125 -> 130 -0.10555  
125 -> 131 0.16691

1 -0.3115 -0.0000 -0.0010 0.3125 0.2083  
2 -0.0037 -0.0000 -0.0036 0.0073 0.0049  
3 -0.0061 -0.0000 -0.0312 0.0372 0.0248  
4 -0.0000 -0.0084 -0.0000 0.0084 0.0056  
5 -0.0000 -0.0109 -0.0000 0.0109 0.0073  
6 -0.0000 -0.0050 -0.0000 0.0050 0.0033  
7 -0.0001 -0.0000 -0.0009 0.0010 0.0007  
8 -0.0034 -0.0000 -0.0452 0.0486 0.0324  
9 -0.0390 -0.0000 -0.0044 0.0434 0.0289  
10 -0.0000 -0.1952 -0.0000 0.1952 0.1301  
11 -0.0000 -0.0174 -0.0000 0.0174 0.0116  
12 0.0000 -0.0193 -0.0000 0.0193 0.0129  
13 -0.0116 -0.0000 -0.0006 0.0122 0.0081  
14 -0.0000 -0.1062 -0.0000 0.1062 0.0708  
15 -0.0000 -0.3044 -0.0000 0.3044 0.2030  
16 -0.6795 -0.0000 -0.0158 0.6953 0.4635

Excitation energies and oscillator strengths:  
119 -> 126 0.39362  
120 -> 126 0.26107  
121 -> 126 0.11785  
123 -> 127 0.13271  
124 -> 128 -0.10314  
125 -> 132 -0.28566  
125 -> 133 0.36455

Excited State 1: Singlet-A 2.3490 eV 527.82 nm f=0.2063  
 $\langle S^{*2} \rangle = 0.000$   
125 -> 126 0.70370  
This state for optimization and/or second-order correction.  
Total Energy, E(TD-HF/TD-DFT) = -1461.59001047  
Copying the excited state density for this state as the 1-particle RhoCI density.

Excited State 15: Singlet-A 4.2818 eV 289.56 nm f=0.2016  
 $\langle S^{*2} \rangle = 0.000$   
119 -> 126 0.39103  
120 -> 126 -0.31714  
121 -> 126 -0.28691  
123 -> 127 -0.18399  
125 -> 128 -0.14749  
125 -> 129 0.21767  
125 -> 132 -0.13193  
125 -> 133 -0.11331

Excited State 2: Singlet-A 3.0103 eV 411.87 nm f=0.0048  
 $\langle S^{*2} \rangle = 0.000$   
125 -> 127 0.69888

Excited State 3: Singlet-A 3.2764 eV 378.42 nm f=0.0247  
 $\langle S^{*2} \rangle = 0.000$   
124 -> 126 0.69162

Excited State 4: Singlet-A 3.2821 eV 377.75 nm f=0.0054  
 $\langle S^{*2} \rangle = 0.000$   
121 -> 126 -0.40299  
125 -> 128 0.52013  
125 -> 129 -0.23986

Excited State 16: Singlet-A 4.2863 eV 289.25 nm f=0.4629  
 $\langle S^{*2} \rangle = 0.000$   
118 -> 126 -0.30512  
124 -> 127 0.61642

**Table S9.** Molecular geometries, excitations, and thermodynamic parameters of the optimized structure of saddle-**Ant7** in a local minimum state ( $S_0$ ) calculated at the B3LYP/6-31G(d) level of theory. Frequency vibrational and TD-DFT calculations were performed at B3LYP/6-311G(2d,p).

| -----  |         |         |                         |          |           | Ground to excited state transition electric dipole moments (Au):     |         |         |         |         |        |
|--------|---------|---------|-------------------------|----------|-----------|----------------------------------------------------------------------|---------|---------|---------|---------|--------|
| Center | Atomic  | Atomic  | Coordinates (Angstroms) |          |           | state                                                                | X       | Y       | Z       | Dip. S. | Osc.   |
| Number | Number  | Type    | X                       | Y        | Z         |                                                                      |         |         |         |         |        |
| -----  |         |         |                         |          |           | -----                                                                |         |         |         |         |        |
| 1      | 6       | 0       | -1.427136               | 1.575426 | -0.609662 | 1                                                                    | -2.1135 | -0.0000 | 0.0000  | 4.4668  | 0.2679 |
| 2      | 6       | 0       | -0.703858               | 2.539796 | -1.286883 | 2                                                                    | -0.1354 | 0.0000  | 0.0000  | 0.0183  | 0.0013 |
| 3      | 6       | 0       | 0.703858                | 2.539796 | -1.286883 | 3                                                                    | -0.2076 | -0.0000 | -0.0000 | 0.0431  | 0.0035 |
| 4      | 6       | 0       | 1.427136                | 1.575426 | -0.609662 | 4                                                                    | -0.0000 | -0.1935 | 0.1084  | 0.0492  | 0.0041 |
| 5      | 6       | 0       | -2.784073               | 1.935212 | -0.110050 | 5                                                                    | 0.0000  | -0.1956 | -0.0180 | 0.0386  | 0.0033 |
| 6      | 6       | 0       | 2.784073                | 1.935212 | -0.110049 | 6                                                                    | 0.0000  | 0.5276  | -0.0368 | 0.2797  | 0.0243 |
| 7      | 6       | 0       | -3.884142               | 1.052927 | -0.028449 | 7                                                                    | 0.1240  | -0.0000 | -0.0000 | 0.0154  | 0.0014 |
| 8      | 6       | 0       | -5.091531               | 1.514201 | 0.527494  | 8                                                                    | 0.0793  | 0.0000  | -0.0000 | 0.0063  | 0.0006 |
| 9      | 6       | 0       | -5.239949               | 2.818622 | 0.984208  | 9                                                                    | -0.3415 | 0.0000  | 0.0000  | 0.1166  | 0.0110 |
| 10     | 6       | 0       | -4.161036               | 3.698087 | 0.896309  | 10                                                                   | 0.0000  | -0.7006 | 0.4138  | 0.6621  | 0.0642 |
| 11     | 6       | 0       | -2.955316               | 3.251614 | 0.366901  | 11                                                                   | -0.0000 | 0.4231  | -0.1255 | 0.1947  | 0.0194 |
| 12     | 6       | 0       | 2.955317                | 3.251613 | 0.366903  | 12                                                                   | 0.0000  | 0.3740  | 0.1699  | 0.1687  | 0.0171 |
| 13     | 6       | 0       | 4.161036                | 3.698086 | 0.896311  | 13                                                                   | 0.0000  | 0.3626  | -0.3713 | 0.2694  | 0.0278 |
| 14     | 6       | 0       | 5.239949                | 2.818621 | 0.984210  | 14                                                                   | 1.2121  | -0.0000 | 0.0000  | 1.4692  | 0.1517 |
| 15     | 6       | 0       | 5.091531                | 1.514200 | 0.527494  | 15                                                                   | -1.9194 | 0.0000  | -0.0000 | 3.6839  | 0.3898 |
| 16     | 6       | 0       | 3.884142                | 1.052926 | -0.028448 | 16                                                                   | 0.0000  | 0.4989  | -1.0808 | 1.4169  | 0.1513 |
| -----  |         |         |                         |          |           | Ground to excited state transition velocity dipole moments (Au):     |         |         |         |         |        |
| state  | X       | Y       | Z                       | Dip. S.  | Osc.      |                                                                      |         |         |         |         |        |
| 1      | 0.1922  | 0.0000  | -0.0000                 | 0.0369   | 0.2737    |                                                                      |         |         |         |         |        |
| 2      | 0.0154  | 0.0000  | -0.0000                 | 0.0002   | 0.0015    |                                                                      |         |         |         |         |        |
| 3      | 0.0254  | -0.0000 | 0.0000                  | 0.0006   | 0.0035    |                                                                      |         |         |         |         |        |
| 4      | 0.0000  | 0.0255  | -0.0120                 | 0.0008   | 0.0043    |                                                                      |         |         |         |         |        |
| 5      | 0.0000  | 0.0249  | 0.0033                  | 0.0006   | 0.0032    |                                                                      |         |         |         |         |        |
| 6      | -0.0000 | -0.0692 | 0.0042                  | 0.0048   | 0.0246    |                                                                      |         |         |         |         |        |
| 7      | -0.0179 | 0.0000  | 0.0000                  | 0.0003   | 0.0016    |                                                                      |         |         |         |         |        |
| 8      | -0.0119 | -0.0000 | -0.0000                 | 0.0001   | 0.0007    |                                                                      |         |         |         |         |        |
| 9      | 0.0473  | -0.0000 | -0.0000                 | 0.0022   | 0.0105    |                                                                      |         |         |         |         |        |
| 10     | 0.0000  | 0.1020  | -0.0621                 | 0.0143   | 0.0653    |                                                                      |         |         |         |         |        |
| 11     | 0.0000  | -0.0638 | 0.0192                  | 0.0044   | 0.0198    |                                                                      |         |         |         |         |        |
| 12     | -0.0000 | -0.0575 | -0.0274                 | 0.0041   | 0.0178    |                                                                      |         |         |         |         |        |
| 13     | -0.0000 | -0.0561 | 0.0569                  | 0.0064   | 0.0275    |                                                                      |         |         |         |         |        |
| 14     | -0.1902 | 0.0000  | -0.0000                 | 0.0362   | 0.1557    |                                                                      |         |         |         |         |        |
| 15     | 0.3032  | -0.0000 | 0.0000                  | 0.0919   | 0.3860    |                                                                      |         |         |         |         |        |
| 16     | -0.0000 | -0.0790 | 0.1752                  | 0.0369   | 0.1537    |                                                                      |         |         |         |         |        |
| -----  |         |         |                         |          |           | Ground to excited state transition magnetic dipole moments (Au):     |         |         |         |         |        |
| state  | X       | Y       | Z                       |          |           |                                                                      |         |         |         |         |        |
| 1      | 0.0000  | 0.1214  | 0.1748                  |          |           |                                                                      |         |         |         |         |        |
| 2      | -0.0000 | 0.2308  | 2.0844                  |          |           |                                                                      |         |         |         |         |        |
| 3      | -0.0000 | -0.4927 | -0.8553                 |          |           |                                                                      |         |         |         |         |        |
| 4      | 0.1170  | 0.0000  | 0.0000                  |          |           |                                                                      |         |         |         |         |        |
| 5      | -0.0583 | 0.0000  | -0.0000                 |          |           |                                                                      |         |         |         |         |        |
| 6      | -0.2362 | 0.0000  | 0.0000                  |          |           |                                                                      |         |         |         |         |        |
| 7      | 0.0000  | -0.2505 | 0.5796                  |          |           |                                                                      |         |         |         |         |        |
| 8      | -0.0000 | -0.0955 | -0.5699                 |          |           |                                                                      |         |         |         |         |        |
| 9      | -0.0000 | -0.5106 | -0.5075                 |          |           |                                                                      |         |         |         |         |        |
| 10     | -0.1333 | 0.0000  | 0.0000                  |          |           |                                                                      |         |         |         |         |        |
| 11     | 0.0387  | -0.0000 | 0.0000                  |          |           |                                                                      |         |         |         |         |        |
| 12     | -0.0890 | 0.0000  | -0.0000                 |          |           |                                                                      |         |         |         |         |        |
| 13     | -0.0479 | 0.0000  | 0.0000                  |          |           |                                                                      |         |         |         |         |        |
| 14     | -0.0000 | 0.0877  | 1.5445                  |          |           |                                                                      |         |         |         |         |        |
| 15     | -0.0000 | -0.0156 | -1.0718                 |          |           |                                                                      |         |         |         |         |        |
| 16     | 0.0837  | -0.0000 | 0.0000                  |          |           |                                                                      |         |         |         |         |        |
| -----  |         |         |                         |          |           | Ground to excited state transition velocity quadrupole moments (Au): |         |         |         |         |        |
| state  | XX      | YY      | ZZ                      | XY       | XZ        | YZ                                                                   |         |         |         |         |        |
| 1      | 0.0000  | 0.0000  | -0.0000                 | -0.0289  | -0.1675   | 0.0000                                                               |         |         |         |         |        |
| 2      | 0.0000  | 0.0000  | 0.0000                  | -0.2130  | -0.1389   | 0.0000                                                               |         |         |         |         |        |
| 3      | 0.0000  | -0.0000 | -0.0000                 | 0.6551   | 0.2340    | -0.0000                                                              |         |         |         |         |        |
| 4      | 0.2085  | 0.0201  | -0.0168                 | -0.0000  | -0.0000   | 0.0803                                                               |         |         |         |         |        |
| 5      | -0.4995 | 0.1186  | 0.0228                  | -0.0000  | -0.0000   | -0.1255                                                              |         |         |         |         |        |
| 6      | -0.5801 | 0.0914  | 0.0981                  | 0.0000   | 0.0000    | -0.1611                                                              |         |         |         |         |        |
| 7      | -0.0000 | -0.0000 | -0.0000                 | 0.6864   | 0.3450    | -0.0000                                                              |         |         |         |         |        |
| 8      | -0.0000 | -0.0000 | -0.0000                 | 0.1150   | 0.0994    | -0.0000                                                              |         |         |         |         |        |
| 9      | -0.0000 | -0.0000 | 0.0000                  | 0.3644   | -0.0727   | 0.0000                                                               |         |         |         |         |        |
| 10     | 0.4798  | -0.1009 | -0.1557                 | -0.0000  | 0.0000    | 0.0000                                                               |         |         |         |         |        |
| 11     | 0.3081  | 0.0743  | 0.0699                  | -0.0000  | 0.0000    | 0.0000                                                               |         |         |         |         |        |
| 12     | 0.1028  | 0.0302  | 0.0629                  | -0.0000  | -0.0000   | -0.0000                                                              |         |         |         |         |        |
| 13     | -1.1600 | 0.0111  | 0.2054                  | -0.0000  | 0.0000    | -                                                                    |         |         |         |         |        |
| 14     | 0.0000  | -0.0000 | -0.0000                 | -0.1169  | 0.0011    | 0.0000                                                               |         |         |         |         |        |
| 15     | -0.0000 | 0.0000  | 0.0000                  | -0.0817  | -0.5137   | -                                                                    |         |         |         |         |        |
| 16     | 0.0000  | 0.0000  | 0.0000                  | 0.0000   | 0.0000    | 0.0000                                                               |         |         |         |         |        |

  

|                                              |                             |          |
|----------------------------------------------|-----------------------------|----------|
| SCF Done: E(RB3LYP) = -1461.31461057         | A.U. after                  | 1 cycles |
| imaginary vibration = 0                      |                             |          |
| Zero-point correction=                       | 0.470896 (Hartree/Particle) |          |
| Thermal correction to Energy=                | 0.495913                    |          |
| Thermal correction to Enthalpy=              | 0.496858                    |          |
| Thermal correction to Gibbs Free Energy=     | 0.419002                    |          |
| Sum of electronic and zero-point Energies=   | -1461.204502                |          |
| Sum of electronic and thermal Energies=      | -1461.179485                |          |
| Sum of electronic and thermal Enthalpies=    | -1461.178541                |          |
| Sum of electronic and thermal Free Energies= | -1461.256396                |          |

16 -0.5789 0.5438 0.2633 -0.0000 0.0000 - 125 -> 128 0.61909

0.6014

$\langle 0 | \text{del} | b \rangle * \langle b | \text{rxdel} | 0 \rangle + \langle 0 | \text{del} | b \rangle * \langle b | \text{delr} + \text{rdel} | 0 \rangle$

Rotatory Strengths (R) in cgs ( $10^{*-40}$  erg-esu-cm/Gauss)

| state | XX      | YY      | ZZ      | R(velocity) | E-M Angle | Excited State |           |           |           |           |          |
|-------|---------|---------|---------|-------------|-----------|---------------|-----------|-----------|-----------|-----------|----------|
| 1     | 0.0002  | 0.0020  | -0.0008 | 0.0005      | 90.00     | 5:            | Singlet-A | 3.5302 eV | 351.21 nm | f=0.0033  |          |
| 2     | -0.0012 | -0.0015 | -0.0001 | -0.0009     | 90.00     |               |           |           |           |           |          |
| 3     | 0.0003  | -0.0011 | 0.0002  | -0.0002     | 90.00     |               |           |           |           |           |          |
| 4     | 0.0002  | -0.0001 | 0.0000  | 0.0000      | 90.00     |               |           |           |           |           |          |
| 5     | 0.0002  | -0.0000 | -0.0001 | 0.0000      | 90.00     | Excited State | 6:        | Singlet-A | 3.5440 eV | 349.84 nm | f=0.0243 |
| 6     | 0.0000  | 0.0002  | -0.0001 | 0.0000      | 90.00     | <S**2>=0.000  |           |           |           |           |          |
| 7     | -0.0004 | -0.0001 | -0.0000 | -0.0002     | 90.00     |               |           |           |           |           |          |
| 8     | 0.0001  | 0.0002  | -0.0000 | 0.0001      | 90.00     |               |           |           |           |           |          |
| 9     | 0.0003  | 0.0003  | 0.0001  | 0.0003      | 90.00     |               |           |           |           |           |          |
| 10    | -0.0011 | -0.0004 | 0.0007  | -0.0003     | 90.00     |               |           |           |           |           |          |
| 11    | 0.0003  | 0.0002  | -0.0000 | 0.0002      | 90.00     |               |           |           |           |           |          |
| 12    | -0.0002 | -0.0001 | -0.0000 | -0.0001     | 90.00     |               |           |           |           |           |          |
| 13    | 0.0011  | 0.0040  | -0.0024 | 0.0009      | 90.00     | Excited State | 7:        | Singlet-A | 3.6398 eV | 340.63 nm | f=0.0014 |
| 14    | -0.0005 | -0.0011 | 0.0017  | 0.0000      | 90.00     | <S**2>=0.000  |           |           |           |           |          |
| 15    | -0.0013 | -0.0031 | 0.0010  | -0.0011     | 90.00     |               |           |           |           |           |          |
| 16    | -0.0002 | 0.0012  | -0.0010 | 0.0000      | 90.00     |               |           |           |           |           |          |

$1/2[\langle 0 | \text{r} | b \rangle * \langle b | \text{rxdel} | 0 \rangle + (\langle 0 | \text{rxdel} | b \rangle * \langle b | \text{r} | 0 \rangle)^*]$

Rotatory Strengths (R) in cgs ( $10^{*-40}$  erg-esu-cm/Gauss)

| state | XX      | YY      | ZZ      | R(length) | Excited State |           |           |           |           |          |  |
|-------|---------|---------|---------|-----------|---------------|-----------|-----------|-----------|-----------|----------|--|
| 1     | 0.0013  | 0.0000  | -0.0002 | 0.0004    | 8:            | Singlet-A | 3.6553 eV | 339.19 nm | f=0.0006  |          |  |
| 2     | -0.0001 | -0.0000 | -0.0011 | -0.0004   |               |           |           |           |           |          |  |
| 3     | -0.0001 | -0.0000 | -0.0005 | -0.0002   |               |           |           |           |           |          |  |
| 4     | 0.0001  | 0.0001  | -0.0001 | 0.0000    | Excited State | 9:        | Singlet-A | 3.8410 eV | 322.79 nm | f=0.0110 |  |
| 5     | 0.0000  | 0.0002  | -0.0000 | 0.0001    | <S**2>=0.000  |           |           |           |           |          |  |
| 6     | 0.0000  | -0.0002 | 0.0001  | -0.0000   |               |           |           |           |           |          |  |
| 7     | -0.0002 | -0.0006 | 0.0003  | -0.0002   |               |           |           |           |           |          |  |
| 8     | 0.0001  | 0.0001  | -0.0001 | 0.0000    |               |           |           |           |           |          |  |
| 9     | -0.0002 | 0.0002  | 0.0001  | 0.0001    | Excited State | 10:       | Singlet-A | 3.9568 eV | 313.34 nm | f=0.0642 |  |
| 10    | 0.0000  | 0.0001  | -0.0009 | -0.0002   | <S**2>=0.000  |           |           |           |           |          |  |
| 11    | 0.0000  | 0.0002  | 0.0003  | 0.0002    |               |           |           |           |           |          |  |
| 12    | 0.0001  | -0.0006 | 0.0002  | -0.0001   |               |           |           |           |           |          |  |
| 13    | 0.0003  | -0.0002 | 0.0026  | 0.0009    |               |           |           |           |           |          |  |
| 14    | 0.0011  | 0.0001  | -0.0015 | -0.0001   |               |           |           |           |           |          |  |
| 15    | -0.0017 | 0.0000  | -0.0024 | -0.0014   |               |           |           |           |           |          |  |
| 16    | -0.0003 | 0.0003  | 0.0000  | 0.0000    |               |           |           |           |           |          |  |

$1/2[\langle 0 | \text{del} | b \rangle * \langle b | \text{r} | 0 \rangle + (\langle 0 | \text{r} | b \rangle * \langle b | \text{del} | 0 \rangle)^*]$  (Au)

| state | X       | Y       | Z       | Dip. S. | Osc. (frdel) | Excited State |           |           |           |           |          |
|-------|---------|---------|---------|---------|--------------|---------------|-----------|-----------|-----------|-----------|----------|
| 1     | -0.4061 | -0.0000 | -0.0000 | 0.4061  | 0.2708       | 11:           | Singlet-A | 4.0767 eV | 304.13 nm | f=0.0194  |          |
| 2     | -0.0021 | 0.0000  | -0.0000 | 0.0021  | 0.0014       | <S**2>=0.000  |           |           |           |           |          |
| 3     | -0.0053 | 0.0000  | -0.0000 | 0.0053  | 0.0035       |               |           |           |           |           |          |
| 4     | -0.0000 | -0.0049 | -0.0013 | 0.0062  | 0.0042       |               |           |           |           |           |          |
| 5     | 0.0000  | -0.0049 | -0.0001 | 0.0049  | 0.0033       |               |           |           |           |           |          |
| 6     | -0.0000 | -0.0365 | -0.0002 | 0.0366  | 0.0244       |               |           |           |           |           |          |
| 7     | -0.0022 | -0.0000 | -0.0000 | 0.0022  | 0.0015       |               |           |           |           |           |          |
| 8     | -0.0009 | -0.0000 | 0.0000  | 0.0009  | 0.0006       | Excited State | 12:       | Singlet-A | 4.1320 eV | 300.06 nm | f=0.0171 |
| 9     | -0.0161 | -0.0000 | -0.0000 | 0.0161  | 0.0108       | <S**2>=0.000  |           |           |           |           |          |
| 10    | 0.0000  | -0.0714 | -0.0257 | 0.0971  | 0.0648       |               |           |           |           |           |          |
| 11    | -0.0000 | -0.0270 | -0.0024 | 0.0294  | 0.0196       |               |           |           |           |           |          |
| 12    | -0.0000 | -0.0215 | -0.0047 | 0.0262  | 0.0175       |               |           |           |           |           |          |
| 13    | -0.0000 | -0.0203 | -0.0211 | 0.0415  | 0.0276       |               |           |           |           |           |          |
| 14    | -0.2306 | -0.0000 | -0.0000 | 0.2306  | 0.1537       |               |           |           |           |           |          |
| 15    | -0.5819 | -0.0000 | -0.0000 | 0.5819  | 0.3879       |               |           |           |           |           |          |
| 16    | -0.0000 | -0.0394 | -0.1893 | 0.2287  | 0.1525       | Excited State | 13:       | Singlet-A | 4.2080 eV | 294.64 nm | f=0.0278 |
|       |         |         |         |         |              | <S**2>=0.000  |           |           |           |           |          |

Excitation energies and oscillator strengths:

|                  |           |           |           |          |            |          |
|------------------|-----------|-----------|-----------|----------|------------|----------|
| Excited State 1: | Singlet-A | 2.4478 eV | 506.51 nm | f=0.2679 | 119 -> 126 | -0.32830 |
| <S**2>=0.000     |           |           |           |          | 120 -> 126 | 0.54823  |
|                  |           |           |           |          | 124 -> 128 | -0.10100 |
|                  |           |           |           |          | 125 -> 132 | -0.22980 |
| 125 -> 126       | 0.70284   |           |           |          |            |          |

This state for optimization and/or second-order correction.

Total Energy, E(TD-HF/TD-DFT) = -1461.58544284

Copying the excited state density for this state as the 1-particle RhoCI density.

|                   |           |           |           |          |            |         |
|-------------------|-----------|-----------|-----------|----------|------------|---------|
| Excited State 14: | Singlet-A | 4.2152 eV | 294.14 nm | f=0.1517 | 118 -> 126 | 0.41504 |
| <S**2>=0.000      |           |           |           |          | 124 -> 127 | 0.55177 |

|                  |           |           |           |          |                   |           |           |           |          |
|------------------|-----------|-----------|-----------|----------|-------------------|-----------|-----------|-----------|----------|
| Excited State 2: | Singlet-A | 2.9627 eV | 418.49 nm | f=0.0013 | Excited State 15: | Singlet-A | 4.3194 eV | 287.04 nm | f=0.3898 |
| <S**2>=0.000     |           |           |           |          | <S**2>=0.000      |           |           |           |          |
| 125 -> 127       | 0.70116   |           |           |          | 118 -> 126        | 0.54766   |           |           |          |
|                  |           |           |           |          | 124 -> 127        | -0.41545  |           |           |          |

|                  |           |           |           |          |                   |           |           |           |          |
|------------------|-----------|-----------|-----------|----------|-------------------|-----------|-----------|-----------|----------|
| Excited State 3: | Singlet-A | 3.3227 eV | 373.15 nm | f=0.0035 | Excited State 16: | Singlet-A | 4.3588 eV | 284.44 nm | f=0.1513 |
| <S**2>=0.000     |           |           |           |          | <S**2>=0.000      |           |           |           |          |
| 124 -> 126       | 0.68843   |           |           |          | 119 -> 126        | 0.41166   |           |           |          |
| 125 -> 129       | -0.11439  |           |           |          | 120 -> 126        | 0.18590   |           |           |          |

|                  |           |           |           |          |            |          |
|------------------|-----------|-----------|-----------|----------|------------|----------|
| Excited State 4: | Singlet-A | 3.3766 eV | 367.19 nm | f=0.0041 | 121 -> 126 | 0.18824  |
| <S**2>=0.000     |           |           |           |          | 123 -> 127 | -0.38011 |
| 121 -> 126       | 0.30801   |           |           |          |            |          |

**Table S10.** Molecular geometries and thermodynamic parameters of the optimized structure of Intermediate-Ant7 in a local minimum calculated at the B3LYP/6-31G(d) level of theory. Frequency vibrational calculation was performed at B3LYP/6-311G(2d,p).

| Atomic Type | Coordinates (Angstroms) |             |             |   |             |             |             |
|-------------|-------------------------|-------------|-------------|---|-------------|-------------|-------------|
|             | X                       | Y           | Z           |   |             |             |             |
| C           | -1.41149600             | 0.71970200  | -0.43741400 | C | 0.27265000  | 4.43448200  | 0.49894100  |
| C           | -0.74806700             | -0.37853900 | 0.16319200  | C | -0.99783900 | 4.39362500  | -0.12939300 |
| C           | 0.71141100              | -0.39553200 | 0.16347300  | C | -1.50903400 | 3.19008000  | -0.53719200 |
| C           | 1.41278800              | 0.84522400  | 0.01391000  | H | -1.34733600 | -3.36291700 | 1.70712700  |
| C           | 0.59799900              | 2.03646800  | 0.08041600  | H | 1.02012500  | -3.64969900 | 1.17097400  |
| C           | -0.77353600             | 1.97430800  | -0.35845400 | H | 5.86894400  | -0.00236900 | 1.22332100  |
| C           | -1.50250800             | -1.43534700 | 0.79272100  | H | 6.48739800  | 2.34755800  | 0.82982600  |
| C           | -0.82370100             | -2.56669300 | 1.18764700  | H | 4.93935100  | 3.76114900  | -0.57682900 |
| C           | 0.54325300              | -2.71090700 | 0.91380300  | H | 2.68620000  | 2.94758700  | -1.03646900 |
| C           | 1.31948900              | -1.69769600 | 0.37061400  | H | 1.88567300  | -3.97806800 | -0.74022300 |
| C           | 2.88657900              | 1.04308500  | -0.04914900 | H | 4.03990100  | -5.00395500 | -1.30323400 |
| C           | 3.91013400              | 0.12336800  | 0.35134300  | H | 6.14586300  | -3.66660100 | -1.00481500 |
| C           | 5.15069900              | 0.66083800  | 0.75321400  | H | 5.99171700  | -1.34879400 | -0.27446600 |
| C           | 5.51616100              | 1.97938500  | 0.51167000  | H | -6.00688900 | -0.04166500 | 0.60124300  |
| C           | 4.64523300              | 2.77412200  | -0.23108100 | H | -6.43203000 | -0.79818000 | 2.91259700  |
| C           | 3.36351100              | 2.30425800  | -0.49077400 | H | -4.56313200 | -1.80694600 | 4.23641800  |
| C           | 2.68677000              | -2.10887500 | -0.03654600 | H | -2.33400000 | -2.02808400 | 3.21994200  |
| C           | 2.79552500              | -3.41587100 | -0.56451900 | H | -1.70718000 | 1.53715600  | -2.90445700 |
| C           | 4.01125200              | -3.99678900 | -0.89677000 | H | -3.55908800 | 1.15718700  | -4.49008000 |
| C           | 5.17770500              | -3.25362300 | -0.73525200 | H | -5.56535800 | -0.14504200 | -3.75714700 |
| C           | 5.08680700              | -1.94292300 | -0.28799400 | H | -5.68061000 | -0.99850900 | -1.44249800 |
| C           | 3.86225100              | -1.33489300 | 0.07587800  | H | 1.99288000  | 3.35170700  | 1.10094800  |
| C           | -2.88807700             | -1.22414600 | 1.30233800  | H | 0.63492500  | 5.36410000  | 0.92940500  |
| C           | -3.94527700             | -0.64876200 | 0.56247900  | H | -1.58967700 | 5.29996700  | -0.22362300 |
| C           | -5.20771900             | -0.51069500 | 1.16735700  | H | -2.52301800 | 3.12731700  | -0.91623900 |
| C           | -5.44778300             | -0.92903400 | 2.47125400  |   |             |             |             |
| C           | -4.40632700             | -1.49218700 | 3.20826000  |   |             |             |             |
| C           | -3.14972900             | -1.62627500 | 2.62762000  |   |             |             |             |
| C           | -2.63556100             | 0.51609500  | -1.25382000 |   |             |             |             |
| C           | -2.59120300             | 0.99824500  | -2.57804100 |   |             |             |             |
| C           | -3.63211800             | 0.77919700  | -3.47395600 |   |             |             |             |
| C           | -4.75203300             | 0.05414500  | -3.06474700 |   |             |             |             |
| C           | -4.81636300             | -0.42250900 | -1.75981200 |   |             |             |             |
| C           | -3.77965800             | -0.19856700 | -0.83667300 |   |             |             |             |
| C           | 1.03902300              | 3.29876400  | 0.59181900  |   |             |             |             |

  

|                                                           |  |              |                    |
|-----------------------------------------------------------|--|--------------|--------------------|
| SCF Done: E(RB3LYP) = -1461.28153066 A.U. after 16 cycles |  |              |                    |
| imaginary vibration = 0                                   |  |              |                    |
| Zero-point correction=                                    |  | 0.471000     | (Hartree/Particle) |
| Thermal correction to Energy=                             |  | 0.495958     |                    |
| Thermal correction to Enthalpy=                           |  | 0.496902     |                    |
| Thermal correction to Gibbs Free Energy=                  |  | 0.419045     |                    |
| Sum of electronic and zero-point Energies=                |  | -1461.172071 |                    |
| Sum of electronic and thermal Energies=                   |  | -1461.147113 |                    |
| Sum of electronic and thermal Enthalpies=                 |  | -1461.146169 |                    |
| Sum of electronic and thermal Free Energies=              |  | -1461.224027 |                    |

**Table S11.** Molecular geometries and thermodynamic parameters of the optimized structure of TS1-Naph7 in a transition state calculated at the B3LYP/6-31G(d) level of theory. Frequency vibrational calculation was performed at B3LYP/6-311G(2d,p).

| Atomic Type | Coordinates (Angstroms) |             |             |   |             |             |             |
|-------------|-------------------------|-------------|-------------|---|-------------|-------------|-------------|
|             | X                       | Y           | Z           |   |             |             |             |
| C           | -1.49415900             | -1.25110100 | -0.13371200 | C | -2.82056600 | -1.49283900 | 0.50739100  |
| C           | -0.79265700             | -0.00470100 | -0.02825000 | C | -2.92522500 | -2.65258300 | 1.30364900  |
| C           | 0.66418000              | 0.03212300  | -0.08886000 | C | -4.09704900 | -2.99436600 | 1.96959200  |
| C           | 1.34712500              | -1.13517100 | -0.58491800 | C | -5.21042100 | -2.16086700 | 1.87126400  |
| C           | 0.58034200              | -2.27418000 | -0.83865100 | C | -5.12535700 | -1.00474200 | 1.10460300  |
| C           | -0.78792600             | -2.34921900 | -0.58656500 | C | -3.95196700 | -0.65286500 | 0.41194400  |
| C           | -1.52640400             | 1.21309400  | 0.17811100  | H | 1.07556200  | -3.18990300 | -1.13230100 |
| C           | -0.85382200             | 2.26673400  | 0.76173600  | H | -1.28766700 | -3.30711700 | -0.69199200 |
| C           | 0.52916100              | 2.21483700  | 0.95432700  | H | -1.39512000 | 3.16588500  | 1.04253500  |
| C           | 1.33076400              | 1.21683900  | 0.39664300  | H | 0.99140600  | 3.02585900  | 1.50129000  |
| C           | 2.81441200              | -1.34670000 | -0.76868700 | H | 5.83939500  | -1.28807200 | 0.77993300  |
| C           | 3.86143600              | -0.81511600 | 0.03915700  | H | 6.28718500  | -3.14020200 | -0.70423700 |
| C           | 5.06324800              | -1.56050800 | 0.07788300  | H | 4.63389000  | -3.67737800 | -2.53189100 |
| C           | 5.33718500              | -2.61832200 | -0.77707600 | H | 2.43694400  | -2.59110300 | -2.48307300 |
| C           | 4.41154100              | -2.93797400 | -1.76778600 | H | 2.37244600  | 3.59891000  | 0.16534800  |
| C           | 3.17326300              | -2.31461200 | -1.73725400 | H | 4.57326300  | 4.43516800  | 0.82002800  |
| C           | 2.79560800              | 1.50691600  | 0.44461900  | H | 6.33637500  | 2.78008900  | 1.53441200  |
| C           | 3.13102600              | 2.88346000  | 0.45758500  | H | 5.93054100  | 0.42856100  | 1.22286000  |
| C           | 4.37800800              | 3.36655700  | 0.82306500  | H | -5.95775100 | 0.21766400  | -1.11679300 |
| C           | 5.35822000              | 2.45160600  | 1.19435200  | H | -6.14727900 | 2.33300600  | -2.37314600 |
| C           | 5.10211300              | 1.09712200  | 1.03853000  | H | -4.21675900 | 3.92534600  | -2.39715100 |
| C           | 3.86600300              | 0.57556500  | 0.59043400  | H | -2.13710500 | 3.33066300  | -1.21751600 |
| C           | -2.85945900             | 1.46038800  | -0.43829800 | H | -2.04957900 | -3.28191700 | 1.42329700  |
| C           | -3.96120300             | 0.57844900  | -0.40558800 | H | -4.12973100 | -3.89330200 | 2.57917700  |
| C           | -5.12716600             | 0.91699700  | -1.11575500 | H | -6.12927300 | -2.39657700 | 2.40118000  |
| C           | -5.23548800             | 2.10678300  | -1.82711800 | H | -5.97907200 | -0.33603600 | 1.05339900  |
| C           | -4.15898900             | 2.99319200  | -1.84171400 |   |             |             |             |
| C           | -2.99038800             | 2.66194900  | -1.16387900 |   |             |             |             |

  

|                                                           |  |          |                    |
|-----------------------------------------------------------|--|----------|--------------------|
| SCF Done: E(RB3LYP) = -1307.65723452 A.U. after 15 cycles |  |          |                    |
| imaginary vibration = 1                                   |  |          |                    |
| Zero-point correction=                                    |  | 0.425051 | (Hartree/Particle) |

|                                            |              |                                              |              |
|--------------------------------------------|--------------|----------------------------------------------|--------------|
| Thermal correction to Energy=              | 0.446541     | Sum of electronic and thermal Energies=      | -1307.535513 |
| Thermal correction to Enthalpy=            | 0.447485     | Sum of electronic and thermal Enthalpies=    | -1307.534569 |
| Thermal correction to Gibbs Free Energy=   | 0.377134     | Sum of electronic and thermal Free Energies= | -1307.604919 |
| Sum of electronic and zero-point Energies= | -1307.557003 |                                              |              |

**Table S12.** Molecular geometries and thermodynamic parameters of the optimized structure of TS1-Ant7 in a transition state calculated at the B3LYP/6-31G(d) level of theory. Frequency vibrational calculations were performed at B3LYP-6-31G(d) and B3LYP/6-311G(2d,p).

| -----  |                         |             |             |                                              |              |                    |             |
|--------|-------------------------|-------------|-------------|----------------------------------------------|--------------|--------------------|-------------|
| Atomic | Coordinates (Angstroms) |             |             |                                              |              |                    |             |
| Type   | X                       | Y           | Z           |                                              |              |                    |             |
| -----  |                         |             |             |                                              |              |                    |             |
| C      | -1.47040700             | 0.76962700  | -0.18303100 | H                                            | 6.32794000   | 2.69435500         | 0.66883400  |
| C      | -0.76263600             | -0.44664300 | -0.01249400 | H                                            | 4.55139400   | 4.04821100         | -0.50738200 |
| C      | 0.70159200              | -0.42397500 | -0.02538800 | H                                            | 2.32125600   | 3.06041900         | -0.77805700 |
| C      | 1.35723200              | 0.82468700  | 0.16832800  | H                                            | 2.27945800   | -3.60982300        | -1.69760000 |
| C      | 0.54453000              | 1.92317900  | 0.61914400  | H                                            | 4.51320300   | -4.59011400        | -1.86969700 |
| C      | -0.85575900             | 1.94829000  | 0.28767700  | H                                            | 6.42893500   | -3.46473300        | -0.68027700 |
| C      | -1.47928100             | -1.67736700 | 0.20664200  | H                                            | 6.08014400   | -1.30529600        | 0.32472400  |
| C      | -0.76118500             | -2.85190900 | 0.17732800  | H                                            | -6.02532500  | -0.46178700        | 0.58013000  |
| C      | 0.61856800              | -2.85211700 | -0.05859200 | H                                            | -6.37317900  | -2.00363500        | 2.47689200  |
| C      | 1.37829700              | -1.69503800 | -0.19296700 | H                                            | -4.44528000  | -3.35183600        | 3.33081300  |
| C      | 2.80657400              | 1.12386700  | 0.01600700  | H                                            | -2.23713900  | -3.12123800        | 2.27323200  |
| C      | 3.91239000              | 0.27017300  | 0.31949100  | H                                            | -1.84812900  | 2.38946400         | -2.20028600 |
| C      | 5.12864700              | 0.91346100  | 0.64266900  | H                                            | -3.72621700  | 2.53672500         | -3.79098600 |
| C      | 5.36234000              | 2.26392400  | 0.41837300  | H                                            | -5.68509000  | 1.00100300         | -3.53644700 |
| C      | 4.37173800              | 3.02156500  | -0.20159400 | H                                            | -5.72418700  | -0.61694200        | -1.67080500 |
| C      | 3.11777400              | 2.45073500  | -0.36939600 | H                                            | 2.06103900   | 2.96978600         | 1.76969000  |
| C      | 2.82644500              | -1.94296000 | -0.45108300 | H                                            | 0.67438300   | 4.89707800         | 2.32856800  |
| C      | 3.10068400              | -3.12275400 | -1.18601600 | H                                            | -1.67890400  | 5.05153300         | 1.48516300  |
| C      | 4.36431400              | -3.68153500 | -1.29307600 | H                                            | -2.66134300  | 3.14877800         | 0.26870200  |
| C      | 5.42582600              | -3.04837800 | -0.65293100 | -----                                        |              |                    |             |
| C      | 5.20642000              | -1.82016700 | -0.04779400 | SCF Done: E(RB3LYP) = -1461.28055811         | A.U. after   | 16                 | cycles      |
| C      | 3.93901900              | -1.19435800 | 0.02687800  | B3LYP/6-311G(2d,p)                           |              |                    |             |
| C      | -2.85932400             | -1.70941900 | 0.77258900  | imaginary vibration = 0                      |              |                    |             |
| C      | -3.94962800             | -0.94551700 | 0.30083600  | Zero-point correction=                       | 0.470935     | (Hartree/Particle) |             |
| C      | -5.20029100             | -1.07399900 | 0.93176400  | Thermal correction to Energy=                | 0.496017     |                    |             |
| C      | -5.39689000             | -1.93574100 | 2.00473500  | Thermal correction to Enthalpy=              | 0.496962     |                    |             |
| C      | -4.32262500             | -2.68773500 | 2.47952100  | Thermal correction to Gibbs Free Energy=     | 0.418316     |                    |             |
| C      | -3.07759200             | -2.56407500 | 1.87232500  | Sum of electronic and zero-point Energies=   | -1461.171443 |                    |             |
| C      | -2.71122600             | 0.82556500  | -1.00057100 | Sum of electronic and thermal Energies=      | -1461.146360 |                    |             |
| C      | -2.71076600             | 1.74345200  | -2.07154300 | Sum of electronic and thermal Enthalpies=    | -1461.145416 |                    |             |
| C      | -3.76702400             | 1.82319800  | -2.97245200 | Sum of electronic and thermal Free Energies= | -1461.224062 |                    |             |
| C      | -4.86030100             | 0.96776100  | -2.82988000 | -----                                        |              |                    |             |
| C      | -4.88192900             | 0.06041700  | -1.77645500 | B3LYP/6-31G(d)                               |              |                    |             |
| C      | -3.82868500             | -0.02385200 | -0.84848400 | imaginary vibration = 1                      |              |                    |             |
| C      | 1.04629800              | 3.01766900  | 1.39483100  | Zero-point correction=                       | 0.475570     | (Hartree/Particle) |             |
| C      | 0.26731100              | 4.10257800  | 1.70907000  | Thermal correction to Energy=                | 0.500165     |                    |             |
| C      | -1.07194300             | 4.18236200  | 1.24648400  | Thermal correction to Enthalpy=              | 0.501109     |                    |             |
| C      | -1.61546600             | 3.13230900  | 0.55501700  | Thermal correction to Gibbs Free Energy=     | 0.423588     |                    |             |
| H      | -1.25836900             | -3.79675900 | 0.37298200  | Sum of electronic and zero-point Energies=   | -1460.804988 |                    |             |
| H      | 1.12007600              | -3.81115200 | -0.05039700 | Sum of electronic and thermal Energies=      | -1460.780393 |                    |             |
| H      | 5.94710600              | 0.33230400  | 1.04643600  | Sum of electronic and thermal Enthalpies=    | -1460.779449 |                    |             |
|        |                         |             |             | Sum of electronic and thermal Free Energies= | -1460.856970 |                    |             |

**Table S13.** Molecular geometries and thermodynamic parameters of the optimized structure of TS2-Ant7 in a transition state calculated at the B3LYP/6-31G(d) level of theory. Frequency vibrational calculation was performed at B3LYP/6-31G(d).

| -----  |                         |             |             |   |             |             |             |
|--------|-------------------------|-------------|-------------|---|-------------|-------------|-------------|
| Atomic | Coordinates (Angstroms) |             |             |   |             |             |             |
| Type   | X                       | Y           | Z           |   |             |             |             |
| -----  |                         |             |             |   |             |             |             |
| C      | -1.32493400             | 0.64490600  | -0.52167700 | C | 2.49743100  | -3.21227400 | -0.99245800 |
| C      | -0.68114100             | -0.31590300 | 0.27950000  | C | 3.55837900  | -3.63466100 | -1.78575900 |
| C      | 0.76492900              | -0.27230600 | 0.33658400  | C | 4.69563300  | -2.83354200 | -1.89269000 |
| C      | 1.44837000              | 0.98428000  | 0.22962000  | C | 4.75650400  | -1.63581100 | -1.18826800 |
| C      | 0.57892100              | 2.13056700  | 0.00895500  | C | 3.70181900  | -1.21194500 | -0.35654600 |
| C      | -0.69950300             | 1.90840800  | -0.64006000 | C | -2.79791300 | -1.06302800 | 1.49409000  |
| C      | -1.41248700             | -1.32692000 | 1.01924100  | C | -3.84389600 | -0.57848300 | 0.67554500  |
| C      | -0.71691600             | -2.41008200 | 1.50125100  | C | -5.10627000 | -0.34683500 | 1.24948000  |
| C      | 0.62952200              | -2.59487000 | 1.11778900  | C | -5.35699200 | -0.59205500 | 2.59545800  |
| C      | 1.35466200              | -1.60169800 | 0.49482600  | C | -4.32948500 | -1.07761800 | 3.40412900  |
| C      | 2.93219600              | 1.11217100  | 0.48364200  | C | -3.07055400 | -1.29918100 | 2.85525100  |
| C      | 3.87976800              | 0.03824200  | 0.41531700  | C | -2.52312600 | 0.26531700  | -1.31540900 |
| C      | 5.16823100              | 0.19705000  | 0.96263400  | C | -2.45217300 | 0.46210200  | -2.70891900 |
| C      | 5.63802900              | 1.40505900  | 1.45582700  | C | -3.48179400 | 0.07024700  | -3.55795800 |
| C      | 4.81278100              | 2.51290900  | 1.31012500  | C | -4.61570800 | -0.54514100 | -3.02652200 |
| C      | 3.51769000              | 2.35578800  | 0.82918300  | C | -4.69833000 | -0.75457000 | -1.65413900 |
| C      | 2.55265900              | -2.00530100 | -0.26688000 | C | -3.67057700 | -0.35959700 | -0.77905600 |
|        |                         |             |             | C | 0.79952200  | 3.49343000  | 0.39547400  |
|        |                         |             |             | C | 0.03923800  | 4.53984200  | -0.07338700 |
|        |                         |             |             | C | -1.04353000 | 4.30937900  | -0.94966400 |
|        |                         |             |             | C | -1.42426000 | 3.01454900  | -1.18582200 |

|   |             |             |             |   |             |            |             |
|---|-------------|-------------|-------------|---|-------------|------------|-------------|
| H | -1.21791500 | -3.15984300 | 2.10565600  | H | 1.51160100  | 3.72823400 | 1.16794400  |
| H | 1.09856700  | -3.56123200 | 1.27698500  | H | 0.25284300  | 5.54711600 | 0.27417700  |
| H | 5.81967300  | -0.67105800 | 0.97149600  | H | -1.62492200 | 5.13797600 | -1.34368900 |
| H | 6.63315300  | 1.48410500  | 1.88403000  | H | -2.34665200 | 2.81232700 | -1.71681300 |
| H | 5.15858200  | 3.50862400  | 1.57480900  |   |             |            |             |
| H | 2.96843100  | 3.26315700  | 0.69068800  |   |             |            |             |
| H | 1.58879900  | -3.80427400 | -0.95389500 |   |             |            |             |
| H | 3.48386500  | -4.56691400 | -2.33906400 |   |             |            |             |
| H | 5.52248300  | -3.12895600 | -2.53284000 |   |             |            |             |
| H | 5.62958900  | -0.99928600 | -1.29087900 |   |             |            |             |
| H | -5.89817400 | 0.05103600  | 0.62168800  |   |             |            |             |
| H | -6.34100900 | -0.39224700 | 3.01065100  |   |             |            |             |
| H | -4.49881900 | -1.26285400 | 4.46137900  |   |             |            |             |
| H | -2.26195800 | -1.63715400 | 3.49588900  |   |             |            |             |
| H | -1.55804400 | 0.91648300  | -3.12470100 |   |             |            |             |
| H | -3.38952600 | 0.23004100  | -4.62874200 |   |             |            |             |
| H | -5.42300700 | -0.87238800 | -3.67591500 |   |             |            |             |
| H | -5.56773800 | -1.25737600 | -1.24110700 |   |             |            |             |

SCF Done: E(RB3LYP) = -1461.27556576 A.U. after 16 cycles

imaginary vibration = 1

|                                              |                             |
|----------------------------------------------|-----------------------------|
| Zero-point correction=                       | 0.470626 (Hartree/Particle) |
| Thermal correction to Energy=                | 0.494971                    |
| Thermal correction to Enthalpy=              | 0.495915                    |
| Thermal correction to Gibbs Free Energy=     | 0.419832                    |
| Sum of electronic and zero-point Energies=   | -1461.167559                |
| Sum of electronic and thermal Energies=      | -1461.143214                |
| Sum of electronic and thermal Enthalpies=    | -1461.142270                |
| Sum of electronic and thermal Free Energies= | -1461.218353                |

**Table S14.** Molecular geometries of twisted-Naph7-H generated by substituting the diphenylene moieties of the energy-minimized structure of twisted-Naph7, calculated at the B3LYP/6-31G(d) level, with hydrogen atoms. Single point calculation was performed at B3LYP/6-311G(2d,p) level.

| Center Number | Atomic Number | Atomic Type | Coordinates (Angstroms) |           |           |
|---------------|---------------|-------------|-------------------------|-----------|-----------|
|               |               |             | X                       | Y         | Z         |
| 1             | 6             | 0           | 1.386898                | 0.273675  | -1.236925 |
| 2             | 6             | 0           | 0.676364                | 0.188372  | -2.416004 |
| 3             | 6             | 0           | -0.676328               | -0.188158 | -2.416025 |
| 4             | 6             | 0           | -1.386877               | -0.273545 | -1.236963 |
| 5             | 6             | 0           | 0.717147                | 0.000047  | 0.000006  |
| 6             | 6             | 0           | -0.717148               | 0.000047  | -0.000006 |
| 7             | 6             | 0           | -1.386898               | 0.273660  | 1.236929  |
| 8             | 6             | 0           | -0.676363               | 0.188343  | 2.416006  |

**Table S15.** Molecular geometries of saddle-Naph7-H generated by substituting the diphenylene moieties of the energy-minimized structure of saddle-Naph7, calculated at the B3LYP/6-31G(d) level, with hydrogen atoms. Single point calculation was performed at B3LYP/6-311G(2d,p) level.

| Center Number | Atomic Number | Atomic Type | Coordinates (Angstroms) |           |           |
|---------------|---------------|-------------|-------------------------|-----------|-----------|
|               |               |             | X                       | Y         | Z         |
| 1             | 6             | 0           | -1.410902               | -1.063538 | -0.666273 |
| 2             | 6             | 0           | -0.700123               | -1.865541 | -1.539789 |
| 3             | 6             | 0           | 0.700110                | -1.865538 | -1.539794 |
| 4             | 6             | 0           | 1.423513                | -1.060049 | -0.662218 |
| 5             | 6             | 0           | -0.727551               | -0.000048 | 0.000048  |
| 6             | 6             | 0           | 0.727552                | -0.000048 | 0.000048  |
| 7             | 6             | 0           | 1.410901                | 1.063436  | 0.666411  |
| 8             | 6             | 0           | 0.700114                | 1.865352  | 1.539993  |

**Table S16.** Molecular geometries of twisted-Ant7-H generated by substituting the diphenylene moieties of the energy-minimized structure of twisted-Ant7, calculated at the B3LYP/6-31G(d) level, with hydrogen atoms. Single point calculation was performed at B3LYP/6-311G(2d,p) level.

| Center Number | Atomic Number | Atomic Type | Coordinates (Angstroms) |           |           |
|---------------|---------------|-------------|-------------------------|-----------|-----------|
|               |               |             | X                       | Y         | Z         |
| 1             | 6             | 0           | -1.414387               | 1.572046  | -0.614356 |
| 2             | 6             | 0           | -0.703858               | 2.539796  | -1.286883 |
| 3             | 6             | 0           | 0.703858                | 2.539796  | -1.286883 |
| 4             | 6             | 0           | 1.414387                | 1.572046  | -0.614356 |
| 5             | 6             | 0           | -0.732351               | 0.393060  | -0.156728 |
| 6             | 6             | 0           | 0.732351                | 0.393060  | -0.156728 |
| 7             | 6             | 0           | 1.420663                | -0.777114 | 0.248571  |
| 8             | 6             | 0           | 0.719161                | -1.722891 | 1.046380  |
| 9             | 6             | 0           | -0.719161               | -1.722891 | 1.046380  |
| 10            | 6             | 0           | -1.408475               | -0.773393 | 0.254369  |
| 11            | 6             | 0           | 1.398752                | -2.702287 | 1.834365  |

**Table S17.** Molecular geometries of saddle-Ant7-H generated by substituting the diphenylene moieties of the energy-minimized structure of saddle-Ant7, calculated at the B3LYP/6-31G(d) level, with hydrogen atoms. Single point calculation was performed at B3LYP/6-311G(2d,p) level.

| Center Number | Atomic Number | Atomic Type | Coordinates (Angstroms) |   |   |
|---------------|---------------|-------------|-------------------------|---|---|
|               |               |             | X                       | Y | Z |

| Number | Number | Type | X         | Y         | Z         | 13 | 6 | 0 | 0.696214  | 4.481913  | 0.139016  |
|--------|--------|------|-----------|-----------|-----------|----|---|---|-----------|-----------|-----------|
| 1      | 6      | 0    | 1.381210  | -1.652524 | -0.298471 | 14 | 6 | 0 | 1.363719  | 3.297139  | 0.304347  |
| 2      | 6      | 0    | 0.674625  | -2.824427 | -0.212782 | 15 | 1 | 0 | 1.155064  | -3.768391 | -0.452085 |
| 3      | 6      | 0    | -0.674717 | -2.824339 | 0.213620  | 16 | 1 | 0 | -1.155184 | -3.768214 | 0.453217  |
| 4      | 6      | 0    | -1.381268 | -1.652388 | 0.298943  | 17 | 1 | 0 | -2.428565 | 3.306309  | -0.504575 |
| 5      | 6      | 0    | 0.718622  | -0.404115 | 0.009064  | 18 | 1 | 0 | -1.232398 | 5.423357  | -0.222879 |
| 6      | 6      | 0    | -0.718652 | -0.404090 | -0.008982 | 19 | 1 | 0 | 1.232585  | 5.423331  | 0.222072  |
| 7      | 6      | 0    | -1.402610 | 0.803553  | -0.294231 | 20 | 1 | 0 | 2.428648  | 3.306235  | 0.504049  |
| 8      | 6      | 0    | -0.700213 | 2.033091  | -0.178307 | 21 | 1 | 0 | 2.349776  | 0.761979  | 0.789976  |
| 9      | 6      | 0    | 0.700236  | 2.033101  | 0.177794  | 22 | 1 | 0 | 2.332183  | -1.648493 | -0.818750 |
| 10     | 6      | 0    | 1.390220  | 0.804135  | 0.287450  | 23 | 1 | 0 | -2.332236 | -1.648162 | 0.819229  |
| 11     | 6      | 0    | -1.363630 | 3.297162  | -0.304950 | 24 | 1 | 0 | -2.362147 | 0.761229  | -0.796777 |
| 12     | 6      | 0    | -0.696064 | 4.481924  | -0.139754 |    |   |   |           |           |           |

**Table S18.** Molecular geometries of twisted-**Tet7-H** generated by substituting the diphenylene moieties of the energy-minimized structure of twisted-**Tet7-H**, calculated at the B3LYP/6-31G(d) level, with hydrogen atoms. Single point calculation was performed at B3LYP/6-311G(2d,p) level.

| Center Number | Atomic Number | Atomic Type | Coordinates (Angstroms) |           |           | 15 | 6 | 0 | 3.708810  | -1.351453 | 0.368825  |
|---------------|---------------|-------------|-------------------------|-----------|-----------|----|---|---|-----------|-----------|-----------|
|               |               |             | X                       | Y         | Z         | 16 | 6 | 0 | 4.889677  | -0.690510 | 0.175099  |
| 1             | 6             | 0           | 1.219757                | 1.397089  | -0.316402 | 17 | 6 | 0 | 4.889678  | 0.690510  | -0.175166 |
| 2             | 6             | 0           | 0.000000                | 0.718311  | -0.000021 | 18 | 6 | 0 | 3.708810  | 1.351450  | -0.368907 |
| 3             | 6             | 0           | -0.000001               | -0.718309 | -0.000022 | 19 | 1 | 0 | -3.718397 | 2.406649  | 0.615275  |
| 4             | 6             | 0           | 1.219762                | -1.397096 | 0.316296  | 20 | 1 | 0 | -5.832572 | 1.219517  | 0.284604  |
| 5             | 6             | 0           | 2.440265                | -0.697520 | 0.201288  | 21 | 1 | 0 | -5.832577 | -1.219528 | -0.284399 |
| 6             | 6             | 0           | 2.440264                | 0.697515  | -0.201392 | 22 | 1 | 0 | -3.718399 | -2.406643 | -0.615167 |
| 7             | 6             | 0           | -1.219748               | 1.397098  | 0.316358  | 23 | 1 | 0 | 3.718397  | -2.406648 | 0.615182  |
| 8             | 6             | 0           | -2.440260               | 0.697524  | 0.201383  | 24 | 1 | 0 | 5.832574  | -1.219522 | 0.284475  |
| 9             | 6             | 0           | -2.440269               | -0.697510 | -0.201299 | 25 | 1 | 0 | 5.832575  | 1.219525  | -0.284522 |
| 10            | 6             | 0           | -1.219771               | -1.397089 | -0.316343 | 26 | 1 | 0 | 3.718400  | 2.406647  | -0.615250 |
| 11            | 6             | 0           | -3.708807               | 1.351453  | 0.368829  | 27 | 1 | 0 | -1.163411 | -2.339347 | -0.849286 |
| 12            | 6             | 0           | -4.889675               | 0.690506  | 0.175220  | 28 | 1 | 0 | 1.163393  | -2.339374 | 0.849204  |
| 13            | 6             | 0           | -4.889680               | -0.690513 | -0.175048 | 29 | 1 | 0 | 1.163364  | 2.339343  | -0.849350 |
| 14            | 6             | 0           | -3.708814               | -1.351449 | -0.368808 | 30 | 1 | 0 | -1.163344 | 2.339371  | 0.849270  |

**Table S19.** Molecular geometries of saddle-**Tet7-H** generated by substituting the diphenylene moieties of the energy-minimized structure of saddle-**Tet7-H**, calculated at the B3LYP/6-31G(d) level, with hydrogen atoms. Single point calculation was performed at B3LYP/6-311G(2d,p) level.

| Center Number | Atomic Number | Atomic Type | Coordinates (Angstroms) |           |           | 15 | 6 | 0 | -3.695918 | -1.400119 | 0.012875  |
|---------------|---------------|-------------|-------------------------|-----------|-----------|----|---|---|-----------|-----------|-----------|
|               |               |             | X                       | Y         | Z         | 16 | 6 | 0 | -4.872663 | -0.710993 | -0.119302 |
| 1             | 6             | 0           | -1.218837               | 1.424248  | 0.267453  | 17 | 6 | 0 | -4.872663 | 0.710992  | -0.119302 |
| 2             | 6             | 0           | 0.000027                | 0.735384  | 0.000128  | 18 | 6 | 0 | -3.695919 | 1.400118  | 0.012875  |
| 3             | 6             | 0           | 0.000026                | -0.735382 | 0.000128  | 19 | 1 | 0 | 3.695540  | 2.484691  | 0.008442  |
| 4             | 6             | 0           | -1.218837               | -1.424247 | 0.267452  | 20 | 1 | 0 | 5.807634  | 1.250804  | 0.242752  |
| 5             | 6             | 0           | -2.438867               | -0.722005 | 0.118956  | 21 | 1 | 0 | 5.807633  | -1.250807 | 0.242751  |
| 6             | 6             | 0           | -2.438867               | 0.722005  | 0.118956  | 22 | 1 | 0 | 3.695539  | -2.484691 | 0.008442  |
| 7             | 6             | 0           | 1.218771                | 1.424233  | -0.267313 | 23 | 1 | 0 | -3.695509 | -2.484729 | -0.008341 |
| 8             | 6             | 0           | 2.438882                | 0.721970  | -0.118942 | 24 | 1 | 0 | -5.807606 | -1.250796 | -0.243009 |
| 9             | 6             | 0           | 2.438881                | -0.721970 | -0.118943 | 25 | 1 | 0 | -5.807608 | 1.250795  | -0.243009 |
| 10            | 6             | 0           | 1.218771                | -1.424233 | -0.267312 | 26 | 1 | 0 | -3.695510 | 2.484728  | -0.008341 |
| 11            | 6             | 0           | 3.695915                | 1.400095  | -0.012961 | 27 | 1 | 0 | 1.214739  | -2.379526 | -0.779615 |
| 12            | 6             | 0           | 4.872700                | 0.710972  | 0.119078  | 28 | 1 | 0 | -1.214838 | -2.379444 | 0.779936  |
| 13            | 6             | 0           | 4.872700                | -0.710974 | 0.119078  | 29 | 1 | 0 | -1.214839 | 2.379445  | 0.779936  |
| 14            | 6             | 0           | 3.695913                | -1.400095 | -0.012961 | 30 | 1 | 0 | 1.214739  | 2.379527  | -0.779615 |
